1 **Age-Specific All-Cause Mortality Disparities by Race and Ethnicity During the**  
2 **COVID-19 Pandemic**

3  
4 Jeremy Samuel Faust, MD, MS<sup>1\*</sup>  
5 Benjamin Renton, BA<sup>2</sup>  
6 Tasce Bongiovanni, MD, MPP, MHS<sup>3</sup>  
7 Alexander Junxiang Chen   
8 Karen Dorsey Sheares, MD, PhD   
9 Chengan Du, PhD   
10 Utibe R. Essien, MD, MPH   
11 Elena Fuentes-Afflick, MD, MPH<sup>3</sup>  
12 Trent Haywood, MD, JD   
13 Rohan Khera, MD, MS   
14 Terris King, MS, ScD   
15 Shu-Xia Li, PhD   
16 Zhenqiu Lin, PhD   
17 Yuan Lu, ScD   
18 Andrew D.A. Marshall, MD, MBI<sup>1</sup>  
19 Chima D. Ndumele, MPH, PhD   
20 Ijeoma Opara, PhD, MSW, MPH   
21 Tina Loarte-Rodriguez, DNP, RN, CPPS, CPHRM   
22 Mitsuaki Sawano, MD, PhD   
23 Kekoa Taparra, MD, PhD<sup>1</sup>   
24 Herman A. Taylor, MD, MPH<sup>11</sup>  
25 Karol E. Watson, MD, PhD   
26 Clyde W. Yancy, MD, MSc   
27 Harlan M. Krumholz, MD, SM   
28

29 *Affiliations: <sup>1</sup> Department of Emergency Medicine, Mass General Brigham; Division of Health*  
30 *Services Research, Harvard Medical School, Boston, MA. <sup>2</sup> Ontos Analytics; Brown University*  
31 *School of Public Health, Cambridge, MA. <sup>3</sup> University of California, San Francisco, San*  
32 *Francisco, CA.  Harvard University, Cambridge, MA.  Yale University, New Haven, CT.*   
33 *Yale New Haven Hospital Center for Outcomes Research and Evaluation, New Haven, CT.*   
34 *Division of General Internal Medicine and Health Services Research, David Geffen School of*  
35 *Medicine at UCLA, Los Angeles, CA.  Knowality, LLC, Chicago, IL.  The Grace Foundation,*  
36 *Baltimore, MD. <sup>11</sup>  Stanford University, Stanford, CA. <sup>11</sup> Morehouse School of Medicine, Atlanta,*  
37 *GA.*

38  
39 *\*Corresponding author*  
40 *10 Vining Street*  
41 *Boston, MA 02115*  
42 [jsfaust@bwh.harvard.edu](mailto:jsfaust@bwh.harvard.edu)  
43

44 Word count: 2,881 Figures: 4, Tables: 1, References: 40  
45 Supplement: Methods, 13 figures, 13 tables  
46

47  
48  
49  
50  
51  
52  
53  
54  
55  
56  
57  
58  
59  
60  
61  
62  
63  
64  
65  
66  
67  
68  
69  
70  
71  
72  
73

## **ABSTRACT**

**BACKGROUND.** The end of the public health emergency provides an opportunity to fully describe disparities during the Covid-19 pandemic.

**METHODS.** In this retrospective cohort analysis of US deaths during the Covid-19 public health emergency (March 2020-April 2023), all-cause excess mortality and years of potential life lost (YPLL) were calculated by race or ethnicity overall and by age groups (ages <25 years, 25-64 years, ≥65 years). Temporal correlations with Covid-19-specific mortality were measured.

**RESULTS.** >1.38 million all-cause excess deaths and ~23 million corresponding YPLL occurred during the pandemic. Had the rate of excess mortality observed among the White population been observed among the total population, >252,300 (18%) fewer excess deaths, and >5,192,000 fewer (22%) YPLL would have occurred. The highest excess mortality rates were among the American Indian/Alaska Native (AI/AN, 822 per 100,000; ~405,700 YPLL) and the Black (549 per 100,000; ~4,289,200 YPLL) populations. The highest relative increase in mortality was observed in the AI/AN population (1.34; 95% CI 1.31-1.37), followed by Hispanic (1.31; 95% CI 1.27-1.34), Native Hawaiian or Other Pacific Islander (1.24; 95% CI 1.21-1.27), Asian (1.20; 95% CI 1.18-1.20), Black (1.20; 95% CI 1.18-1.22) and White (1.12; 95% CI 1.09-1.15) populations. Greater disparities occurred among children and adults <65 years.

**CONCLUSIONS.** Excess mortality occurred in all groups during the Covid-19 pandemic, with disparities by race and ethnicity, especially in younger and middle-aged populations. >252,000 and 5.2 million fewer YPLL would have been observed had increases in mortality among the total population been similar to the White population.

74 **Introduction**

75 The end of the Covid-19 public health emergency in the US provides an opportunity to evaluate  
76 mortality disparities. A focus on all-cause mortality allows a comprehensive perspective of the  
77 overall impact of the pandemic, capturing direct Covid-19 deaths (including miscategorized  
78 Covid-19-related deaths) and indirect consequences of the pandemic, including consequences for  
79 populations that are frequently excluded from public-facing reports and dashboards.<sup>1-8</sup>

80  
81 We assessed mortality disparities by race and ethnicity during the Covid-19 pandemic, overall  
82 and stratified by age, during the US public health emergency. Using CDC data, we modeled and  
83 measured cumulative all-cause excess mortality, analyzed the age distribution of excess deaths,  
84 and estimated the years of potential lost life (YPLL) for each race and ethnicity, for age groups,  
85 and determined how many of these deaths and years of lost life could have been averted, had  
86 subgroup ratios replicated those observed in the White population. To determine whether  
87 existing disparities were replicated or augmented during the pandemic, pre-pandemic and  
88 pandemic all-cause mortality risks by race/ethnicity and age were measured, with attention to  
89 variation during Covid-19 waves and differences between the pre-vaccine and vaccine eras.

90  
91 **Methods**

92 To measure pandemic-associated mortality by race/ethnicity, we adapted established methods for  
93 computing age-adjusted rates, estimating excess mortality and years of potential life lost.<sup>1,5-10</sup>  
94 Using the CDC Single Race designations, we divided the US population into seven race/ethnicity  
95 groups: Non-Hispanic American Indian/Alaska Native (AI/AN), Non-Hispanic Asian (Asian),  
96 Non-Hispanic-Black or African American (Black), Hispanic of all races (Hispanic), Non-  
97 Hispanic Native Hawaiian or Other Pacific Islander (NHPI), and Non-Hispanic White (White).  
98 Persons who reported “more than one race” were included for completeness but not analyzed as  
99 a group.<sup>11</sup> Hispanic ethnicity was not stated for 0.0027% of deaths and these deaths were  
100 excluded (race categorization was available for all deaths). We divided each race/ethnicity into  
101 three age groups: <25, 25-64, and ≥65 years. The 38-month study period was March 1, 2020-  
102 April 30, 2023.

103  
104 **Data**

105 We used deidentified, publicly available death and US Census population data from the CDC’s  
106 Wide-ranging Online Data for Epidemiologic Research (WONDER), which encompasses all  
107 deaths among US residents.<sup>12</sup>

108  
109 **Analyses**

110 **Excess Mortality**

111 Excess mortality was defined as the number of raw, observed, deaths minus modeled expected  
112 deaths.<sup>9,10</sup> To estimate expected deaths, we used seasonal, autoregressive integrated moving  
113 averages (ARIMA) for all-cause mortality by component demographic (race/ethnicity and age  
114 grouping). For each demographic, ARIMA models were trained using pre-pandemic population  
115 data (2014-2020) to estimate yearly populations for 2021-2023 (estimated yearly changes were  
116 divided evenly over 12 months). Seasonal ARIMA models were trained on monthly death counts  
117 (62 pre-pandemic months, January 2015-February 2020) for each age group, using the estimated  
118 monthly populations as covariates to overcome stationarity. Composite all-ages estimates were

119 summed from the component age-group models and populations were corrected for cumulative  
120 excess mortality (see Supplement, p.2-3).

121

### 122 **Years of Potential Life Lost**

123 To estimate total and per capita years of potential life lost (YPLL), we modeled excess deaths for  
124 each race/ethnicity by 10-year age group (except <25 years and >85 years) and applied CDC life  
125 table figures to calculate the expectation of life for single year ages for each race/ethnicity (see  
126 Supplement, p.3).<sup>13</sup>

127

### 128 **Potential Excess Deaths and YPLL Averted**

129 Potential excess deaths and YPLL averted were calculated by applying the observed-to-expected  
130 ratios observed in the same-age White population to each race/ethnicity group and summed for  
131 overall tallies (See Supplement, p.3).

132

### 133 **Disparity Rate Ratios**

134 We calculated disparity rate ratios (DRR) during the pandemic by dividing the share of the  
135 excess mortality and YPLL of each race/ethnicity, within each age group, by the population  
136 share within that age group. 95% CIs were determined using bandwidths from the excess  
137 mortality model (See Supplement, p.4).

138

### 139 **Cause-Specific Excess Mortality**

140 An analysis of cause-specific excess mortality was conducted to characterize disparities by  
141 specific medical (i.e., “natural”) causes and external manner of death (e.g., accidents, homicide).  
142 We applied the methods described above, with two modifications based on data availability (see  
143 Supplement, p.4). Pearson coefficients correlating all-cause excess mortality and select medical  
144 causes of death (including Covid-19; ICD U00-U99: Codes for special purposes, of which  
145 Covid-19 comprised >99.992% of deaths) and for external manner of death, were determined to  
146 assess temporal associations. Correlations  $\geq 0.6$  were considered strong; 0.4-0.59 were considered  
147 moderate.

148

### 149 **Changes in Mortality Disparities**

150 To determine whether pre-pandemic mortality disparities changed over the course of the  
151 pandemic, we measured pre-pandemic (March 2015-February 2020) and pandemic relative risks  
152 (RR) for all-cause mortality incidence rates for every group and used the contemporaneous  
153 same-age White population as comparators. Yearly and monthly RRs were determined for pre-  
154 pandemic (e.g., March 2015-February 2016) and pandemic years (e.g., March 2020-February  
155 2021). 95% confidence intervals for all RRs were determined via the geometric means of  
156 monthly RRs within specific periods (yearly, pre-pandemic, and pandemic).

157

158 Analyses were performed in R 4.0.3 and Microsoft Excel 16.74. Exhibits were created in  
159 Flourish (Canva UK Operations, London, UK). This study of de-identified publicly available  
160 data complied with the GATHER checklist and did not require institutional review board  
161 approval.<sup>14</sup>

## 162 Results

163 **Excess Deaths and Years of Potential Lost Life.** There were >1.38 million all-cause excess  
164 deaths and ~23 million corresponding years of potential life lost (YPLL) during the pandemic.  
165 Had the rate of excess mortality observed among the White population been observed among the  
166 total population, >252,300 (18%) fewer excess deaths, corresponding to >5,192,000 fewer (22%)  
167 YPLL would have occurred, including >133,800 fewer excess deaths and >2,899,600 YPLL in  
168 the Hispanic population alone. (Table 1).

169  
170 Over 454,200 (32.9%) excess deaths occurred in people under age 65 (Table 1), accounting for  
171 ~14,209,200 (61.2%) YPLL; there were ~13,104,500 YPLL among persons ages 25-64 and  
172 ~1,104,700 YPLL among persons ages <25 (Table 1, Table S1-3). Raw counts, incidence rates,  
173 and observed-to-expected ratio for excess mortality varied by race/ethnicity among all age  
174 groups (Table 1, Figure 1, Figure S1-3). The highest rates of excess mortality and YPLL per  
175 capita were observed among the AI/AN (822 excess deaths per 100,000; ~405,700 YPLL) and  
176 Black populations (549 excess deaths per 100,000; ~4,289,200 YPLL, Table 1). The highest  
177 observed-to-expected ratios were documented among the AI/AN (1.34, 95% CI 1.31-1.37) and  
178 Hispanic (1.31, 95% CI 1.27-1.34) populations (Figure 1, Panel A). Greater YPLL per capita  
179 (and per excess death) among AI/AN, Black, Hispanic, and NHPI populations were observed  
180 (Figure 2, Table S4-5), reflecting younger mean/median ages of mortality (Figure S4-5), as  
181 compared with Asian and White populations.

182  
183 Among younger persons (<25 years), the number of excess deaths included ~9,000 Black  
184 (~542,90 YPLL), ~6,000 Hispanic (395,000 YPLL), ~400 AI/AN (~23,800 YPLL), and 100  
185 NHPI people (~7,500 YPLL) (95% confidence intervals for excess mortality and corresponding  
186 YPLL among younger Asian and White people crossed 0) (Figure 1, Panel B, Table S1). The  
187 rates and observed-to-expected ratios are reported in Table 1 and Table S1.

188  
189 Excess deaths among adults ages 25-64 years included ~213,300 White (~6,743,200 YPLL),  
190 ~97,400 Hispanic (~2,993,500 YPLL), ~97,300 Black (~2,534,600), ~11,500 Asian (~356,700  
191 YPLL), ~11,700 AI/AN (~308,000 YPLL), and ~1,950 NHPI (~73,000 YPLL) people (Table  
192 S2). Incidence rates (Table S2) and observed-to-expected ratios were highest among AI/AN,  
193 Hispanic, and NHPI populations (Figure 1, Panel C). While older adults ( $\geq 65$  years) accounted  
194 for 67% of excess mortality for all race/ethnicities combined, among AI/AN and NHPI  
195 populations, people ages <65 years accounted for most of the excess mortality (60.5% and  
196 70.3%, respectively) (Table 1, Figure 2, Panels B-C, Table S1-2). The shares of excess mortality  
197 among those <65 years in each race/ethnicity were: NHPI (70.3%), AI/AN (60.5%), Black  
198 (46.6%), Hispanic (46.6%), White (25.2%), and Asian (24.1%) (Table 1).

199  
200 For all race/ethnicity groups, the highest excess mortality incidence rates occurred among older  
201 adults ( $\geq 65$  years, Figure 1, Panel D, Table S3), but among all age groups, the observed-to-  
202 expected ratios were lower for each population of older adults as compared to adults ages 25-64  
203 (Figure 1, Panel D, Table 1, compare to Figure 1, Panel C and Table S2).

204  
205 **Disparity rate ratios (DRR).** The share of excess mortality exceeded the share of the population  
206 among AI/AN (DRR; 1.4% share of excess deaths/0.7% population share=1.96), Black (DRR;  
207 16.5% share of excess deaths/12.6% population share=1.31), and NHPI (DRR; 0.2% share of

208 excess deaths=0.2% population share =1.12) populations (Table S4). Similar findings were  
209 documented by age group (Table S4), though among those ages <25 years, the Black population  
210 accounted for a majority (51.4%) of excess mortality despite representing only 13.8% of the age  
211 demographic population (DRR=3.72, Figure 2, Table S4).

212  
213 **Covid and all-cause excess mortality.** During the pre-vaccine era, the magnitude of excess  
214 mortality (per person-month) and between-group disparities were greater (Figure 3, Figure S4,  
215 Figure S6) than later in the pandemic. Monthly all-cause excess mortality correlated very  
216 strongly with Covid-19-specific mortality for the total population (Figure 3) and among adults  
217 ages 25-64 and >65 years (Figures S8-9). Weak correlations were observed between all-cause  
218 excess mortality and Covid-19-specific mortality for the population ages <25 years (Table S6;  
219 Figure S7). Cause-specific excess mortality and Covid-19 mortality demonstrated moderate or  
220 strong correlations according to several medical causes of death (Figure S7) and varied by  
221 race/ethnicity and age (Figures S10-13). Excess mortality for external manner deaths (e.g.,  
222 accidents, homicide, unintentional overdose) was observed for all race/ethnicity groups. No  
223 significant correlations were detected between external manner deaths and Covid-19 mortality  
224 (Table S7).

225  
226 **Changes in all-cause mortality disparities during the pandemic.** Established pre-pandemic  
227 disparities in all-cause mortality by race/ethnicity (age-adjusted RRs) increased during the  
228 pandemic (Figure 4, Panel A-C). Baseline all-cause mortality disparities were greatest among  
229 older adults, as were pandemic-associated increases (Figure 4, Panels D-L, Table S8).

230  
231 For the entire group, compared with the White population referent, AI/AN and Black populations  
232 experienced the greatest disparities during the pre-pandemic and pandemic phases. Among the  
233 AI/AN population, the pre-pandemic RR (1.07, 95% CI 1.06-1.08), increased to 1.22, 95% CI  
234 1.21-1.22 (Table S8-13). Among the Black population, the pre-pandemic RR 1.19 (95% CI 1.19-  
235 1.19) increased to 1.26 (95% CI 1.26-1.27). Among the Asian, Hispanic, and NHPI groups (i.e.,  
236 those with favorable pre-pandemic baselines relative to the White population, all-cause mortality  
237 RRs increased during the pandemic.

238  
239 Among older adults, significant increases from baseline RRs occurred in only two groups: Black  
240 (1.07 pre-pandemic; 95% CI 1.07-1.07 to 1.11 pandemic; 95% CI 1.11-1.12) and Hispanic (0.72  
241 pre-pandemic; 95% CI 0.71 - 0.72 to 0.79 pandemic; 95% CI 0.79 - 0.79) (Figure 4, Panels J-L).  
242 In the population ages 25-64, the AI/AN population experienced the highest pre-pandemic  
243 mortality disparity (1.64; 95% CI 1.62-1.66), and the largest RR increase (2.10; 95% CI 2.08-  
244 2.13) (Figure 4, Panels G-I, Table S8). Among those ages <25 years, the Black population had  
245 the highest mortality disparity at baseline (1.96; 95% CI 1.94-1.97) and the largest RR increase  
246 during the pandemic (to 2.31; 95% CI 2.29-2.33) (Figure 4, Panels D-F, Table S8).

247  
248 Changes in pre-pandemic disparities were greater during Covid-19 waves (Figure 4). Changes in  
249 disparities peaked during the first or second pandemic year and then receded, but among the  
250 population ages <25, mortality RR continued to rise or remained stably elevated compared with  
251 pre-pandemic baselines (Figure 4, Table S11). By the third pandemic year, RRs for mortality had  
252 returned to pre-pandemic levels except for AI/AN and NHPI populations (Figure 4, Table S10-

253 13). In analyses of the entire group, changes from pre-pandemic baselines were mostly abolished  
254 during the vaccine era. (Table S9).

## 255 Discussion

256 This study documents massive mortality disparities during the US Covid-19 public health  
257 emergency, accounting for 252,000 more excess deaths and 5.2 million more YPLL than would  
258 have occurred without the disparities. Though all racial/ethnic groups experienced pandemic-  
259 associated excess mortality, AI/AN people experienced the highest rate of all-cause excess  
260 mortality and the greatest disparity; their share of excess mortality was nearly twice what would  
261 have been projected, based on population shares. Age-stratified analyses revealed important  
262 disparities in the <65 population overall, with the largest increases in mortality (observed-to-  
263 expected ratio) occurring among adults ages 25-64 years in each race/ethnicity. In the population  
264 ages <25 years, Black people comprised a majority (51%) of all-cause excess deaths despite  
265 representing 14% of the demographic population. Excess mortality among <25 years) was  
266 documented among AI/AN, Hispanic, and NHPI but not among the Asian or White populations  
267 (Figure 1). Additionally, a long-standing (pre-pandemic) finding of lower all-cause mortality rate  
268 in the Hispanic population compared with White and Asian population was narrowed and even  
269 reversed during Covid-19 waves.<sup>15</sup>

270  
271 This analysis extends the existing literature in several ways. First, we utilized age-stratified  
272 component excess mortality modeling, rather than age-adjustment, which identified substantial  
273 differences in excess mortality by race/ethnicity, particularly among the population <65 years;  
274 this method allowed us to more accurately characterize ground conditions, permitted YPLL  
275 estimates within groups, and unveiled profound, long-term implications related to excess  
276 mortality that was concentrated among the younger demographics. Second, these data offer  
277 detailed accounts of disparities which spanned the entire pandemic. Despite early awareness of  
278 disparities, some persisted—albeit disparities decreased in older populations after vaccines  
279 became available (and after the initial Omicron wave) (Figures S1-3, Tables S8-S13). Third, we  
280 used pre-pandemic and pandemic age-adjusted, all-cause mortality rates to establish the finding  
281 that existing mortality disparities among certain groups widened during the Covid-19 era, rather  
282 than merely having been amplified by global increases in incident rates, an effect especially  
283 pronounced among working-aged adults. Known Covid-19 waves were associated with sudden  
284 changes in disparities.<sup>16</sup> Fourth, we conducted exploratory analyses that identified increases in  
285 non-Covid-19 causes of mortality during the pandemic; increases in select medical causes of  
286 death correlated with Covid-19 mortality waves, which implied that many “non-Covid” deaths  
287 were directly or indirectly caused by the virus or secondary effects. The result is the most  
288 comprehensive assessment of US Covid-19 pandemic-associated mortality disparities by  
289 race/ethnicity and age.

290  
291 Importantly, we demonstrate that the pandemic exacerbated historical disparities due to strata in  
292 social determinants of health, structural inequality, and racism. Compounding the inherent value  
293 of the loss of life/life-years, associated economic productivity losses resulting from identified  
294 excess mortality in working-aged and younger adults have important implications, as health and  
295 economic affluence are correlated.<sup>25</sup> Meanwhile, less dramatic disparities among older

296 populations, before and during the pandemic, likely reflect “healthy survivor” effects among  
297 groups with higher death rates in younger demographics.  
298

299 Given that race and ethnicity are social constructs, the magnitude of these findings cannot be  
300 explained by genetic differences. Possible biological and sociological explanations for our  
301 findings include higher rates of pre-existing conditions associated with poor Covid-19 outcomes,  
302 higher probability of viral exposure during the pre-vaccine era (reflecting higher shares of  
303 essential workers in certain populations, initial lack of equitable access to Covid-19 testing,  
304 decreased remote learning or access to school-implemented mitigation measures, and distrust in  
305 public messaging focused on infection prevention), decreased access to healthcare (including *de*  
306 *facto* segregated systems), and racial biases in Covid-19 treatment<sup>17-22</sup>—all manifestations of  
307 inequities stemming from structural racism and poverty disparities. Initial skepticism of Covid-  
308 19 vaccines related to historical medical mistrust was likely another factor; during the early  
309 vaccine rollout, receipt of vaccinations was lower among Black people<sup>23</sup>; however, decreased  
310 disparities in all-cause mortality in Black people coincided with increased vaccine uptake later in  
311 2021, suggesting successful messaging from trusted leaders.<sup>24</sup>  
312

313 To prepare for future pandemics, efforts to protect high-risk groups—utilizing evidence-based  
314 policy, equitable distribution of resources, and improving infrastructure—are essential. To  
315 achieve this level of preparation, systemic factors must be addressed. In addition to preparation  
316 efforts, just-in-time responses should be directed toward high-risk communities during  
317 emergencies (pandemics, natural, or human-caused disasters).<sup>26</sup> For example, policies providing  
318 appropriate and cost-free isolation for essential workers would have prevented chains of Covid-  
319 19 transmission to higher-risk people who resided in multi-generation households, especially  
320 during pre-vaccine and pre-therapeutic eras.<sup>27-29</sup> Similarly, efforts to increase vaccination uptake  
321 and implement effective therapeutics among at-risk populations would have reduced  
322 disparities.<sup>23,30-36</sup> For the overall population and among all adults (>25 years), existing  
323 race/ethnicity mortality disparities widened at the onset of the pandemic and during Covid-19  
324 waves but narrowed during the vaccine era. The successes of mass vaccination efforts in 2021  
325 mitigated access barriers but were not replicated during subsequent booster campaigns.  
326 Differences in vaccination rates and booster receipt in at-risk persons may partly explain why the  
327 AI/AN population experienced higher excess mortality later in the pandemic, as this population  
328 predominantly lives in underserved areas where access barriers are more common.<sup>21,22</sup> Lastly, the  
329 pandemic was associated with increases in deaths by external manner (e.g., homicide,  
330 unintentional overdose, albeit not suicide), especially in younger age groups, with marked  
331 between-group differences.<sup>37,38</sup> Unlike several medical causes of death, external manner deaths  
332 were not temporally correlated with Covid-19- mortality (Figures S10-13).<sup>39</sup>  
333

334 This study has limitations. First, calculating all-cause excess mortality relies on estimating  
335 expected deaths. While pre-pandemic trends would likely have continued without the pandemic,  
336 certainty is not possible. Second, the determination/coding of race/ethnicity at the time of death  
337 is not standardized, which could result in inaccuracies. However, these issues are unlikely to  
338 have changed during the pandemic. Third, the exploratory cause/manner of death analyses are  
339 subject to death certificate inaccuracies. Fourth, instead of granularity, we defined three large age  
340 groups to capture generational differences, which may have had small effects on the final  
341 estimates.



342  
343 This study describes substantial mortality disparities by race/ethnicity in the US during the  
344 Covid-19 public health emergency period, particularly among younger populations, often  
345 dramatically exceeding pre-pandemic disparities. While pandemics are inevitable, disparities are  
346 not. The need to address the conditions that create health disparities—before the next public  
347 health crisis—is evident.

## 348 Acknowledgements

349  
350 **Conflict of Interest Disclosures:** Dr. Krumholz reported receiving expenses and/or personal  
351 fees within the past 3 years from UnitedHealth, Element Science, Aetna, Reality Labs,  
352 Tesseract/4Catalyst, F-Prime, Siegfried and Jensen law firm, Arnold and Porter law firm, and  
353 Martin/Baughman law firm; being a co-founder of Refactor Health and HugoHealth; and being  
354 associated with contracts through Yale New Haven Hospital from the Centers for Medicare &  
355 Medicaid Services and through Yale University from Johnson & Johnson. No other disclosures  
356 were reported.

## 357 References

- 358  
359 1. Rossen LM. Excess Deaths Associated with COVID-19, by Age and Race and Ethnicity — United  
360 States, January 26–October 3, 2020. *MMWR Morb Mortal Wkly Rep.* 2020;69.  
361 doi:10.15585/mmwr.mm6942e2
- 362 2. Truman BI. Provisional COVID-19 Age-Adjusted Death Rates, by Race and Ethnicity — United  
363 States, 2020–2021. *MMWR Morb Mortal Wkly Rep.* 2022;71. doi:10.15585/mmwr.mm7117e2
- 364 3. CDC/NCIRD. Risk for COVID-19 infection, hospitalization, and death by race/ethnicity. Accessed  
365 October 25, 2023. <https://stacks.cdc.gov/view/cdc/105453>
- 366 4. Aschmann HE, Riley AR, Chen R, et al. Dynamics of racial disparities in all-cause mortality during  
367 the COVID-19 pandemic. *Proc Natl Acad Sci.* 2022;119(40):e2210941119.  
368 doi:10.1073/pnas.2210941119
- 369 5. Morey BN, Chang RC, Thomas KB, et al. No Equity without Data Equity: Data Reporting Gaps for  
370 Native Hawaiians and Pacific Islanders as Structural Racism. *J Health Polit Policy Law.*  
371 2022;47(2):159-200. doi:10.1215/03616878-9517177
- 372 6. Taparra K, Pellegrin K. Data aggregation hides Pacific Islander health disparities. *The Lancet.*  
373 2022;400(10345):2-3. doi:10.1016/S0140-6736(22)01100-X
- 374 7. Taparra K, Harding M, Deville C. Healing and Health Equity for Asian American, Native Hawaiian,  
375 and Pacific Islander Populations. *JAMA.* 2021;326(23):2432-2433. doi:10.1001/jama.2021.19243
- 376 8. Msemburi W, Karlinsky A, Knutson V, Aleshin-Guendel S, Chatterji S, Wakefield J. The WHO  
377 estimates of excess mortality associated with the COVID-19 pandemic. *Nature.* 2023;613(7942):130-  
378 137. doi:10.1038/s41586-022-05522-2

- 379 9. Faust JS, Renton B, Chen AJ, et al. The uncoupling of all-cause excess mortality from Covid-19  
380 cases and associated hospitalizations in late winter and spring of 2022 in a highly vaccinated state.  
381 Published online July 12, 2022:2022.07.07.22277315. doi:10.1101/2022.07.07.22277315
- 382 10. Faust JS, Du C, Liang C, et al. Excess Mortality in Massachusetts During the Delta and Omicron  
383 Waves of COVID-19. *JAMA*. Published online May 20, 2022. doi:10.1001/jama.2022.8045
- 384 11. CDC/NCHS. Single-Race Population Estimates 2010-2020 by State and Single-Year Age Results  
385 Form. Accessed December 8, 2021.  
386 [https://wonder.cdc.gov/controller/datarequest/D170;jsessionid=BAA4FC0C3018EB0B7E6EB6868D](https://wonder.cdc.gov/controller/datarequest/D170;jsessionid=BAA4FC0C3018EB0B7E6EB6868DA2)  
387 [A2](https://wonder.cdc.gov/controller/datarequest/D170;jsessionid=BAA4FC0C3018EB0B7E6EB6868DA2)
- 388 12. National Center for Health Statistics. CDC WONDER. Accessed January 16, 2023.  
389 <https://wonder.cdc.gov/>
- 390 13. Arias E. United States Life Tables, 2020.
- 391 14. HHS. 45 CFR 46 | HHS.gov. Accessed August 10, 2023. [https://www.hhs.gov/ohrp/regulations-and-](https://www.hhs.gov/ohrp/regulations-and-policy/regulations/45-cfr-46/index.html)  
392 [policy/regulations/45-cfr-46/index.html](https://www.hhs.gov/ohrp/regulations-and-policy/regulations/45-cfr-46/index.html)
- 393 15. Chen Y, Freedman ND, Rodriguez EJ, et al. Trends in Premature Deaths Among Adults in the United  
394 States and Latin America. *JAMA Netw Open*. 2020;3(2):e1921085.  
395 doi:10.1001/jamanetworkopen.2019.21085
- 396 16. Shiels MS, Haque AT, Haozous EA, et al. Racial and Ethnic Disparities in Excess Deaths During the  
397 COVID-19 Pandemic, March to December 2020. *Ann Intern Med*. 2021;174(12):1693-1699.  
398 doi:10.7326/M21-2134
- 399 17. Kabarriti R, Brodin NP, Maron MI, et al. Association of Race and Ethnicity With Comorbidities and  
400 Survival Among Patients With COVID-19 at an Urban Medical Center in New York. *JAMA Netw*  
401 *Open*. 2020;3(9):e2019795. doi:10.1001/jamanetworkopen.2020.19795
- 402 18. Weiser JK, Tie Y, Beer L, Neblett Fanfair R, Shouse RL. Racial/Ethnic and Income Disparities in the  
403 Prevalence of Comorbidities that Are Associated With Risk for Severe COVID-19 Among Adults  
404 Receiving HIV Care, United States, 2014-2019. *J Acquir Immune Defic Syndr* 1999. 2021;86(3):297-  
405 304. doi:10.1097/QAI.0000000000002592
- 406 19. Khazanchi R, Marcelin J, Abdul-Mutakabbir J, Essien U. Race, Racism, Civil Rights Law, And The  
407 Equitable Allocation Of Scarce COVID-19 Treatments. *Health Aff Forefr*.  
408 doi:10.1377/forefront.20220208.453850
- 409 20. Levine DM, Linder JA, Landon BE. Characteristics of Americans With Primary Care and Changes  
410 Over Time, 2002-2015. *JAMA Intern Med*. 2020;180(3):463-466.  
411 doi:10.1001/jamainternmed.2019.6282
- 412 21. Zahnd WE, Gadag K, Ullrich F, Mueller KJ. COVID-19 Mortality Rates across Noncore,  
413 Micropolitan, and Metropolitan Counties by Community Characteristics, December 2020-January  
414 202.
- 415 22. Macintosh C. Health Coverage Options for American Indians and Alaska Natives.

- 416 23. Kriss JL. COVID-19 Vaccination Coverage, by Race and Ethnicity — National Immunization Survey  
417 Adult COVID Module, United States, December 2020–November 2021. *MMWR Morb Mortal Wkly*  
418 *Rep.* 2022;71. doi:10.15585/mmwr.mm7123a2
- 419 24. Coleman C, Birk S, DeVoe J. Health Literacy and Systemic Racism—Using Clear Communication to  
420 Reduce Health Care Inequities. *JAMA Intern Med.* 2023;183(8):753-754.  
421 doi:10.1001/jamainternmed.2023.2558
- 422 25. Chetty R, Stepner M, Abraham S, et al. The Association Between Income and Life Expectancy in the  
423 United States, 2001-2014. *JAMA.* 2016;315(16):1750-1766. doi:10.1001/jama.2016.4226
- 424 26. Taparra K, Purdy M, Raphael KL. From Ashes to Action — Indigenous Health Perspectives on the  
425 Lāhainā Fires. *N Engl J Med.* Published online September 20, 2023. doi:10.1056/NEJMp2309966
- 426 27. Sun K, Loria V, Aparicio A, et al. Behavioral factors and SARS-CoV-2 transmission heterogeneity  
427 within a household cohort in Costa Rica. *Commun Med.* 2023;3(1):1-8. doi:10.1038/s43856-023-  
428 00325-6
- 429 28. Derqui N, Koycheva A, Zhou J, et al. Risk factors and vectors for SARS-CoV-2 household  
430 transmission: a prospective, longitudinal cohort study. *Lancet Microbe.* 2023;4(6):e397-e408.  
431 doi:10.1016/S2666-5247(23)00069-1
- 432 29. Chen YH, Riley AR, Duchowny KA, et al. COVID-19 mortality and excess mortality among  
433 working-age residents in California, USA, by occupational sector: a longitudinal cohort analysis of  
434 mortality surveillance data. *Lancet Public Health.* 2022;7(9):e744-e753. doi:10.1016/S2468-  
435 2667(22)00191-8
- 436 30. CDC. Chronic Kidney Disease (CKD) in the United States - Race/Ethnicity. Accessed August 11,  
437 2023. <https://nccd.cdc.gov/ckd/FactorsOfInterest.aspx?type=Race/Ethnicity>
- 438 31. Behr CL, Joynt Maddox KE, Meara E, Epstein AM, Orav EJ, Barnett ML. Anti-SARS-CoV-2  
439 Monoclonal Antibody Distribution to High-risk Medicare Beneficiaries, 2020-2021. *JAMA.*  
440 2022;327(10):980-983. doi:10.1001/jama.2022.1243
- 441 32. Boehmer TK. Racial and Ethnic Disparities in Outpatient Treatment of COVID-19 — United States,  
442 January–July 2022. *MMWR Morb Mortal Wkly Rep.* 2022;71. doi:10.15585/mmwr.mm7143a2
- 443 33. Faust JS, Kumar A, Shah J, et al. Oral Nirmatrelvir and Ritonavir for Coronavirus Disease 2019 in  
444 Vaccinated, Nonhospitalized Adults Aged 18–50 Years. *Clin Infect Dis.* Published online June 30,  
445 2023:ciad400. doi:10.1093/cid/ciad400
- 446 34. Austin EW, Borah P, Domgaard S. COVID-19 disinformation and political engagement among  
447 communities of color: The role of media literacy. *Harv Kennedy Sch Misinformation Rev.* Published  
448 online March 8, 2021. doi:10.37016/mr-2020-58
- 449 35. Silesky MD, Panchal D, Fields M, et al. A Multifaceted Campaign to Combat COVID-19  
450 Misinformation in the Hispanic Community. *J Community Health.* 2023;48(2):286-294.  
451 doi:10.1007/s10900-022-01170-9
- 452 36. Jost TS. Considering Race and Ethnicity in Covid Risk Assessments — Legal Concerns and Possible  
453 Solutions. *N Engl J Med.* 2022;387(6):481-483. doi:10.1056/NEJMp2206524

- 454 37. Faust JS, Du C, Mayes KD, et al. Mortality From Drug Overdoses, Homicides, Unintentional  
455 Injuries, Motor Vehicle Crashes, and Suicides During the Pandemic, March-August 2020. *JAMA*.  
456 2021;326(1):84. doi:10.1001/jama.2021.8012
- 457 38. Chen R, Aschmann HE, Chen YH, et al. Racial and Ethnic Disparities in Estimated Excess Mortality  
458 From External Causes in the US, March to December 2020. *JAMA Intern Med*. 2022;182(7):776-778.  
459 doi:10.1001/jamainternmed.2022.1461
- 460 39. Flaxman S, Whittaker C, Semenova E, et al. Assessment of COVID-19 as the Underlying Cause of  
461 Death Among Children and Young People Aged 0 to 19 Years in the US. *JAMA Netw Open*.  
462 2023;6(1):e2253590. doi:10.1001/jamanetworkopen.2022.53590
- 463  
464  
465

## 466 Exhibit legends

467

468 **Table 1.** All-cause mortality, excess deaths, potential excess deaths averted, years of potential  
469 life lost (YPLL), and potential YPLL averted by race/ethnicity. Note: CDC life tables do not  
470 currently include NHPI or More than one race categories. Therefore, ranges are supplied based  
471 on applying life expectancy figures from the group with the lowest life expectancy (AI/AN) and  
472 the highest (Asian). Data for the More than one race category are not shown but are included in  
473 the figures for all races (bottom row).

474

475 **Figure 1.** Observed-to-expected ratios for all-cause mortality during the pandemic period by  
476 race/ethnicity are shown from greatest (top) to least (bottom). For each group, the graphed ratio  
477 reflects raw observed deaths divided by the number of modeled expected deaths during the  
478 pandemic period for that specific population; 95% confidence intervals are shown as horizontal  
479 bars. The vertical line (1.0) means no change. A: All ages; B: ages <25 years; C: ages 25-64  
480 years; D: ages  $\geq 65$  years.

481

482 **Figure 2.** Shares of excess death, population and years of potential life lost (YPLL) by  
483 race/ethnicity and age (A: all ages; B: ages <25 years; C: ages 25-64 years; D: ages  $\geq 65$  years).  
484 In each panel, the middle bars show the population share for each race/ethnicity (“More than one  
485 race” group not analyzed elsewhere is included here for completion). Above the middle bar, the  
486 share of excess deaths by race/ethnicity is shown for the demographic. Below the middle bar, the  
487 share of YPLL deaths by race/ethnicity is shown for the demographic. Insets show demographics  
488 with smaller populations.

489

490 **Figure 3.** Monthly all-cause excess mortality and Covid-19-specific mortality by race/ethnicity.  
491 Blue lines show excess mortality; yellow lines show Covid-19-specific mortality. The Pearson  
492 correlation coefficient relating the lines are shown for each race/ethnicity, with their  
493 corresponding p values.

494

495 **Figure 4.** Pandemic yearly (left panels) and monthly (right panels) relative risk (RR) of age-  
496 adjusted all-cause mortality compared to the same-age White population (RR=1.0). For each age  
497 grouping (A-B: all ages; C-D: ages <25 years; E-F: ages 25-64 years; G-H: ages  $\geq 65$  years),  
498 yearly (left) and monthly RR are shown. AI/AN is shown in blue, Asian in green, Black in  
499 yellow, Hispanic in purple, NHPI in orange. 95% confidence intervals are shown for each line  
500 compared to the White population (note: some confidence intervals may be imperceptible due to  
501 narrow bandwidths). The vertical dashed line denotes the beginning of the Covid-19 pandemic  
502 period.

503

504

505 **Table 1:**

**All-cause mortality, excess deaths, and years of potential life lost by race/ethnicity**

| Race                                      | Expected deaths (95% CI)          | Observed Deaths | Excess deaths, no (95% CI)        | Excess deaths, IR (95% CI) | Ratio of observed to expected deaths (95% CI) | Potential Deaths Averted - White as Reference | <25 years share | 25-64 years share | 65+ years share | YPLL            | Potential YPLL Averted | <25 years YPLL | 25-64 years YPLL | 65+ years YPLL | Population per YPLL | YPLL per Excess Death |
|-------------------------------------------|-----------------------------------|-----------------|-----------------------------------|----------------------------|-----------------------------------------------|-----------------------------------------------|-----------------|-------------------|-----------------|-----------------|------------------------|----------------|------------------|----------------|---------------------|-----------------------|
| American Indian or Alaska Native          | 59,203 (57,717 - 60,689)          | 79,214          | 20,011 (18,525 - 21,497)          | 822.25 (761.2 - 883.31)    | 1.34 (1.31 - 1.37)                            | 12,529 (63%)                                  | 2.2             | 58.3              | 39.5            | 405,716         | 268,796 (66%)          | 23,774         | 308,062          | 73,880         | 6                   | 20.8                  |
| Asian                                     | 241,391 (237,821 - 244,961)       | 289,372         | 47,981 (44,411 - 51,551)          | 246.15 (227.84 - 264.47)   | 1.20 (1.18 - 1.22)                            | 18,823 (39%)                                  | 0.2             | 24                | 75.9            | 758,762         | 281,746 (37%)          | 5333           | 356,746          | 396,683        | 25.8                | 15.9                  |
| Black or African American                 | 1,149,070 (1,126,327 - 1,171,812) | 1,377,386       | 228,316 (205,574 - 251,059)       | 549.11 (494.41 - 603.81)   | 1.20 (1.18 - 1.22)                            | 85,703 (38%)                                  | 3.9             | 42.6              | 53.4            | 4,289,225       | 1,816,586 (42%)        | 542,891        | 2,534,603        | 1,211,731      | 9.7                 | 18.6                  |
| Hispanic or Latino                        | 723,093 (703,422 - 742,764)       | 945,200         | 222,107 (202,436 - 241,778)       | 355.1 (323.65 - 386.55)    | 1.31 (1.27 - 1.34)                            | 133,815 (60%)                                 | 2.7             | 43.9              | 53.4            | 4,661,690       | 2,899,639 (62%)        | 395,015        | 2,993,509        | 1,273,166      | 13.4                | 20.8                  |
| More than one race                        | 47,367 (45,171 - 49,562)          | 53,023          | 5,656 (3,461 - 7,852)             | 72.47 (44.34 - 100.6)      | 1.12 (1.07 - 1.17)                            | 130 (2%)                                      | 0               | 60.2              | 39.8            | 135,194-186,408 | 9,201 (5%)             | -6557          | 160,808          | 32,157         | 41.9-57.7           | 21.1-29.1             |
| Native Hawaiian or Other Pacific Islander | 12,225 (11,892 - 12,557)          | 15,147          | 2,922 (2,590 - 3,255)             | 470.21 (416.76 - 523.67)   | 1.24 (1.21 - 1.27)                            | 1,388 (47%)                                   | 3.6             | 66.7              | 29.7            | 70,238-95,961   | 49,941 (52%)           | 7548           | 73,263           | 15,150         | 6.5-8.8             | 21.4-29.2             |
| White                                     | 7,028,654 (6,843,894 - 7,213,414) | 7,884,091       | 855,437 (670,677 - 1,040,197)     | 436.81 (342.47 - 531.15)   | 1.12 (1.09 - 1.15)                            | Reference                                     | 0.2             | 24.9              | 74.8            | 12,899,721      | Reference              | 136,959        | 6,743,271        | 6,019,491      | 15.2                | 14.4                  |
| All races                                 | 9,261,002 (9,048,489 - 9,473,516) | 10,643,433      | 1,382,431 (1,169,917 - 1,594,944) | 418.52 (354.18 - 482.85)   | 1.15 (1.12 - 1.18)                            | 252,389 (18%)                                 | 1.3             | 31.6              | 67.1            | 23,220,547      | 5,192,293 (22%)        | 1,104,723      | 13,104,482       | 9,011,342      | 14.2                | 16.2                  |

506  
507  
508

509 **Figure 1 (Panels A-D):**

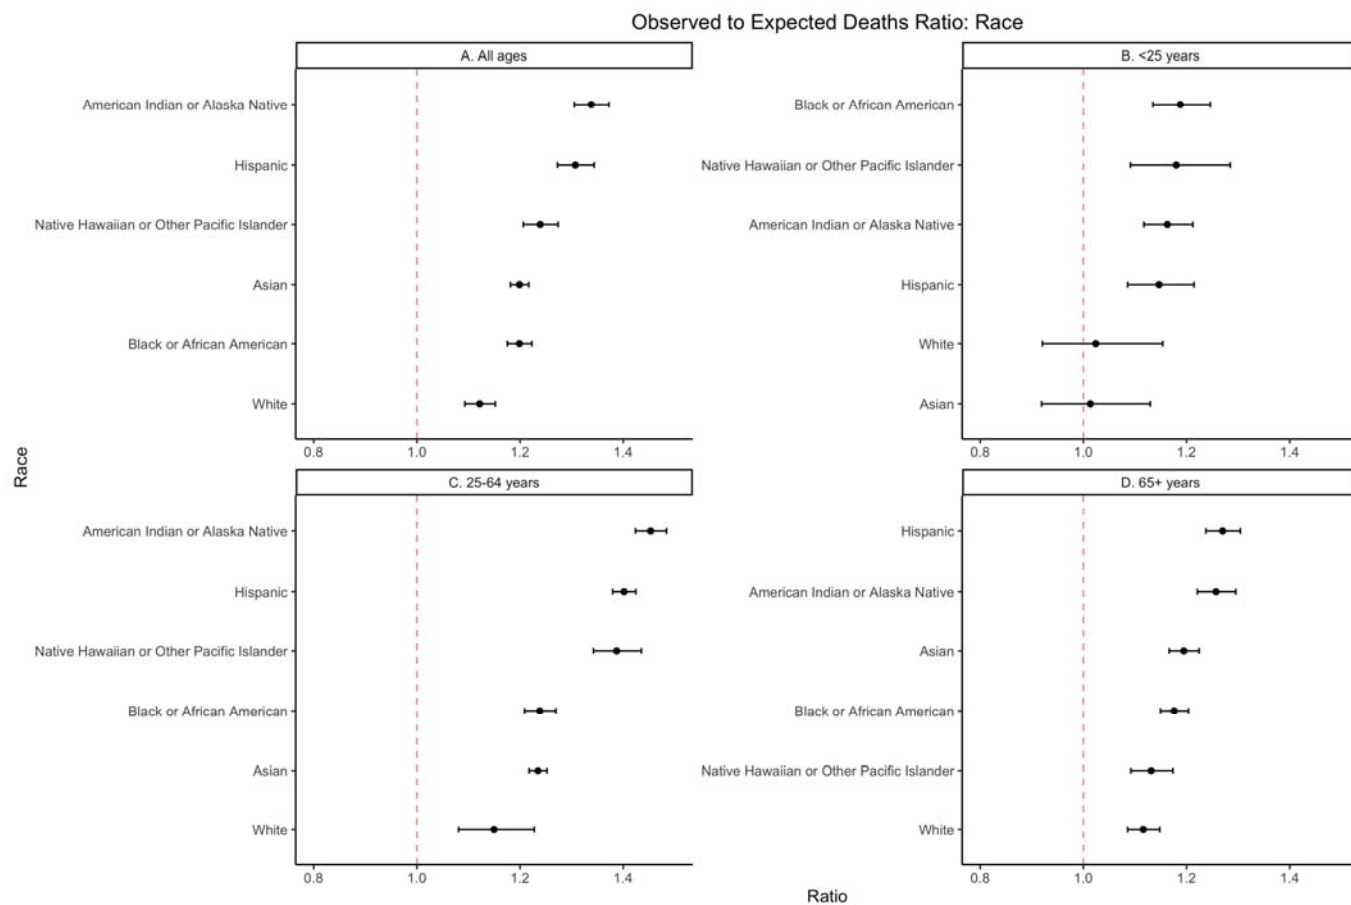

510

511

512

513

514

515

516

517

518

519

520

521

522

523

524

525

526  
527  
528

**Figure 2 (Panels A-D):**

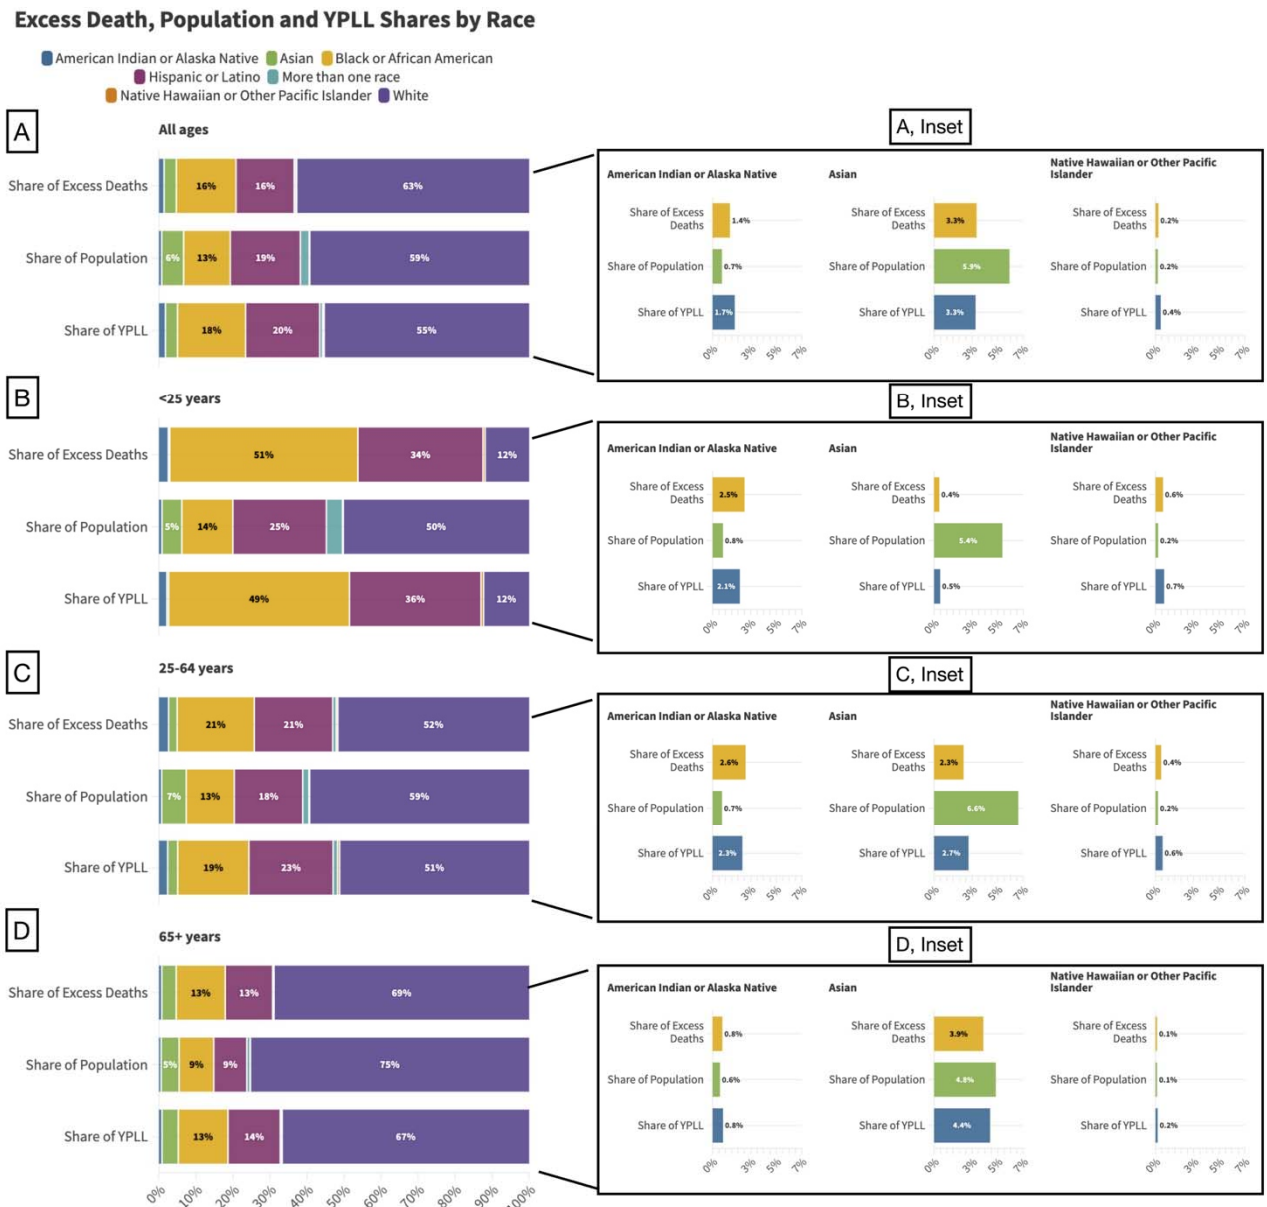

529  
530  
531  
532  
533  
534  
535  
536  
537



538 **Figure 3:**

**Excess and COVID Deaths by Race and Age: All Ages**

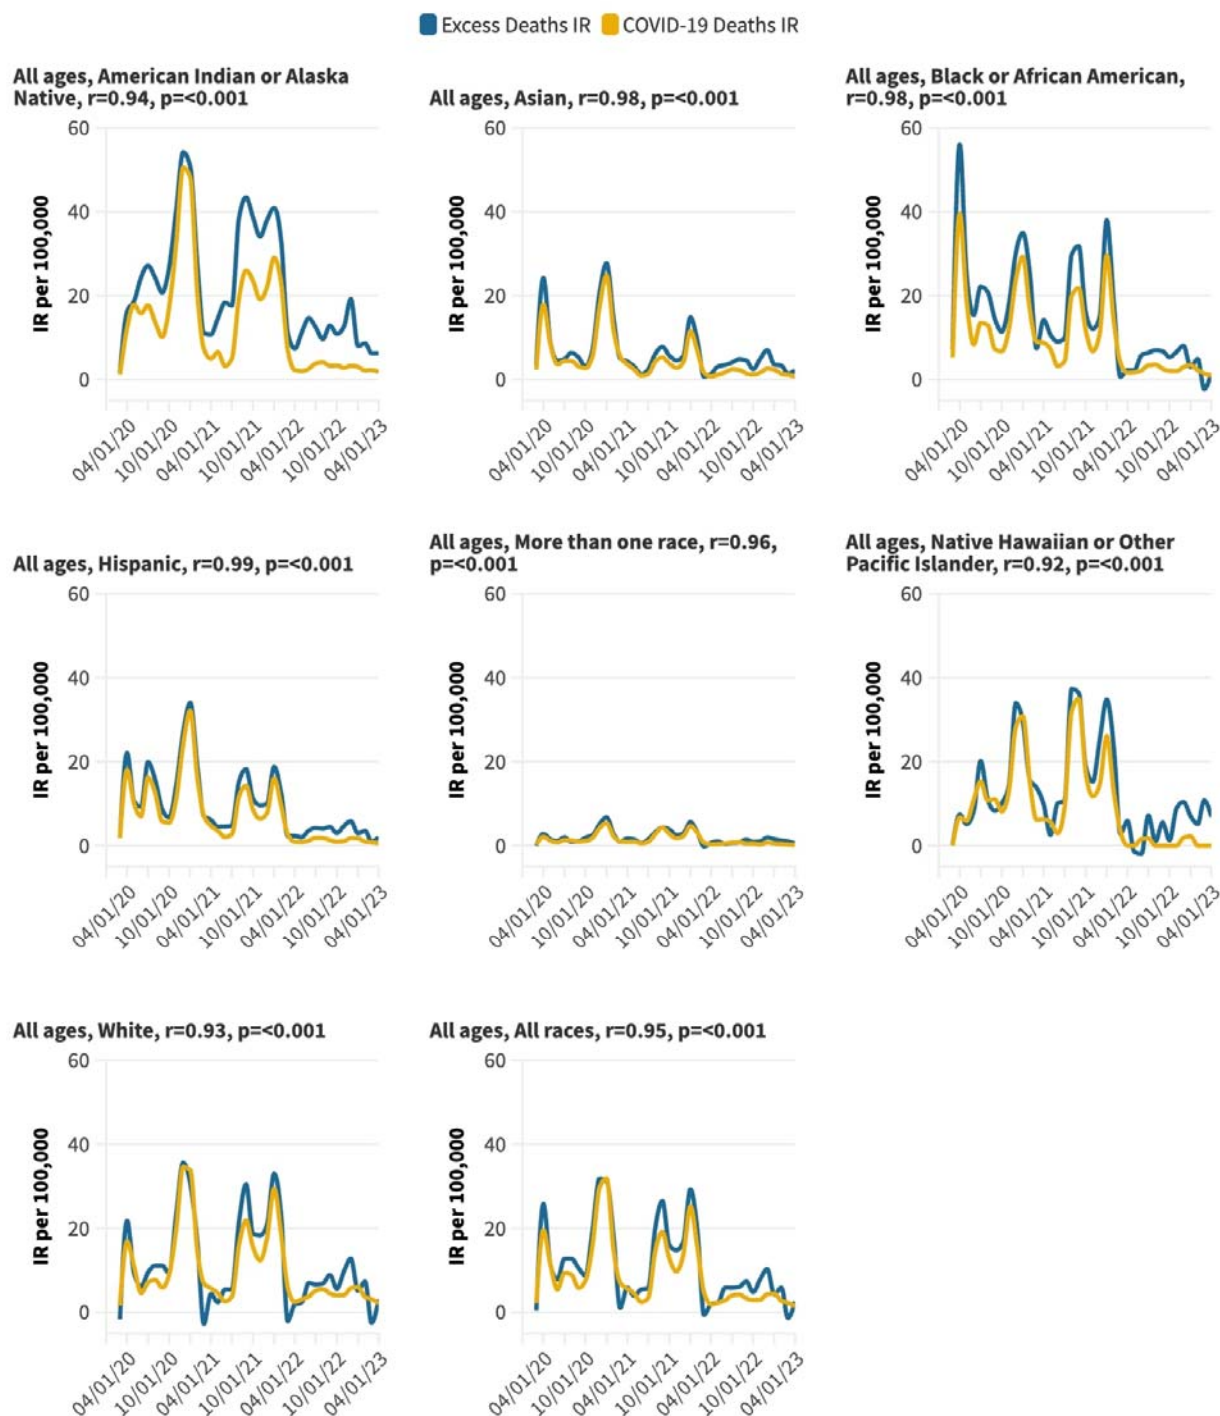

539

540 **Figure 4 (Panels A-L):**

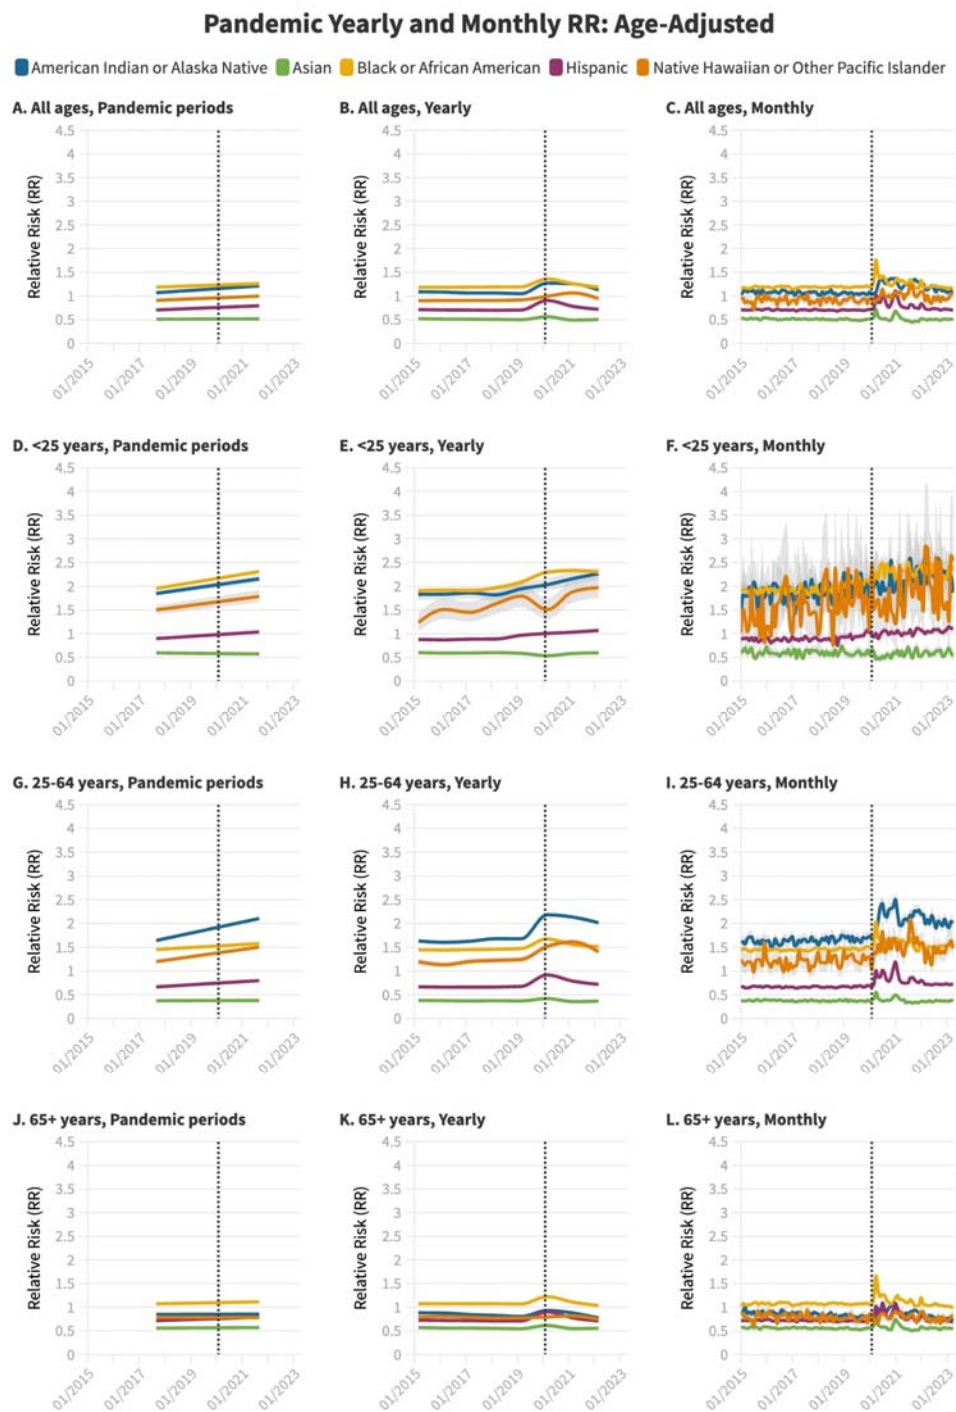

541

# All-cause mortality, excess deaths, and years of potential life lost by race/ethnicity

| Race                                      | Expected deaths (95% CI)          | Observed Deaths | Excess deaths, no (95% CI)        | Excess deaths, IR (95% CI) | Ratio of observed to expected deaths (95% CI) | Potential Deaths Averted - White as Reference | <25 years share | 25-64 years share | 65+ years share | YPLL            | Potential YPLL Averted | <25 years YPLL | 25-64 years YPLL | 65+ years YPLL | Population per YPLL | YPLL per Excess Death |
|-------------------------------------------|-----------------------------------|-----------------|-----------------------------------|----------------------------|-----------------------------------------------|-----------------------------------------------|-----------------|-------------------|-----------------|-----------------|------------------------|----------------|------------------|----------------|---------------------|-----------------------|
| American Indian or Alaska Native          | 59,203 (57,717 - 60,689)          | 79,214          | 20,011 (18,525 - 21,497)          | 822.25 (761.2 - 883.31)    | 1.34 (1.31 - 1.37)                            | 12,529 (63%)                                  | 2.2             | 58.3              | 39.5            | 405,716         | 268,796 (66%)          | 23,774         | 308,062          | 73,880         | 6                   | 20.8                  |
| Asian                                     | 241,391 (237,821 - 244,961)       | 289,372         | 47,981 (44,411 - 51,551)          | 246.15 (227.84 - 264.47)   | 1.20 (1.18 - 1.22)                            | 18,823 (39%)                                  | 0.2             | 24                | 75.9            | 758,762         | 281,746 (37%)          | 5333           | 356,746          | 396,683        | 25.8                | 15.9                  |
| Black or African American                 | 1,149,070 (1,120,222 - 1,171,812) | 1,510,000       | 228,316 (203,574 - 251,059)       | 549.11 (494.41 - 603.81)   | 1.20 (1.18 - 1.22)                            | 85,703 (38%)                                  | 3.9             | 42.6              | 53.4            | 4,289,225       | 1,816,586 (42%)        | 542,891        | 2,534,603        | 1,211,731      | 9.7                 | 18.6                  |
| Hispanic or Latino                        | 723,093 (703,422 - 742,764)       | 945,200         | 222,107 (202,436 - 241,778)       | 355.1 (323.65 - 386.55)    | 1.31 (1.27 - 1.34)                            | 133,815 (60%)                                 | 2.7             | 43.9              | 53.4            | 4,661,690       | 2,899,639 (62%)        | 395,015        | 2,993,509        | 1,273,166      | 13.4                | 20.8                  |
| More than one race                        | 47,367 (45,171 - 49,562)          | 53,023          | 5,656 (3,461 - 7,852)             | 72.47 (44.34 - 100.6)      | 1.12 (1.07 - 1.17)                            | 130 (2%)                                      | 0               | 60.2              | 39.8            | 135,194-186,408 | 9,201 (5%)             | -6557          | 160,808          | 32,157         | 41.9-57.7           | 21.1-29.1             |
| Native Hawaiian or Other Pacific Islander | 12,225 (11,892 - 12,557)          | 15,147          | 2,922 (2,590 - 3,255)             | 470.21 (416.76 - 523.67)   | 1.24 (1.21 - 1.27)                            | 1,388 (47%)                                   | 3.6             | 66.7              | 29.7            | 70,238-95,961   | 49,941 (52%)           | 7548           | 73,263           | 15,150         | 6.5-8.8             | 21.4-29.2             |
| White                                     | 7,028,654 (6,843,894 - 7,213,414) | 7,884,091       | 855,437 (670,677 - 1,040,197)     | 436.81 (342.47 - 531.15)   | 1.12 (1.09 - 1.15)                            | Reference                                     | 0.2             | 24.9              | 74.8            | 12,899,721      | Reference              | 136,959        | 6,743,271        | 6,019,491      | 15.2                | 14.4                  |
| All races                                 | 9,261,002 (9,048,489 - 9,473,516) | 10,643,433      | 1,382,431 (1,169,917 - 1,594,944) | 418.52 (354.18 - 482.85)   | 1.15 (1.12 - 1.18)                            | 252,389 (18%)                                 | 1.3             | 31.6              | 67.1            | 23,220,547      | 5,192,293 (22%)        | 1,104,723      | 13,104,482       | 9,011,342      | 14.2                | 16.2                  |

medRxiv preprint doi: <https://doi.org/10.1101/2024.03.01.24303592>; this version posted March 2, 2024. The copyright holder for this preprint (which was not certified by peer review) is the author/funder, who has granted medRxiv a license to display the preprint in perpetuity. It is made available under a [CC-BY-NC-ND 4.0 International license](https://creativecommons.org/licenses/by-nc-nd/4.0/).

# Observed to Expected Deaths Ratio: Race

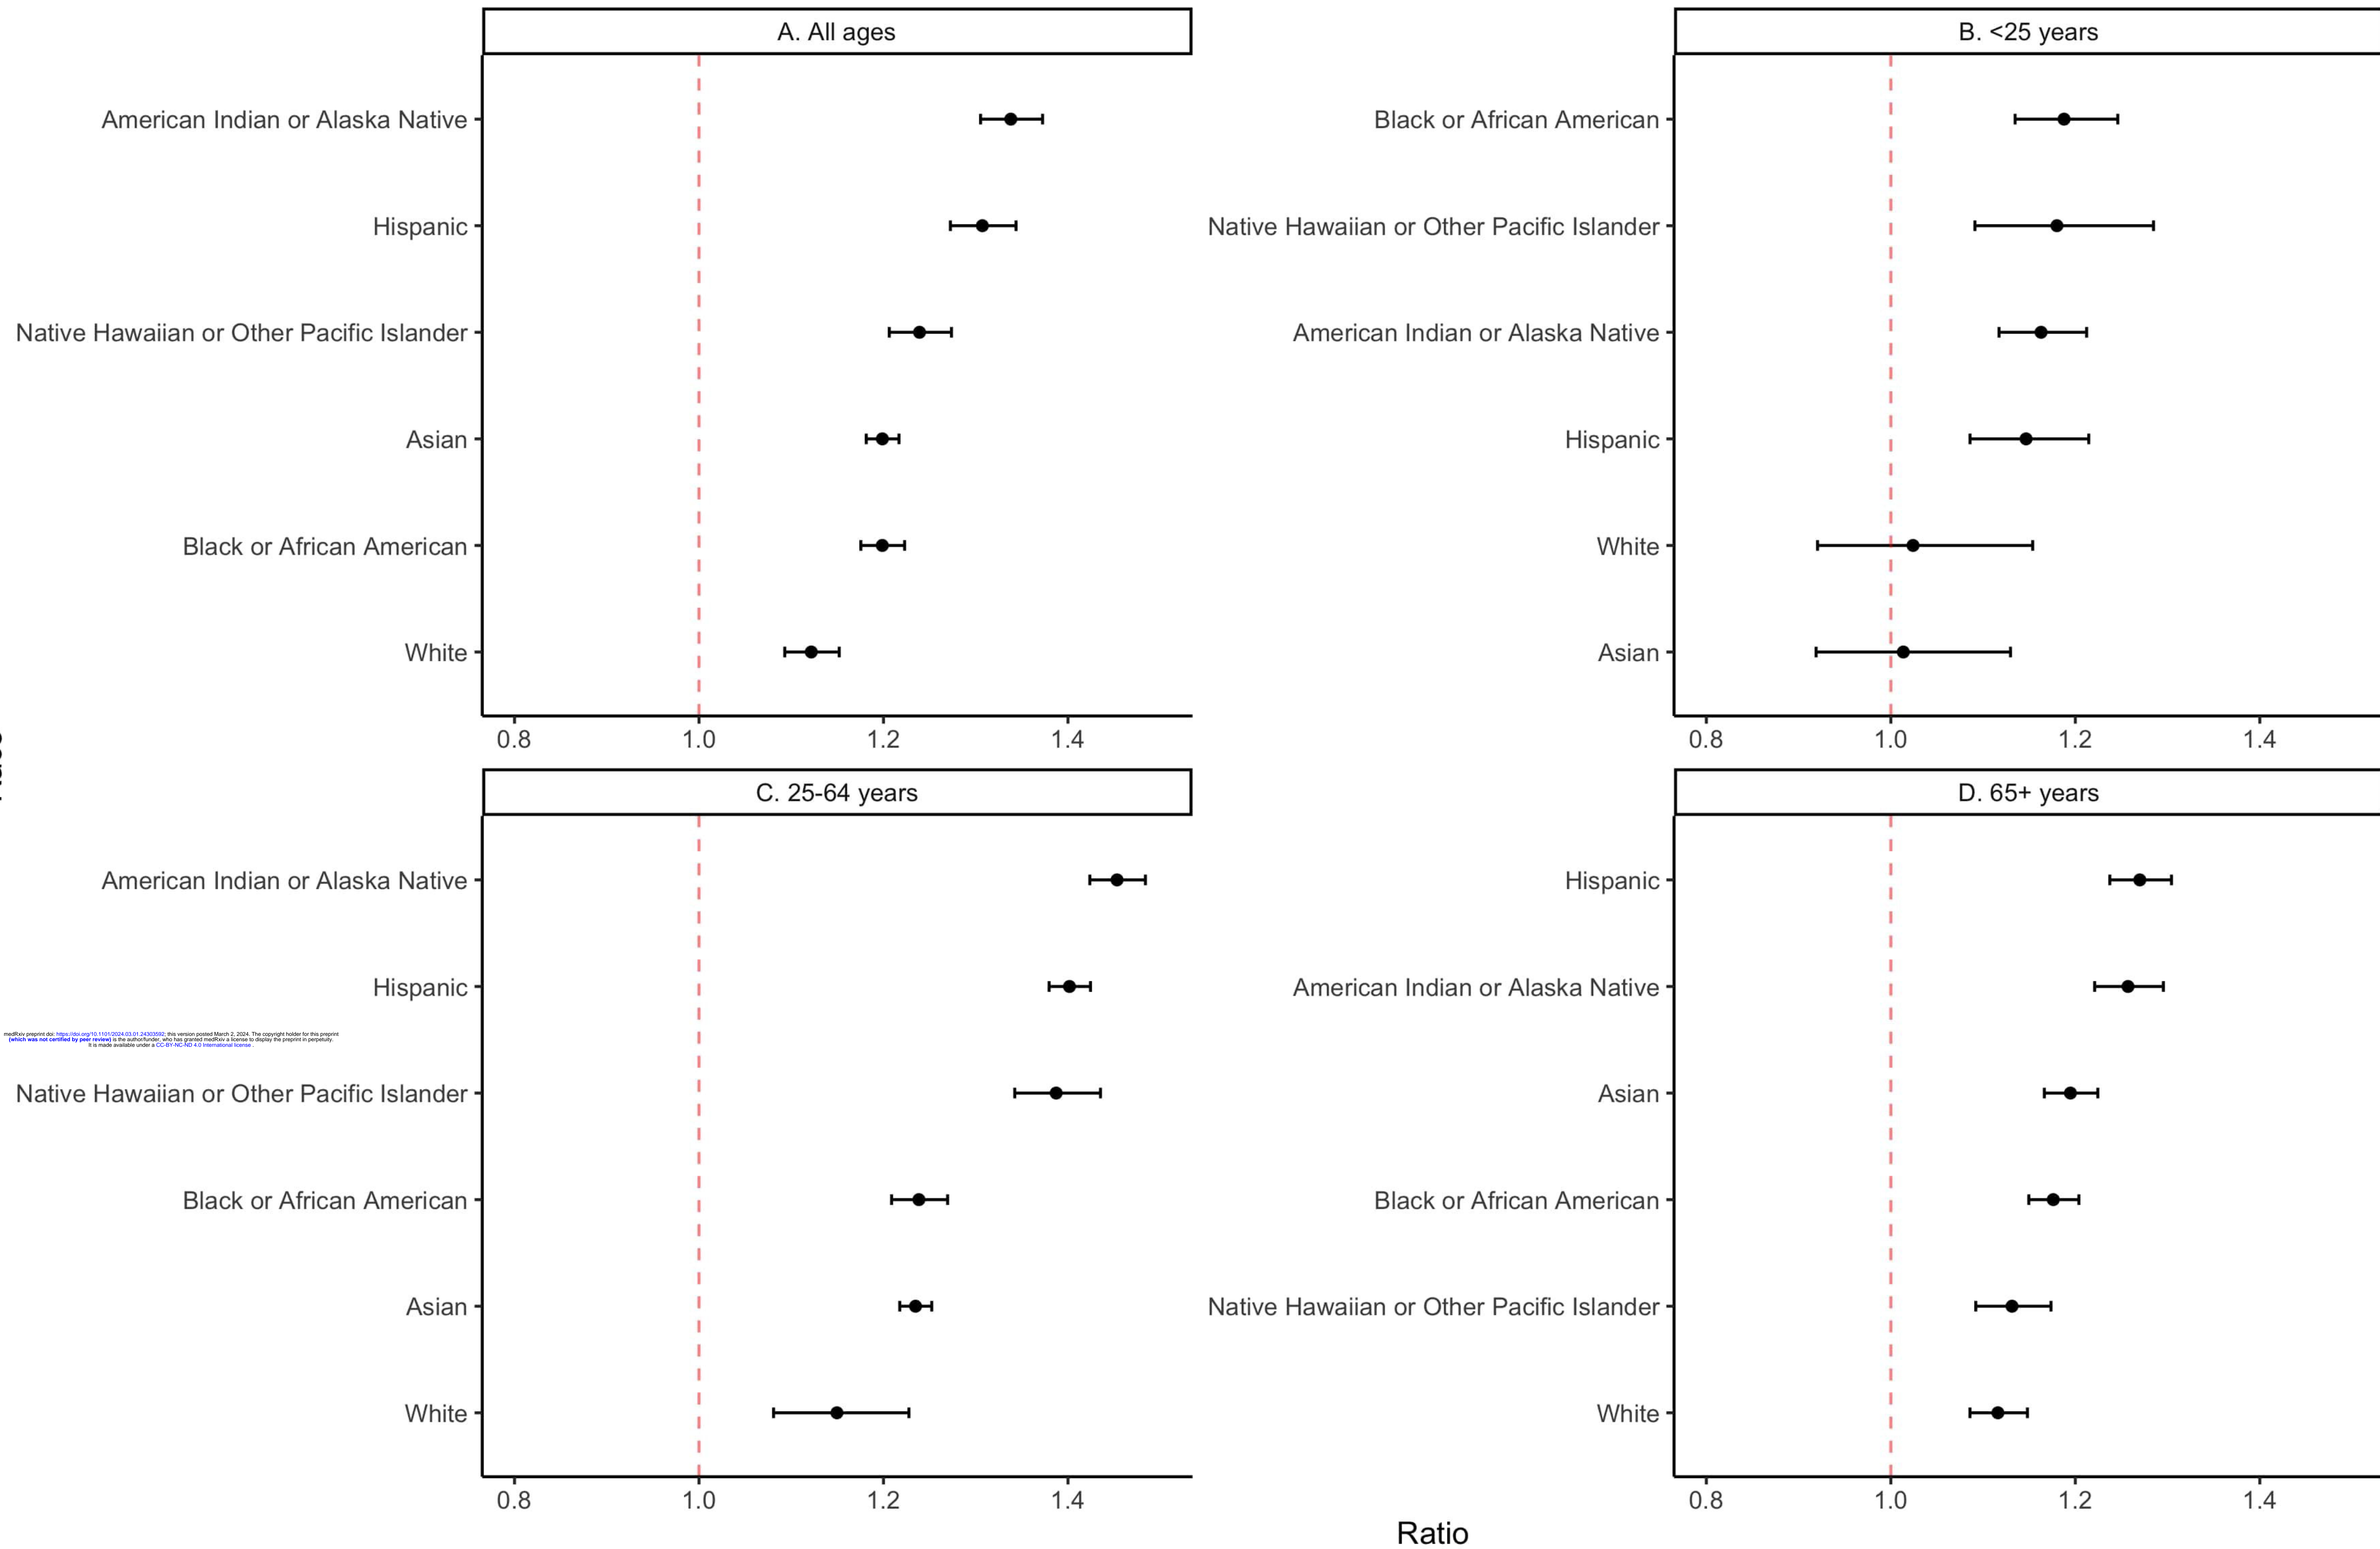

medRxiv preprint doi: <https://doi.org/10.1101/2024.03.01.24023902>; this version posted March 5, 2024. The copyright holder for this preprint (which was not certified by peer review) is the author/funder, who has granted medRxiv a license to display the preprint in perpetuity. It is made available under a CC-BY-NC-ND 4.0 International license.

# Excess Death, Population and YPLL Shares by Race

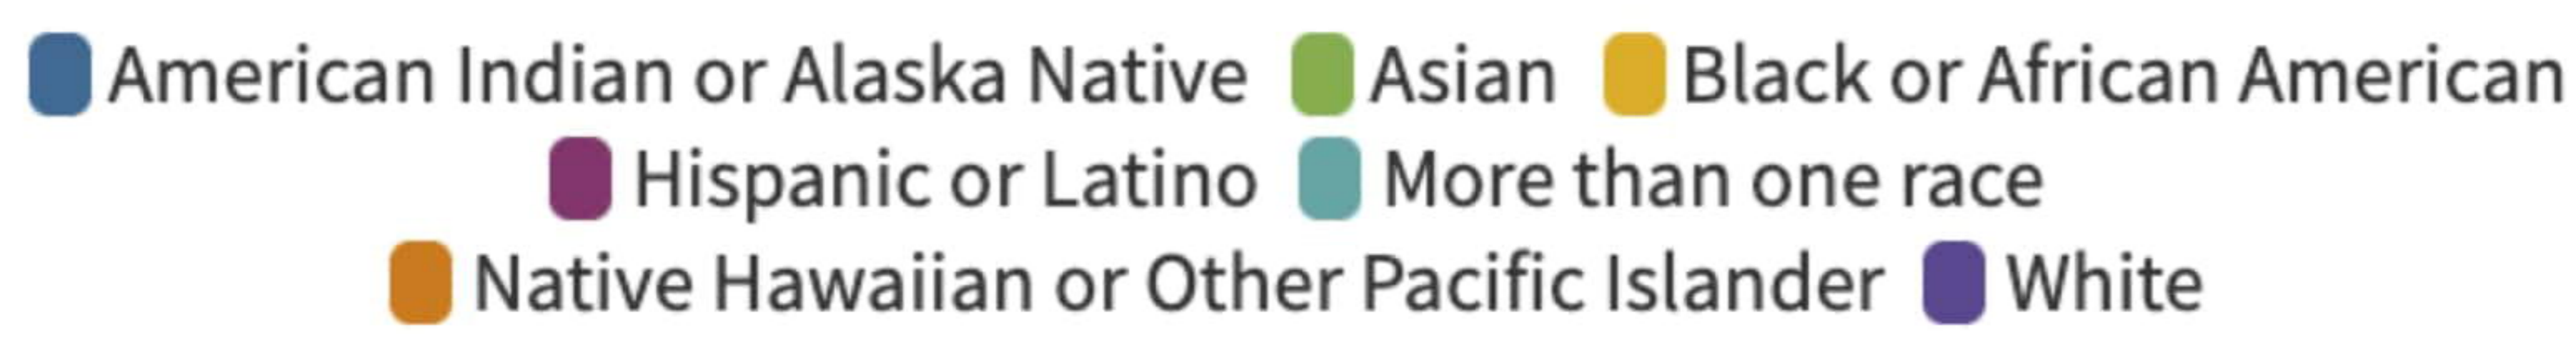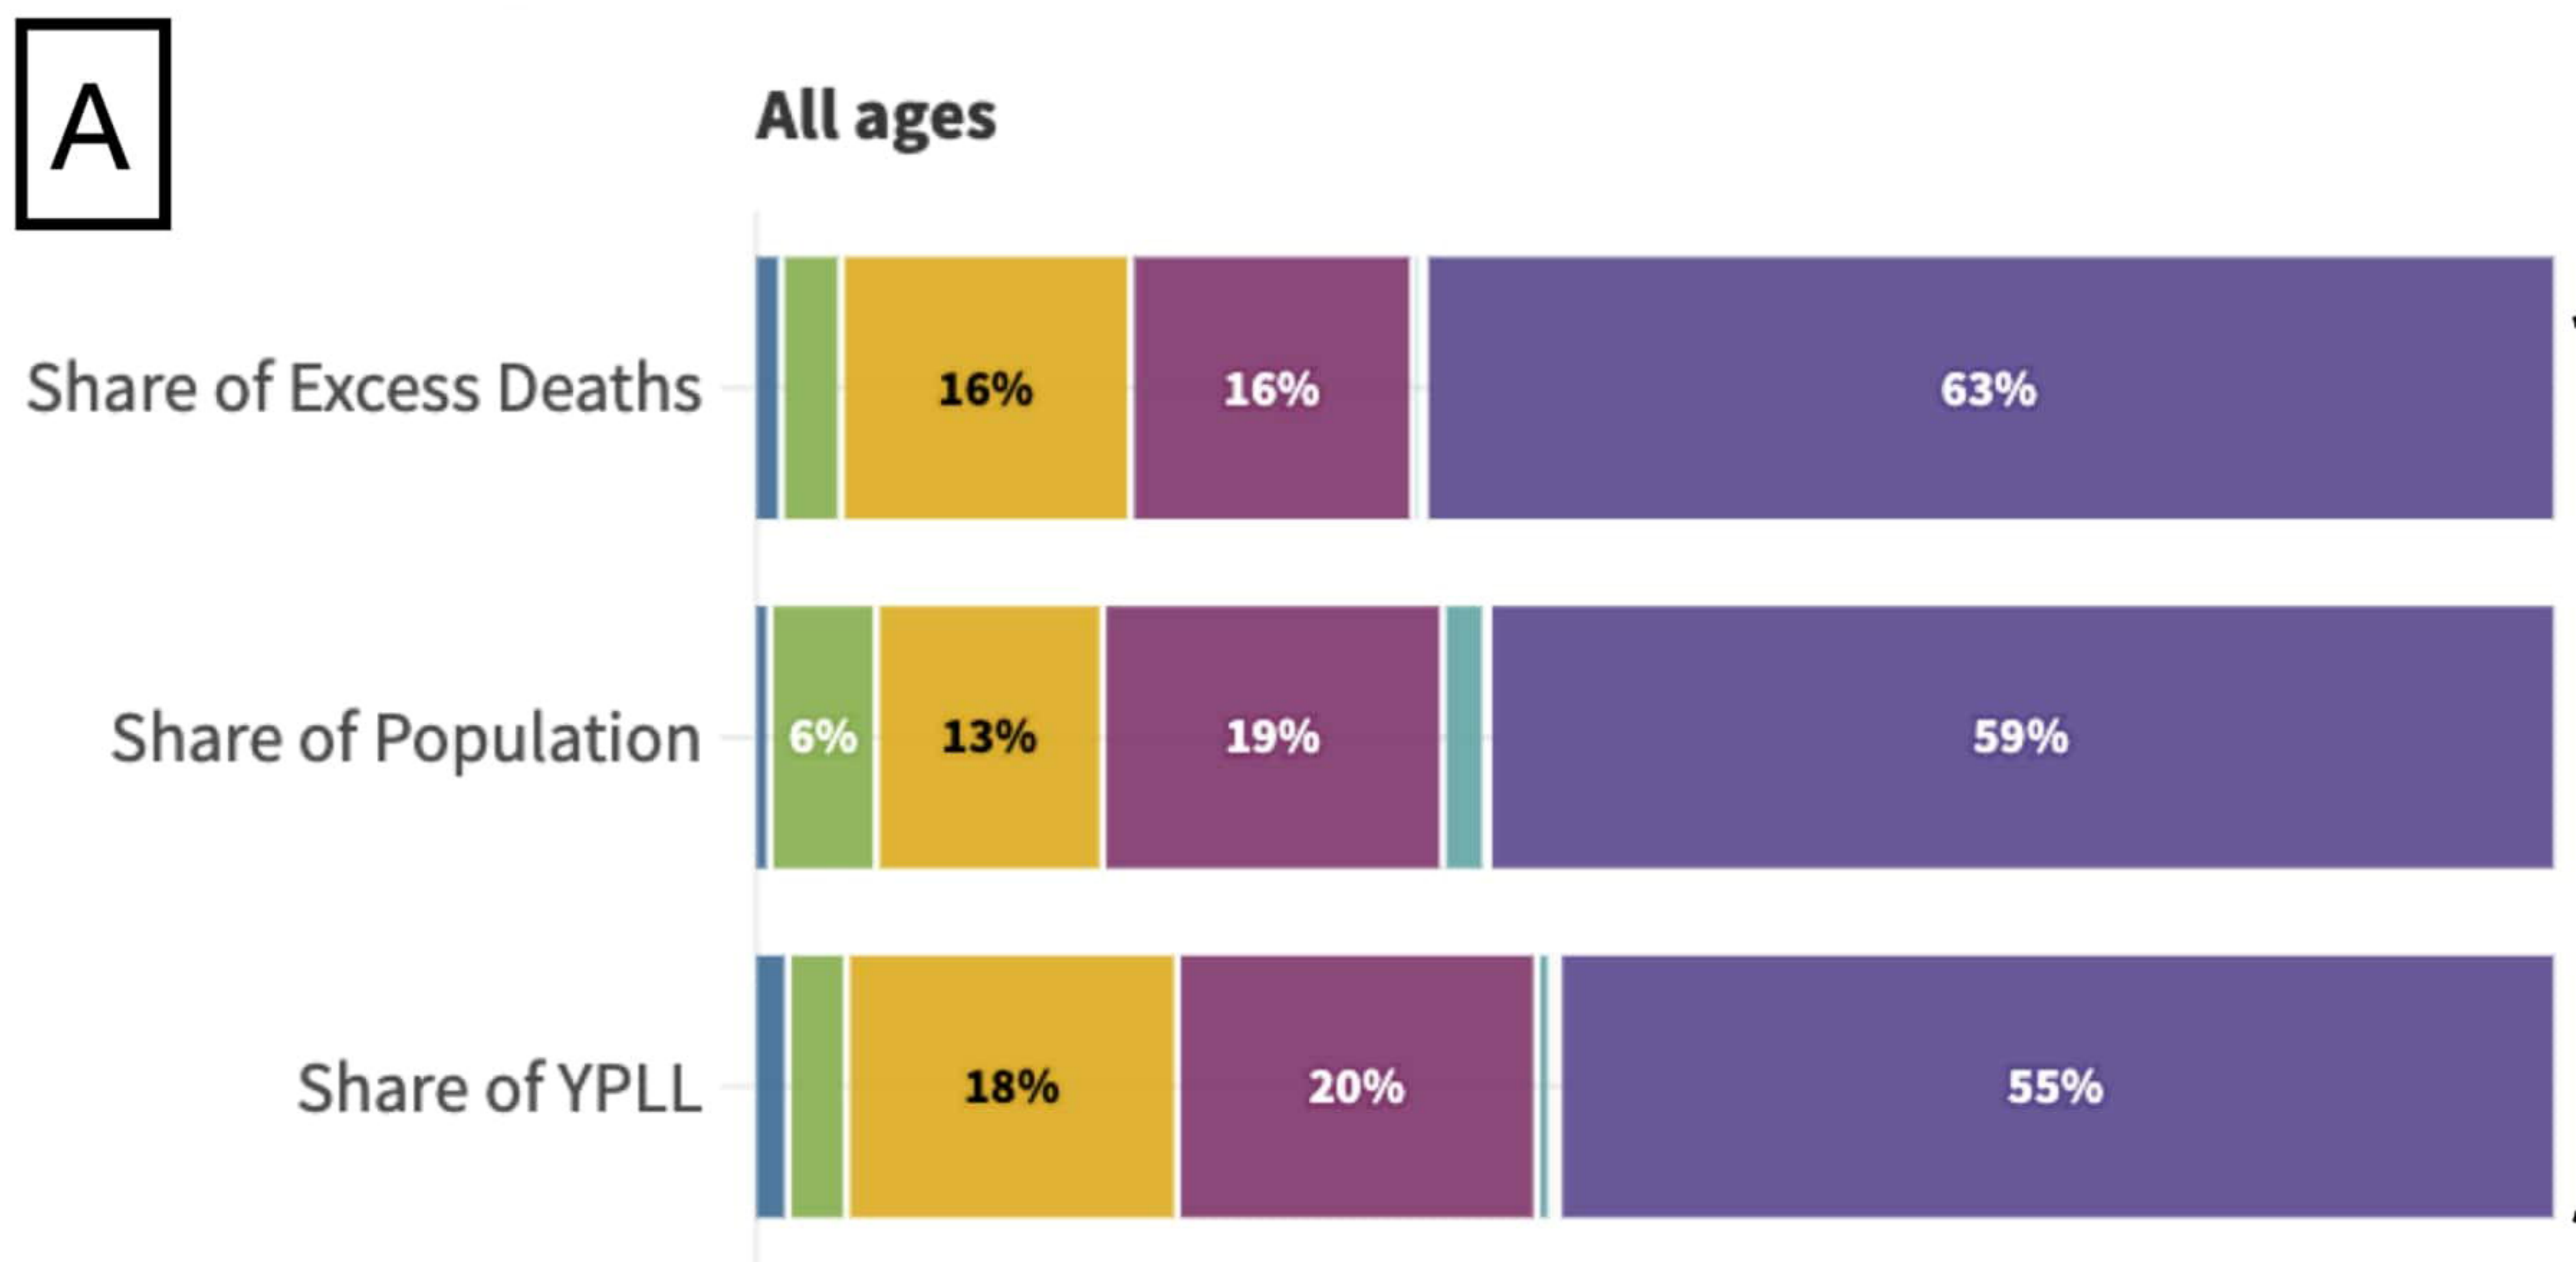

**A, Inset**

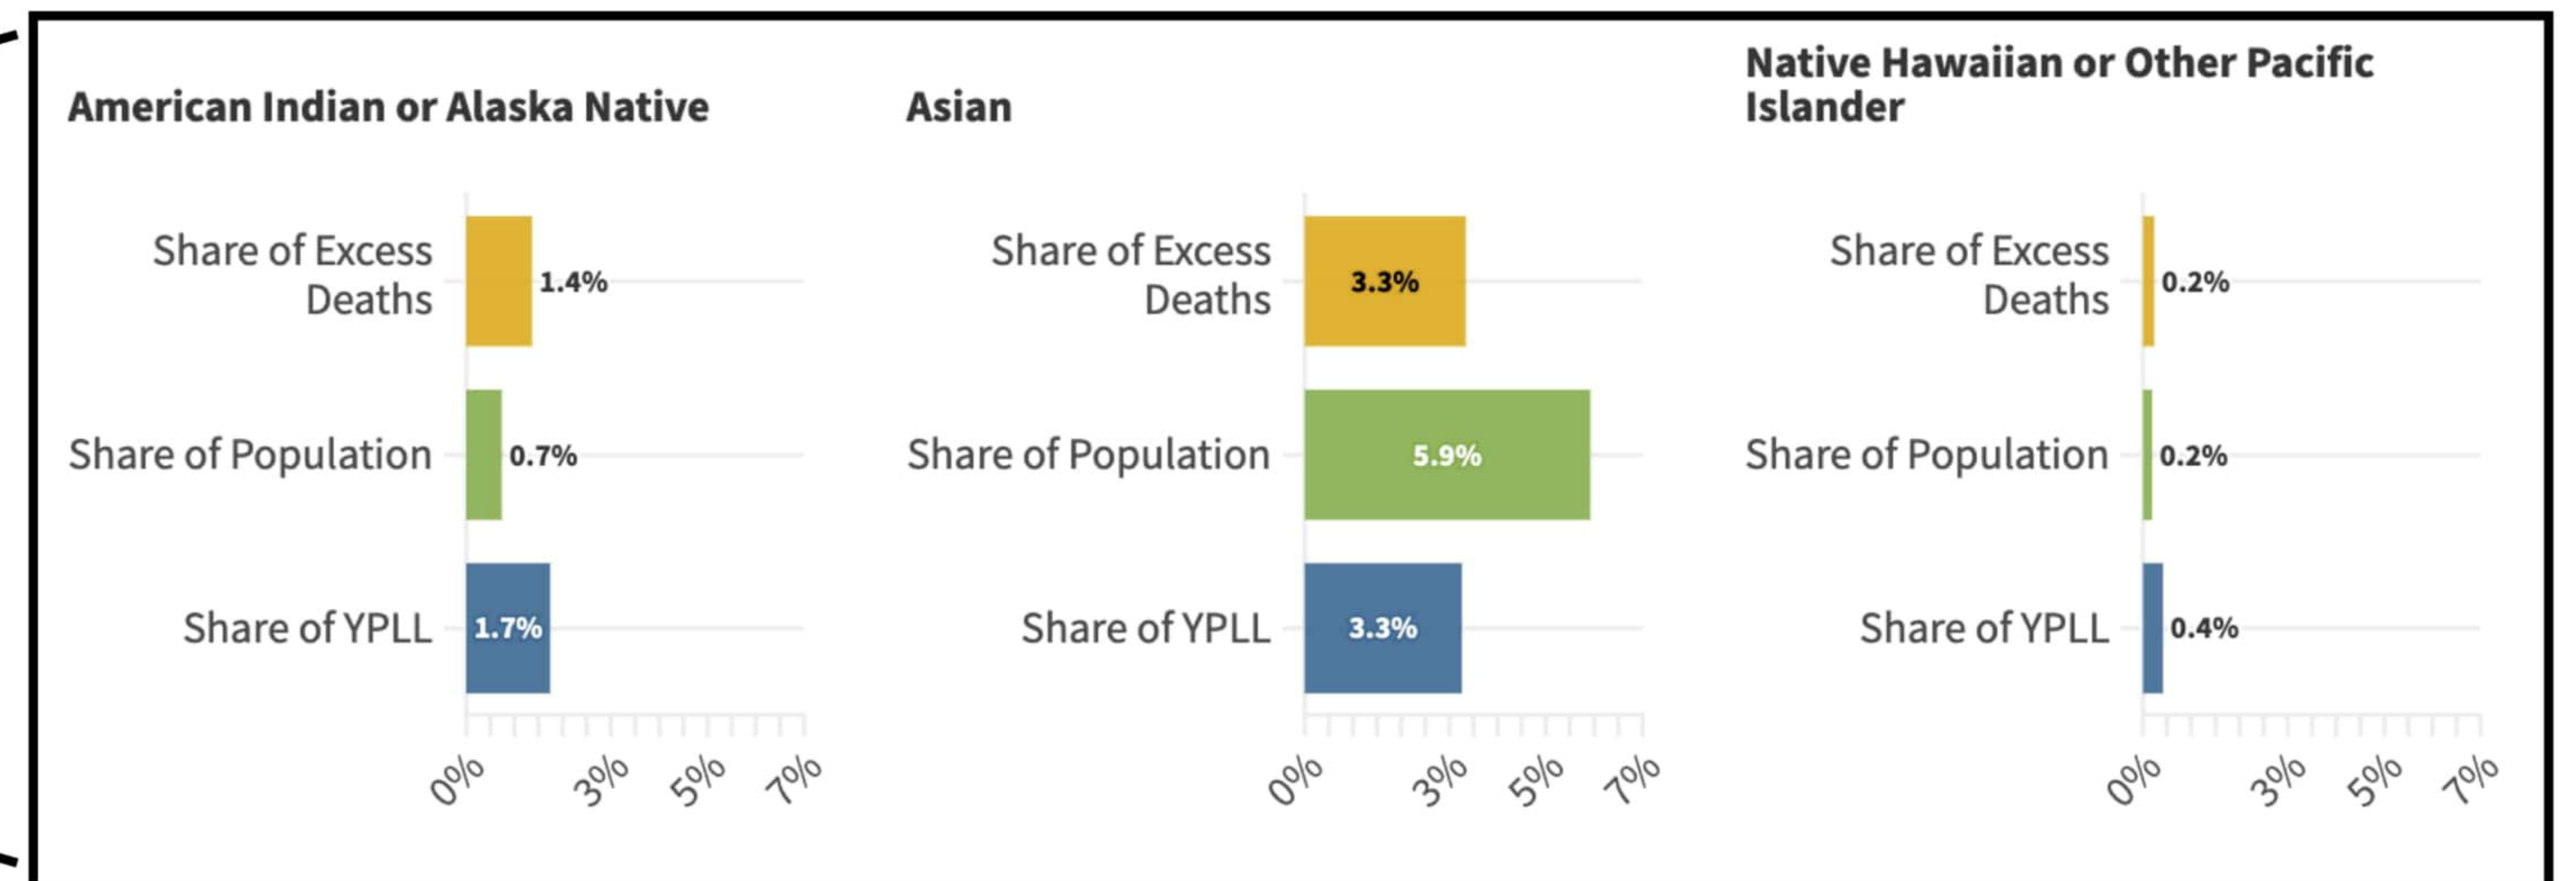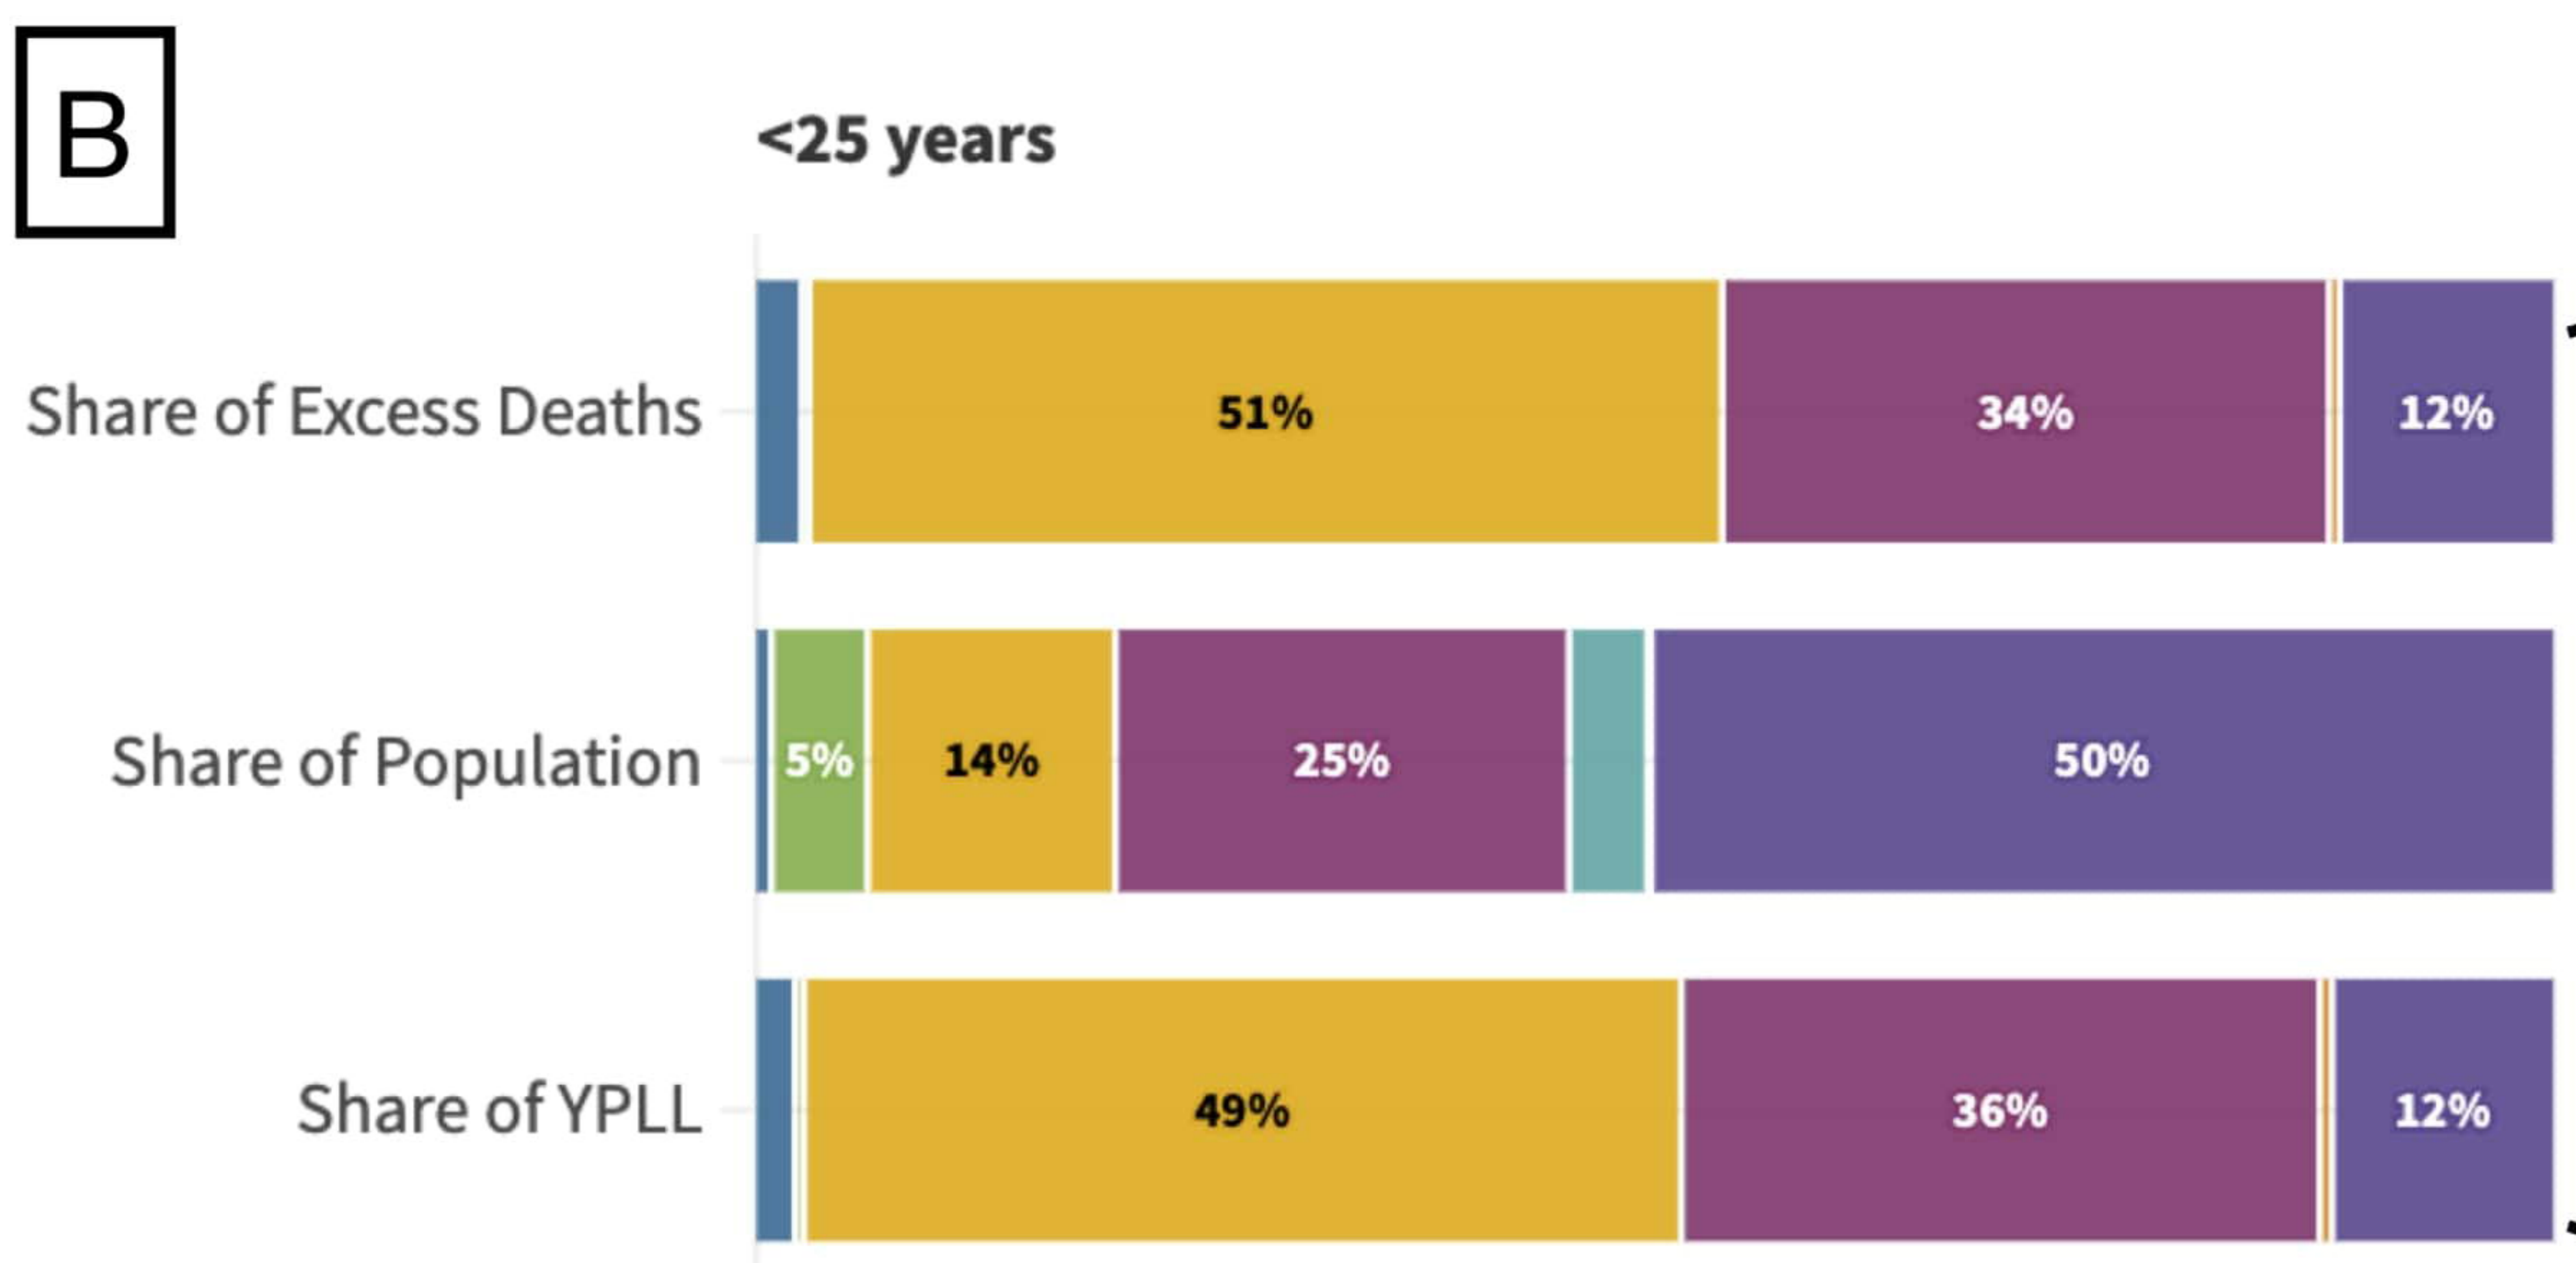

**B, Inset**

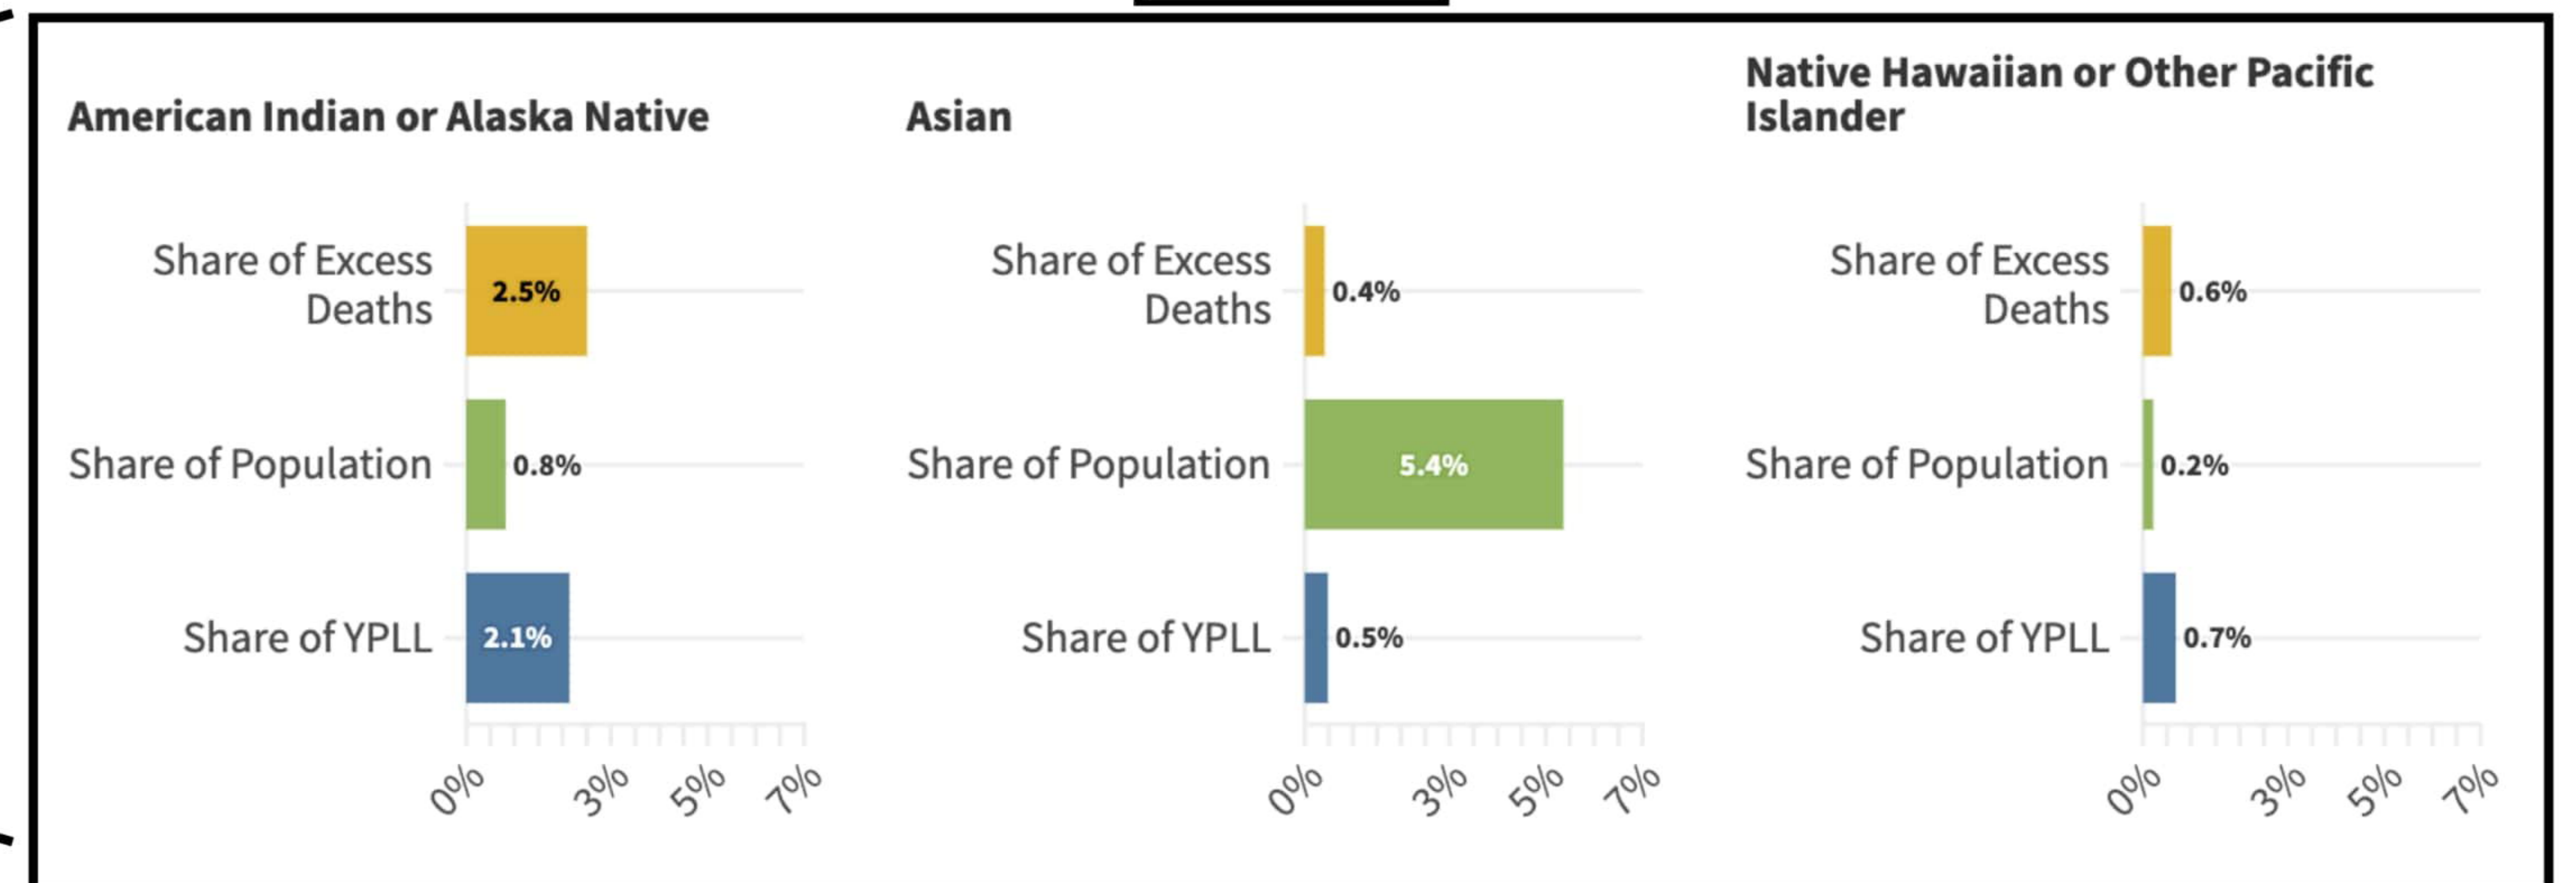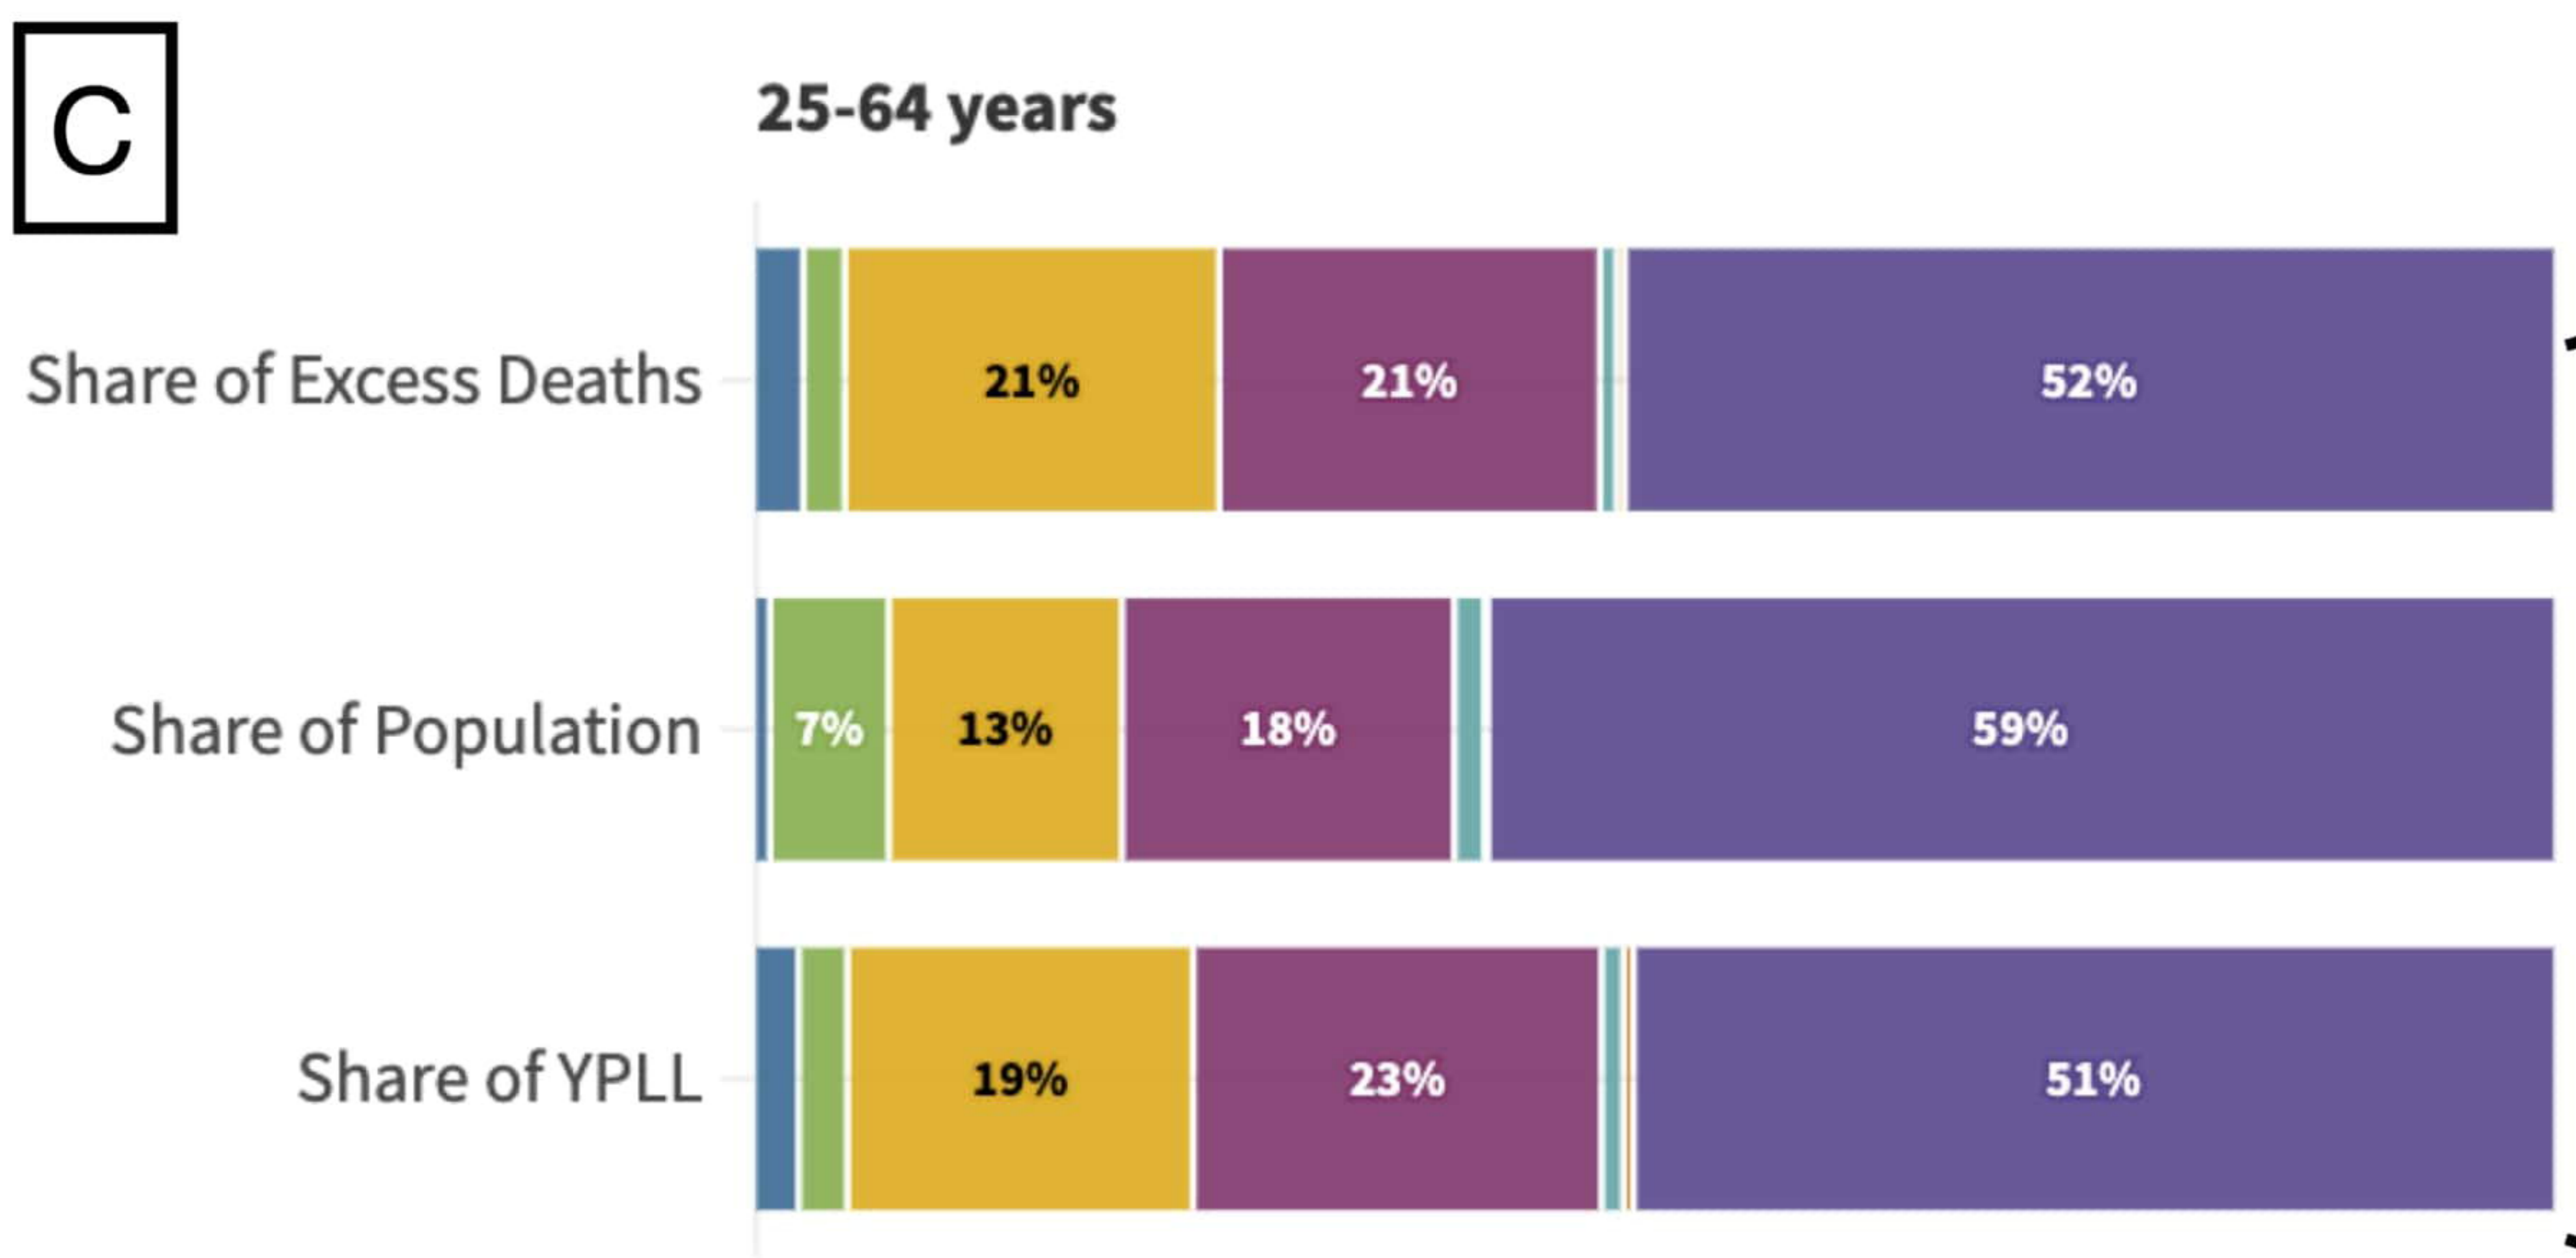

**C, Inset**

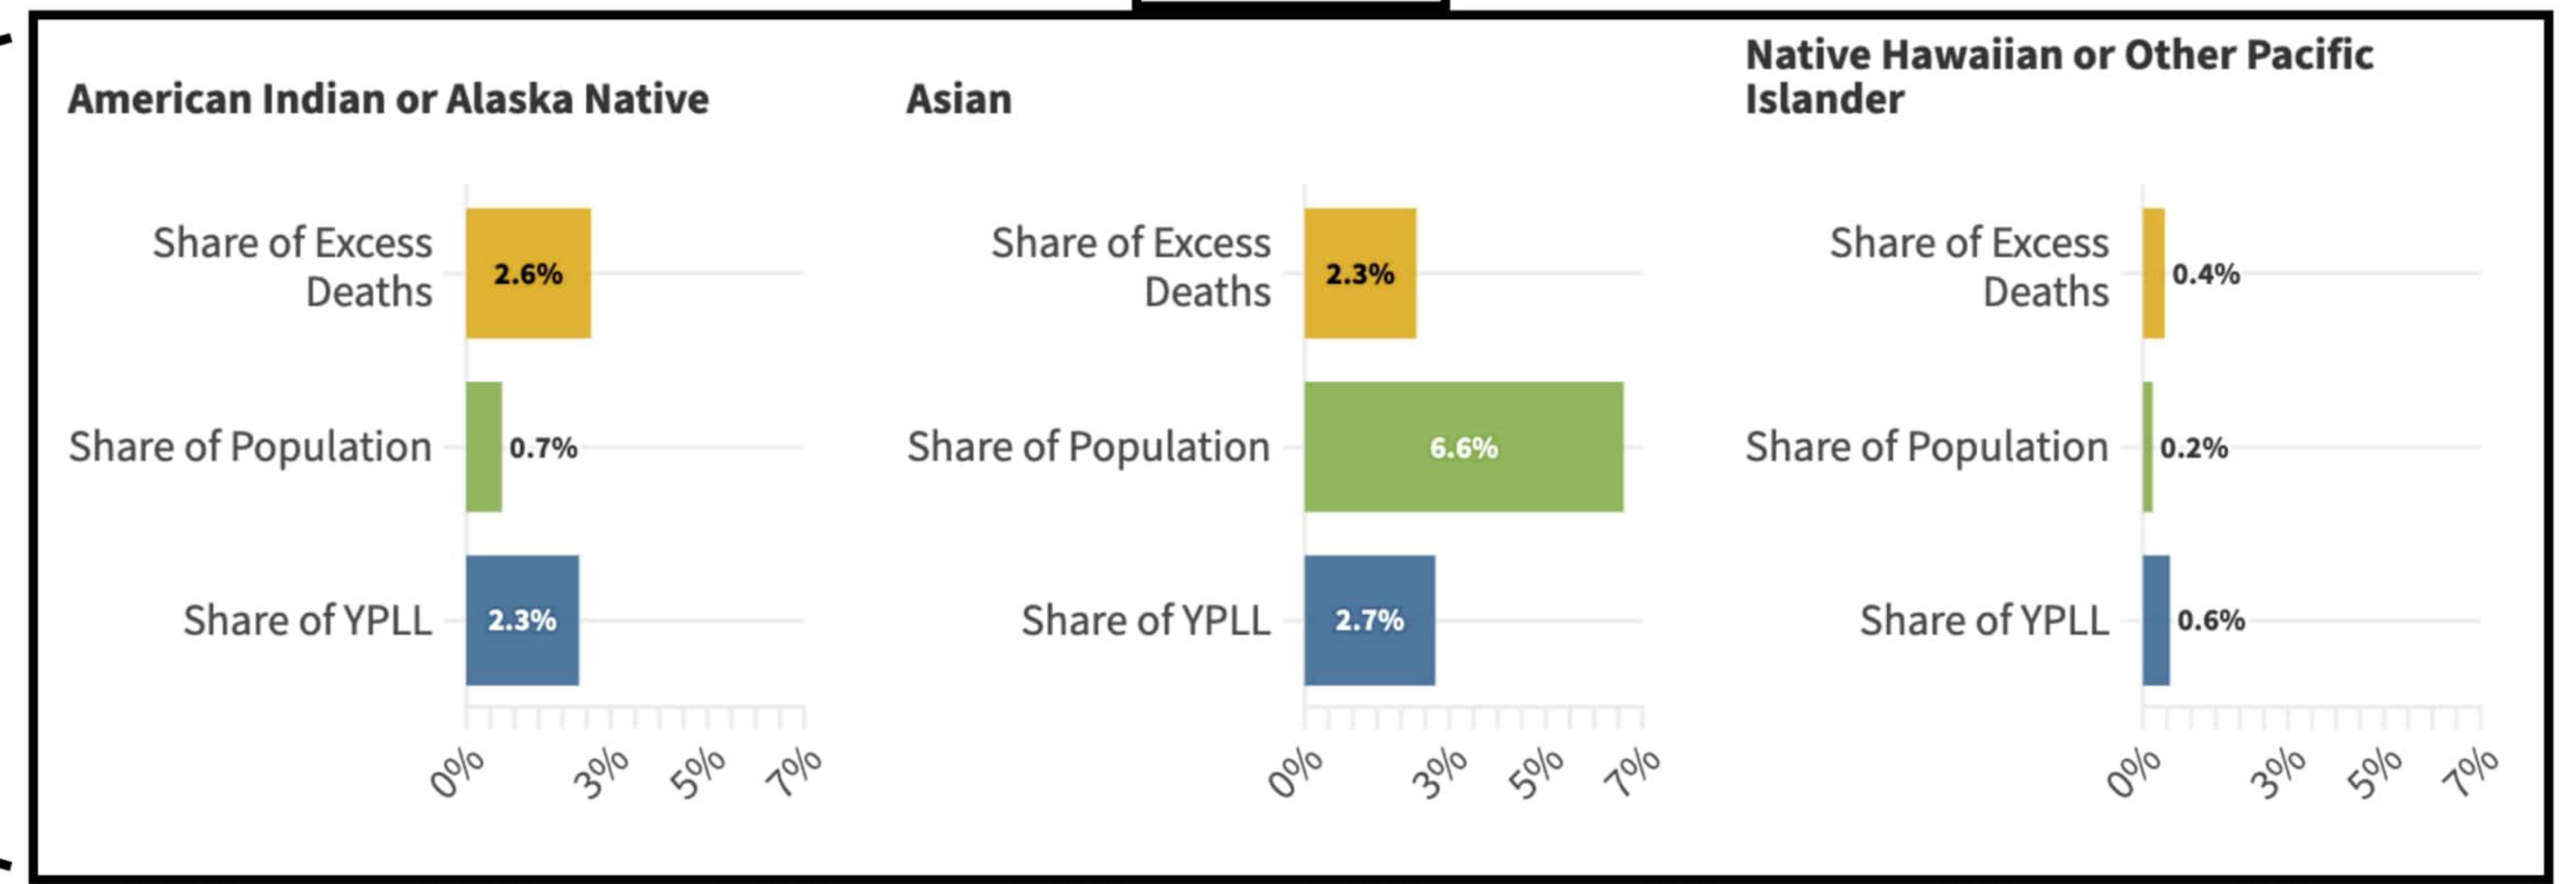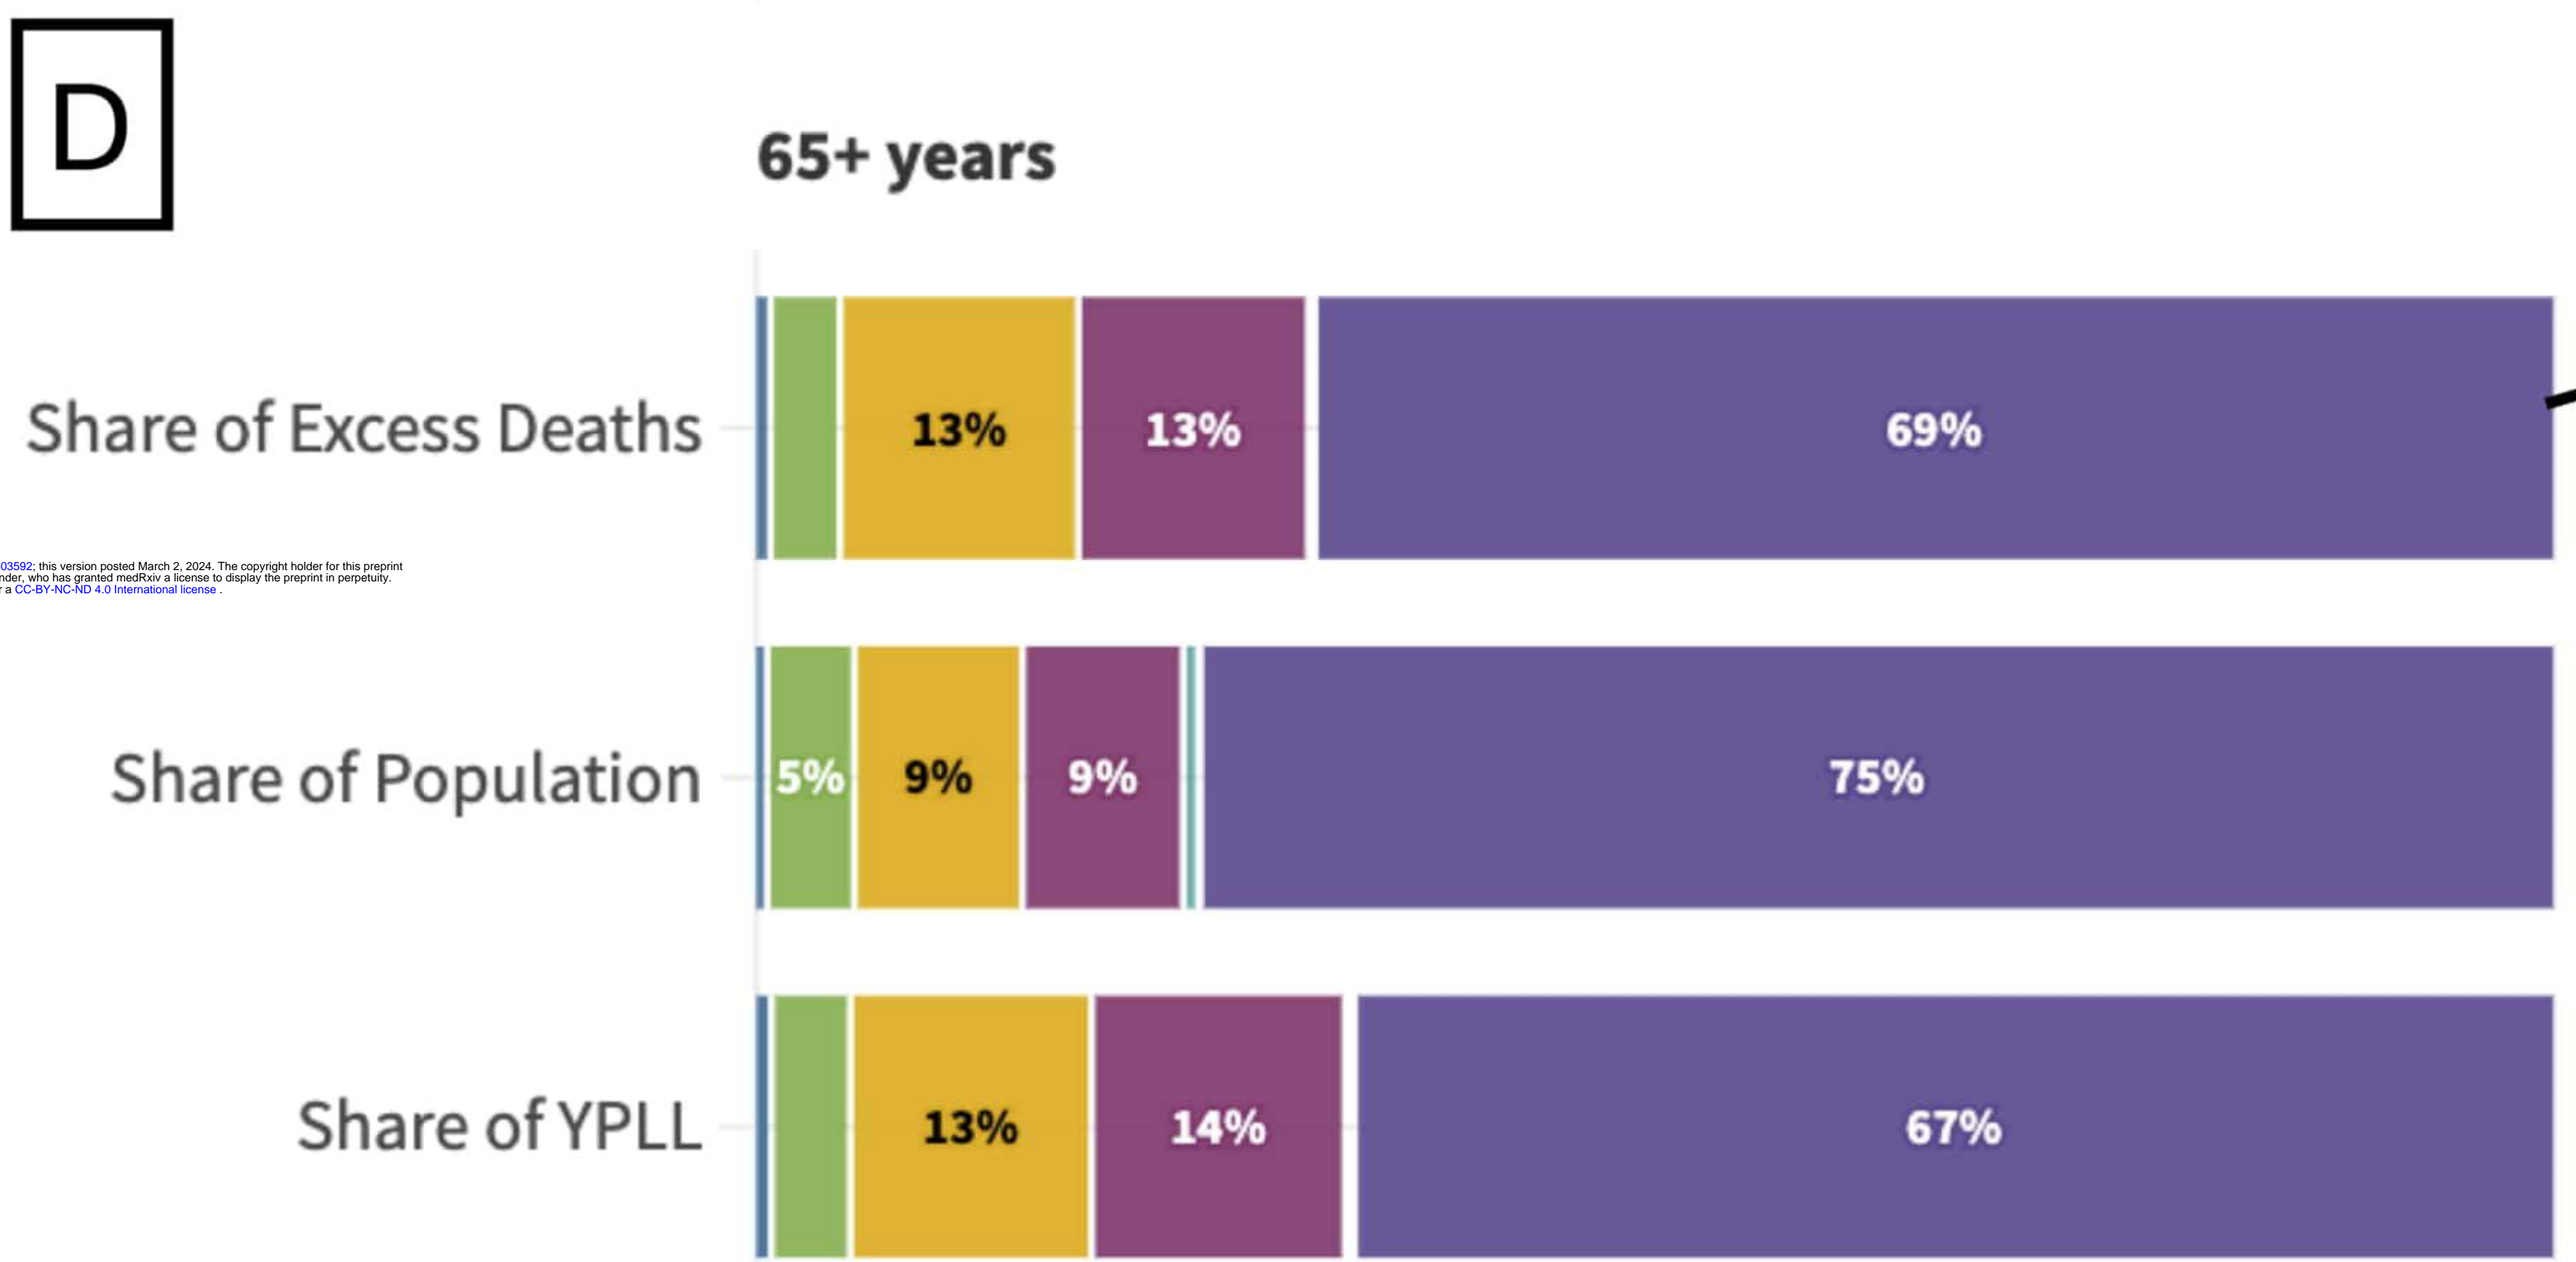

**D, Inset**

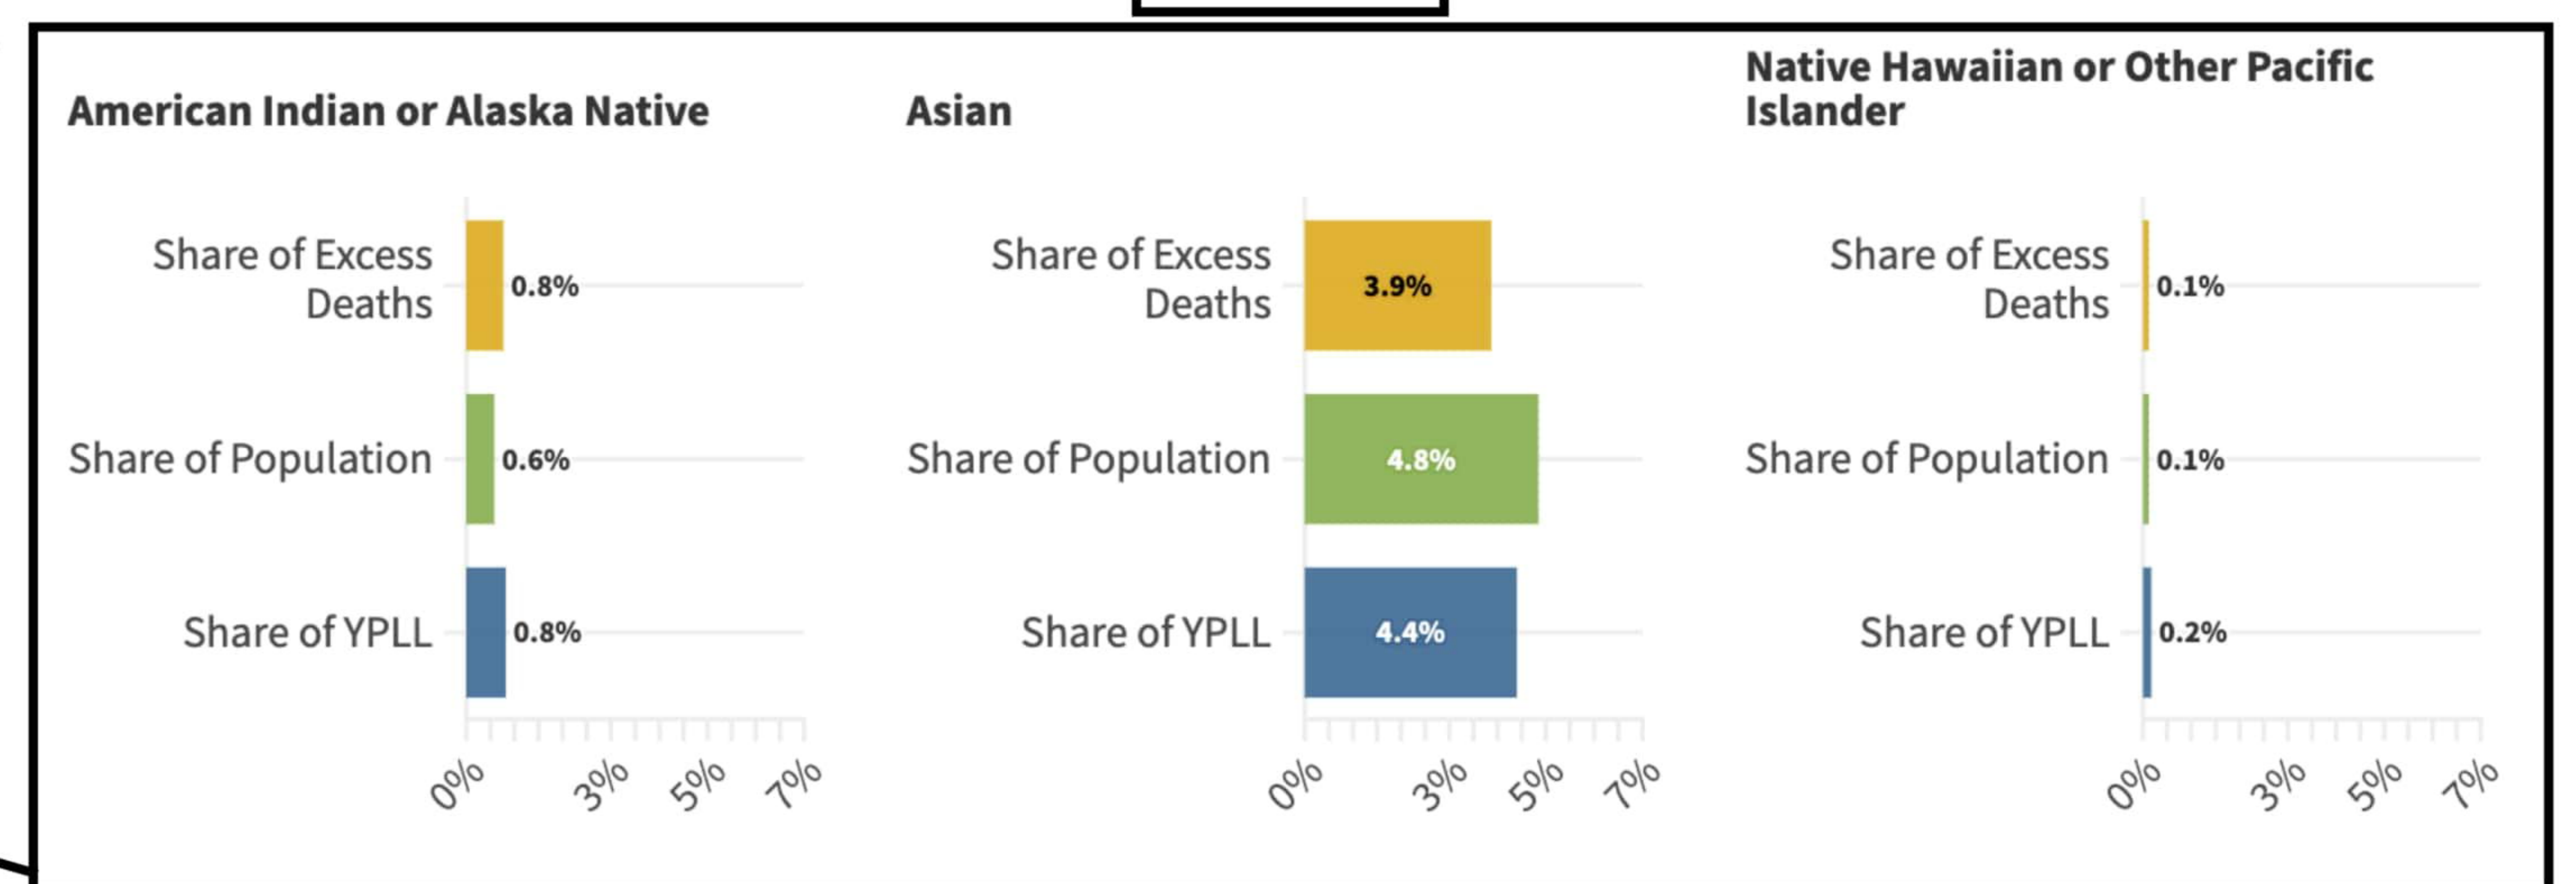

Healthcare reported on 10/15/2020. This report was prepared on 10/15/2020. The data is preliminary and subject to change. The data is preliminary and subject to change. The data is preliminary and subject to change.

# Excess and COVID Deaths by Race and Age: All Ages

■ Excess Deaths IR ■ COVID-19 Deaths IR

All ages, American Indian or Alaska Native,  $r=0.94$ ,  $p<0.001$

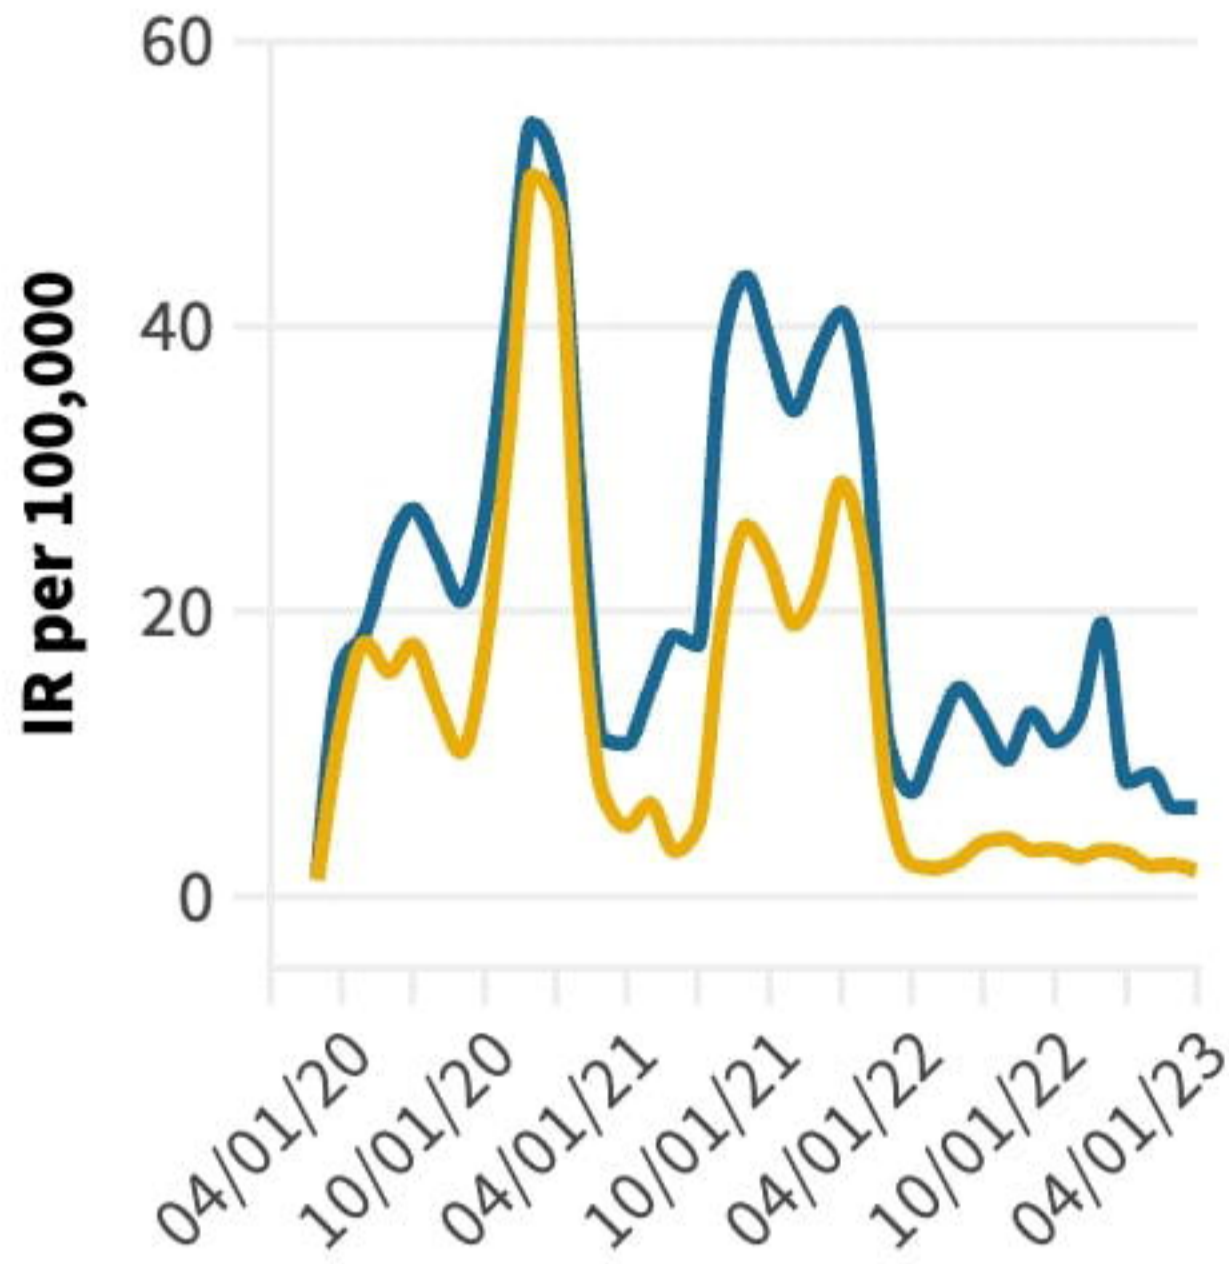

All ages, Asian,  $r=0.98$ ,  $p<0.001$

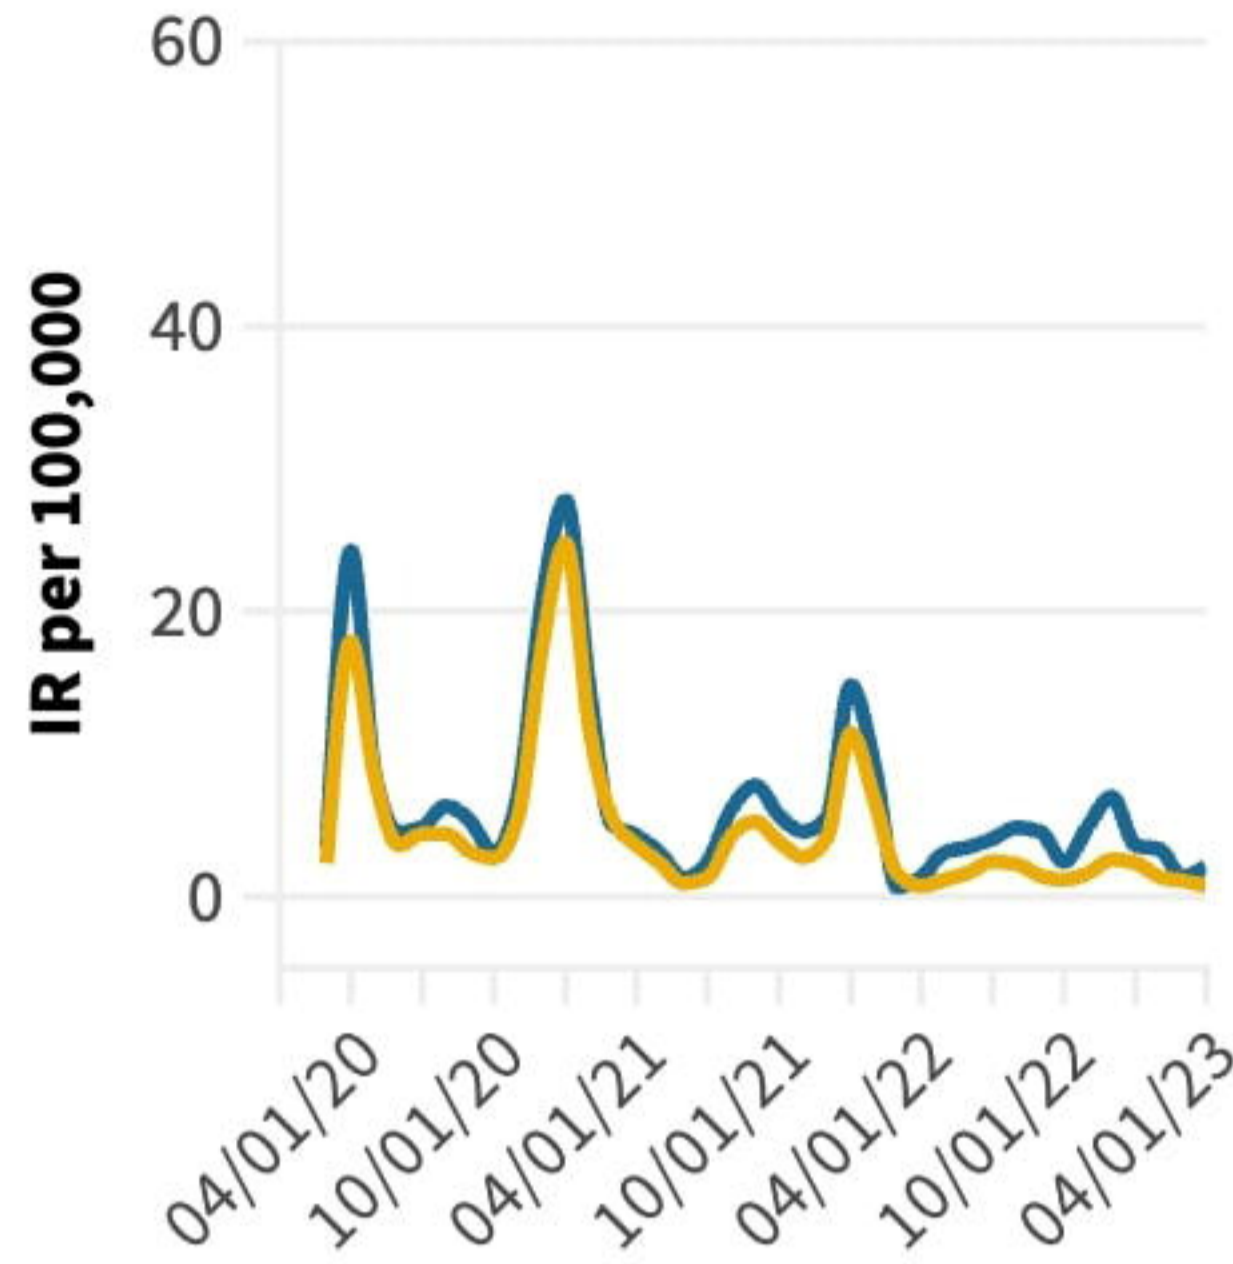

All ages, Black or African American,  $r=0.98$ ,  $p<0.001$

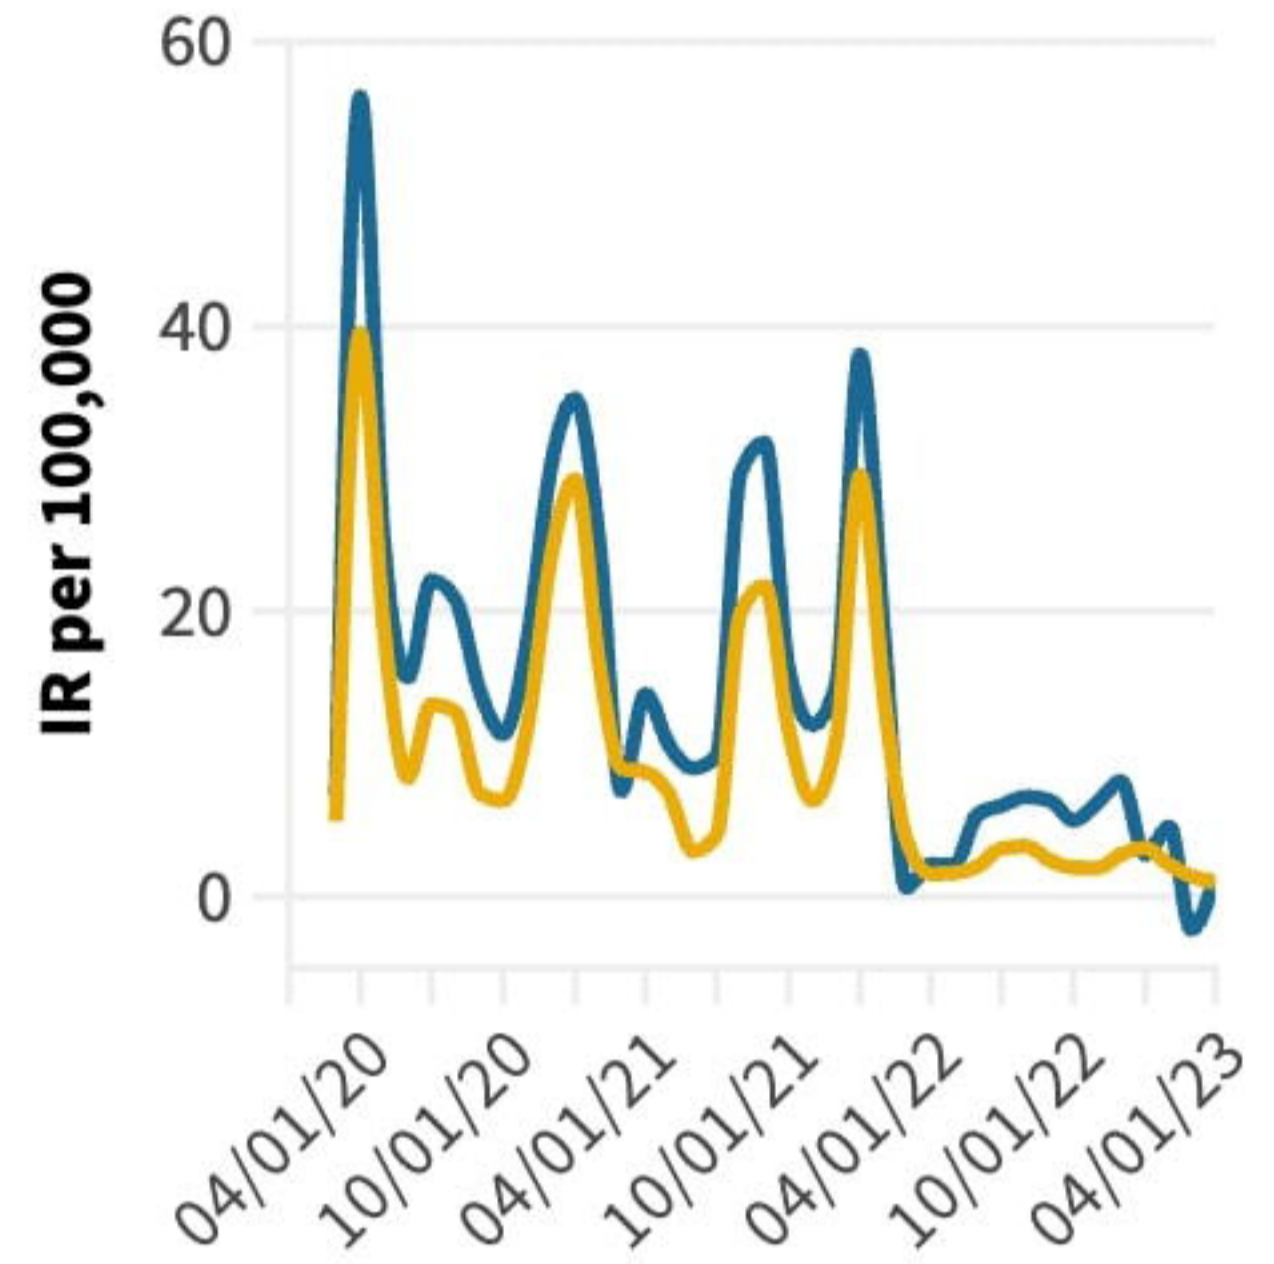

All ages, Hispanic,  $r=0.99$ ,  $p<0.001$

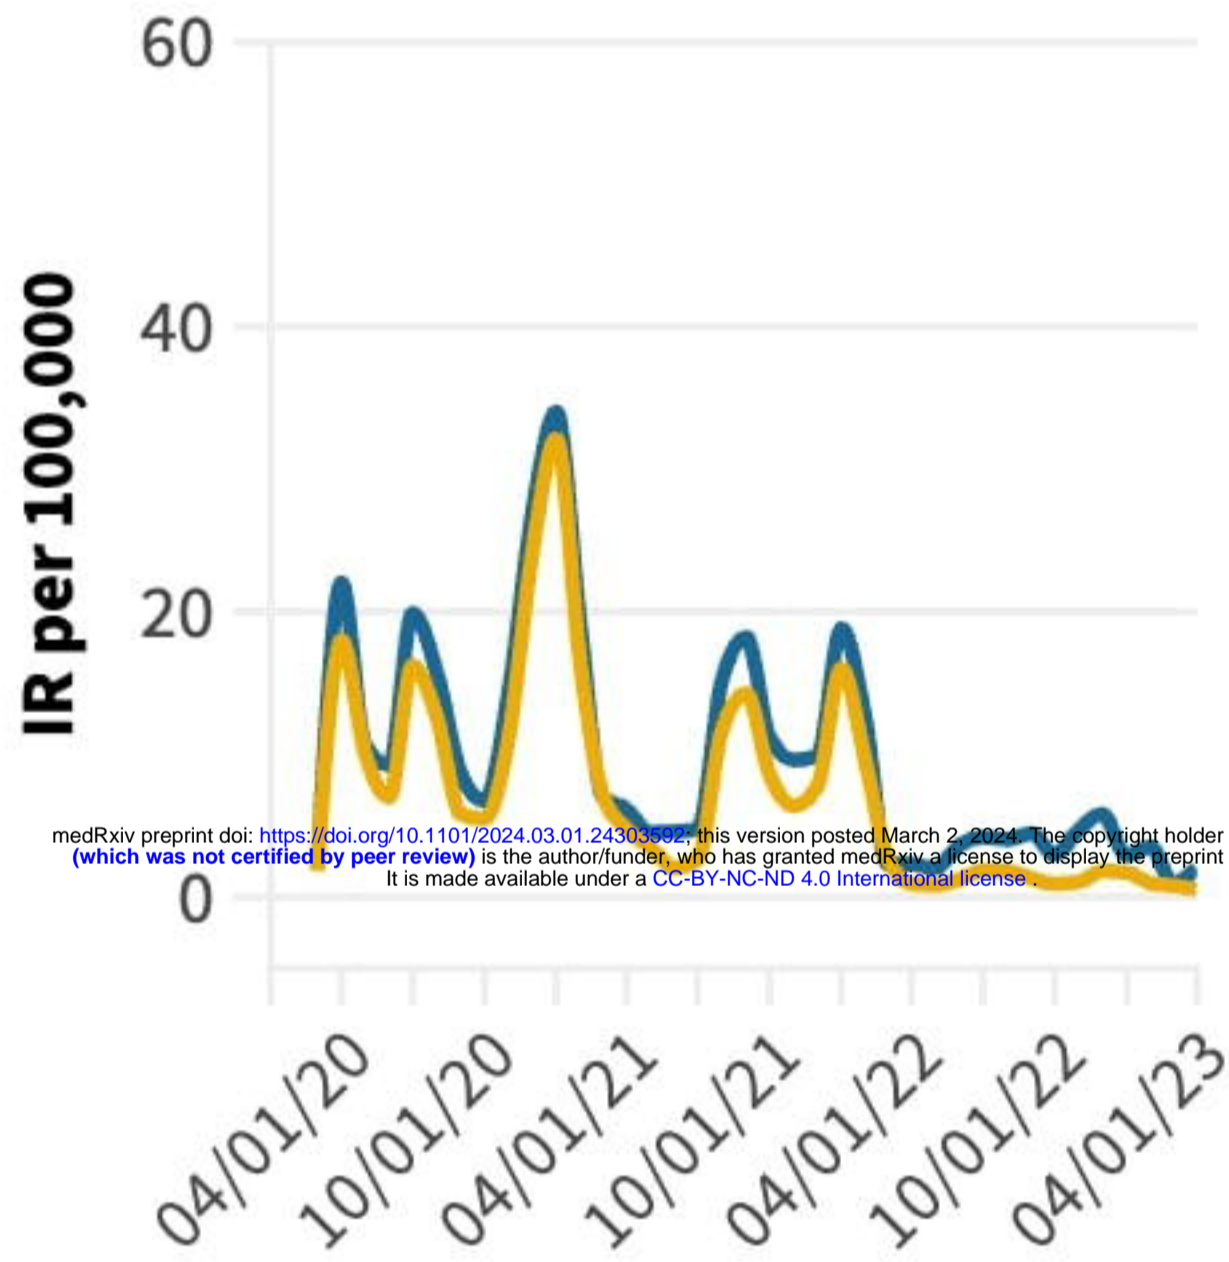

All ages, More than one race,  $r=0.96$ ,  $p<0.001$

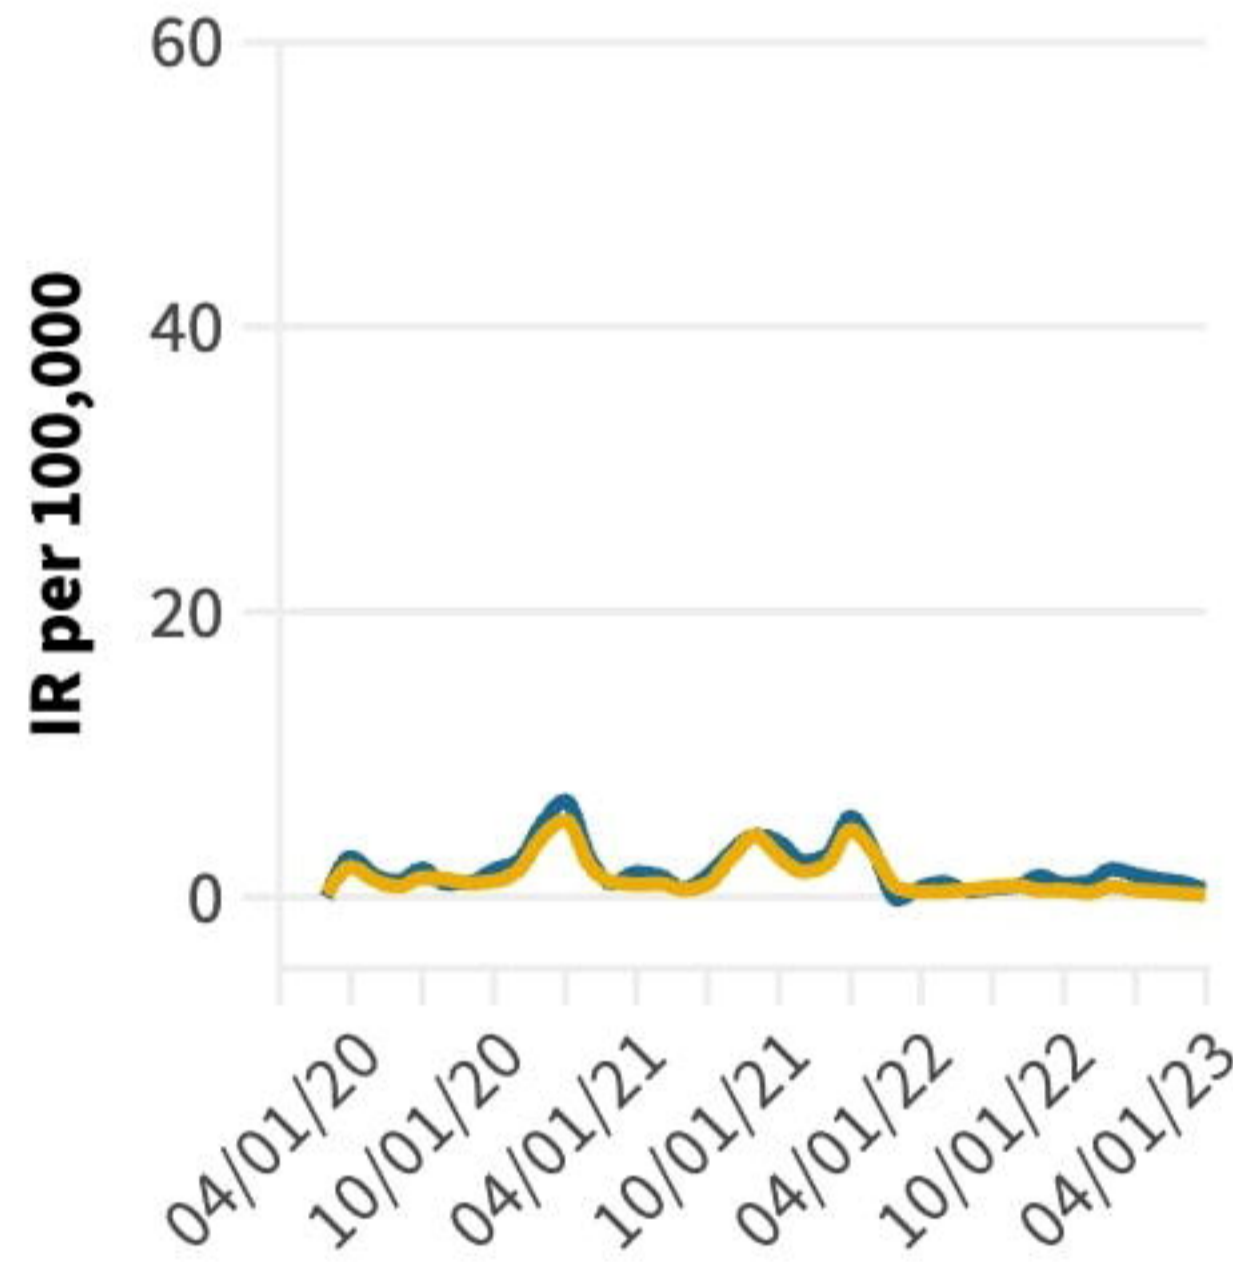

All ages, Native Hawaiian or Other Pacific Islander,  $r=0.92$ ,  $p<0.001$

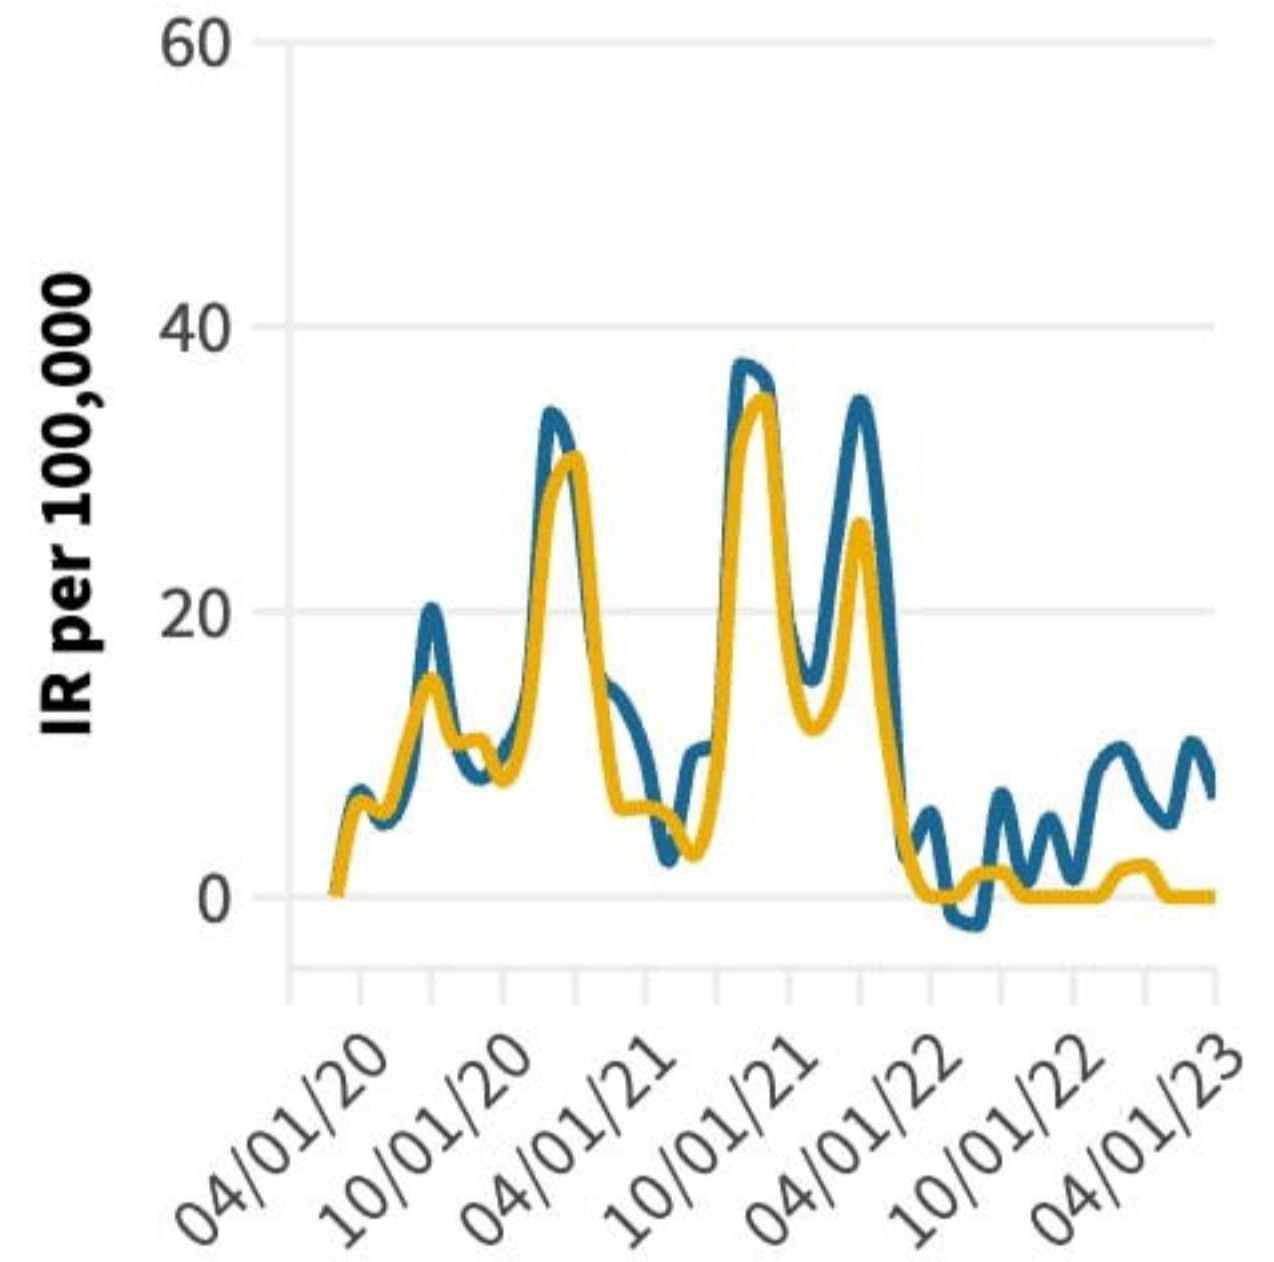

All ages, White,  $r=0.93$ ,  $p<0.001$

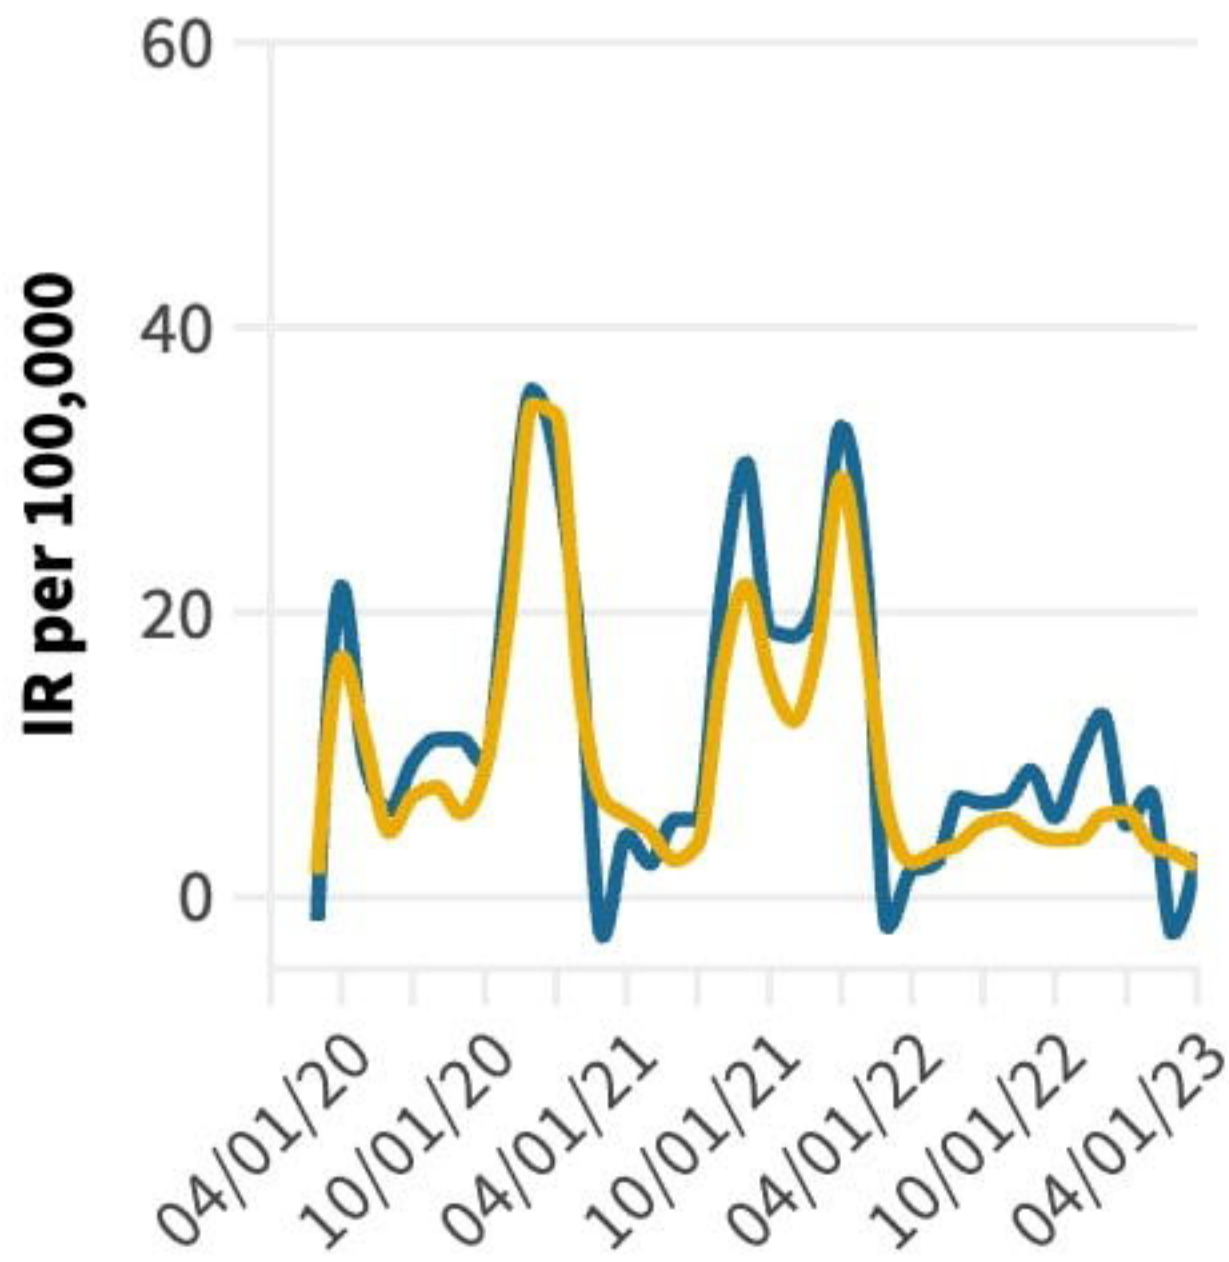

All ages, All races,  $r=0.95$ ,  $p<0.001$

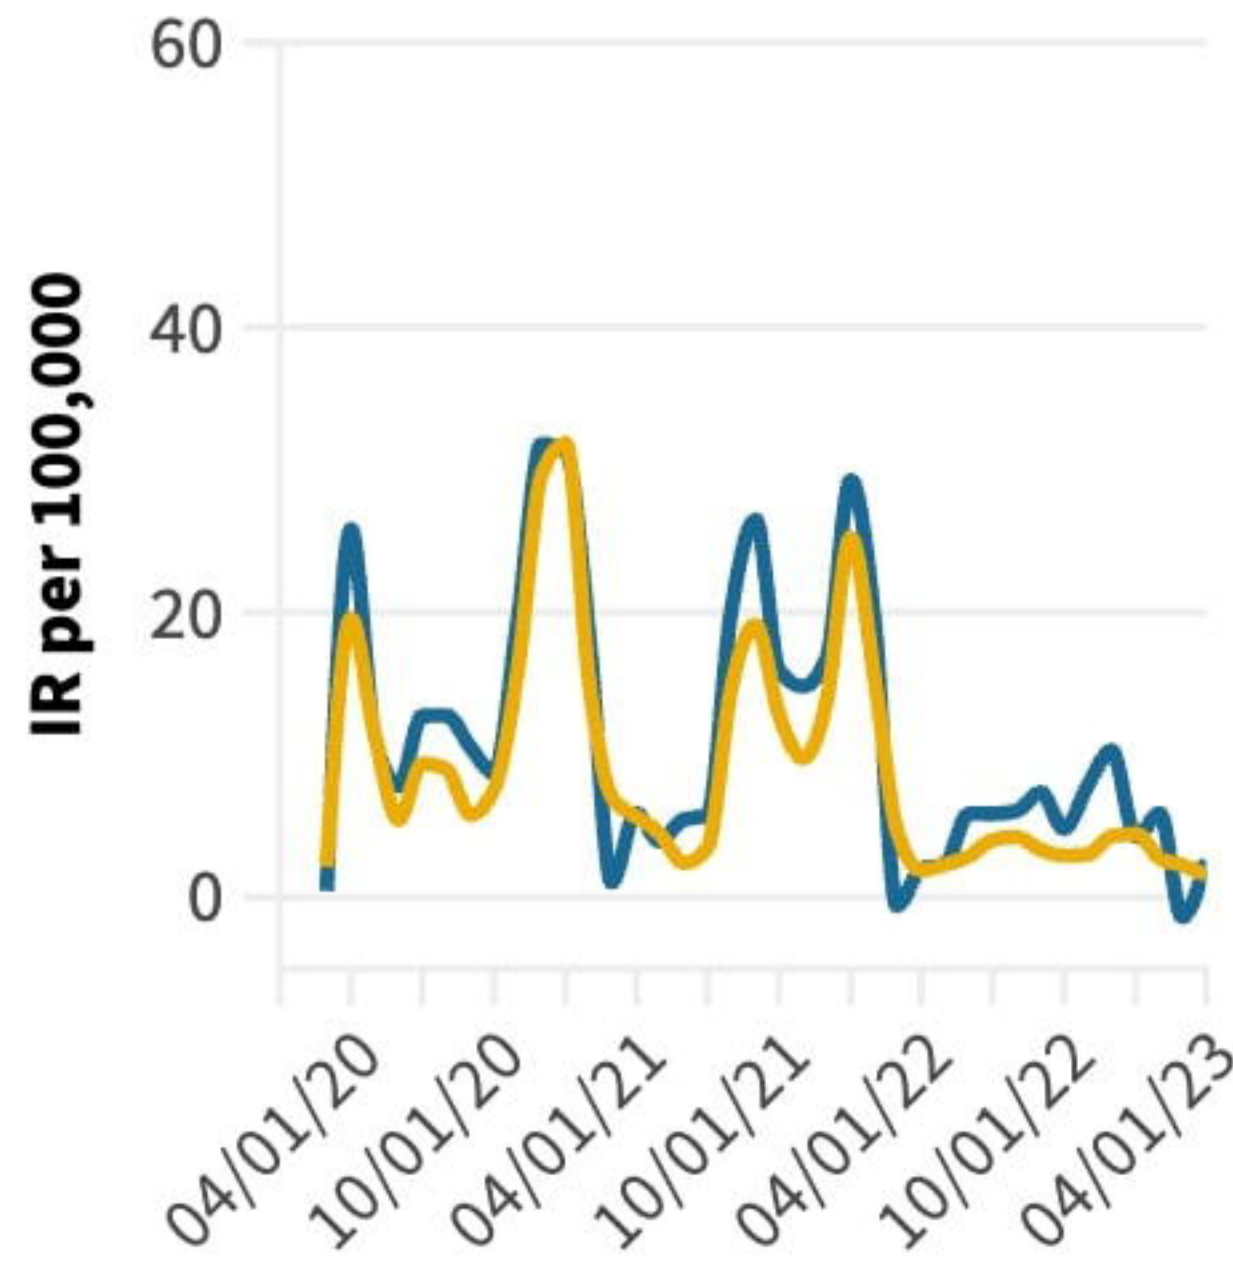

medRxiv preprint doi: <https://doi.org/10.1101/2024.03.01.24301997>; this version posted March 2, 2024. The copyright holder for this preprint (which was not certified by peer review) is the author/funder, who has granted medRxiv a license to display the preprint in perpetuity. It is made available under a CC-BY-NC-ND 4.0 International license.

# Pandemic Yearly and Monthly RR: Age-Adjusted

■ American Indian or Alaska Native 
 ■ Asian 
 ■ Black or African American 
 ■ Hispanic 
 ■ Native Hawaiian or Other Pacific Islander

**A. All ages, Pandemic periods**

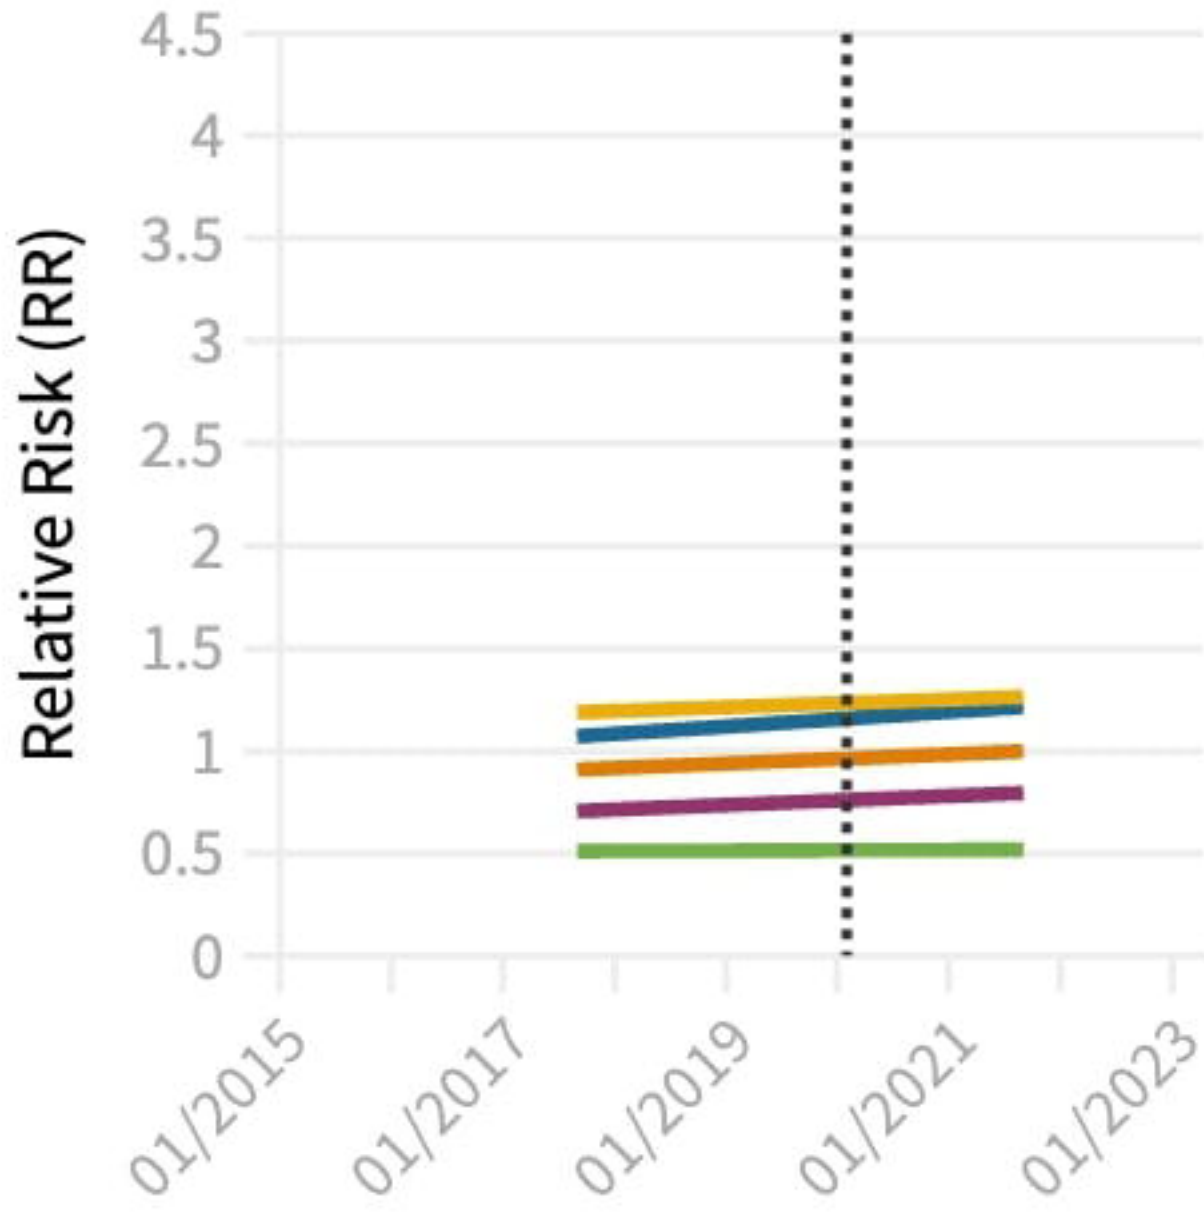

**B. All ages, Yearly**

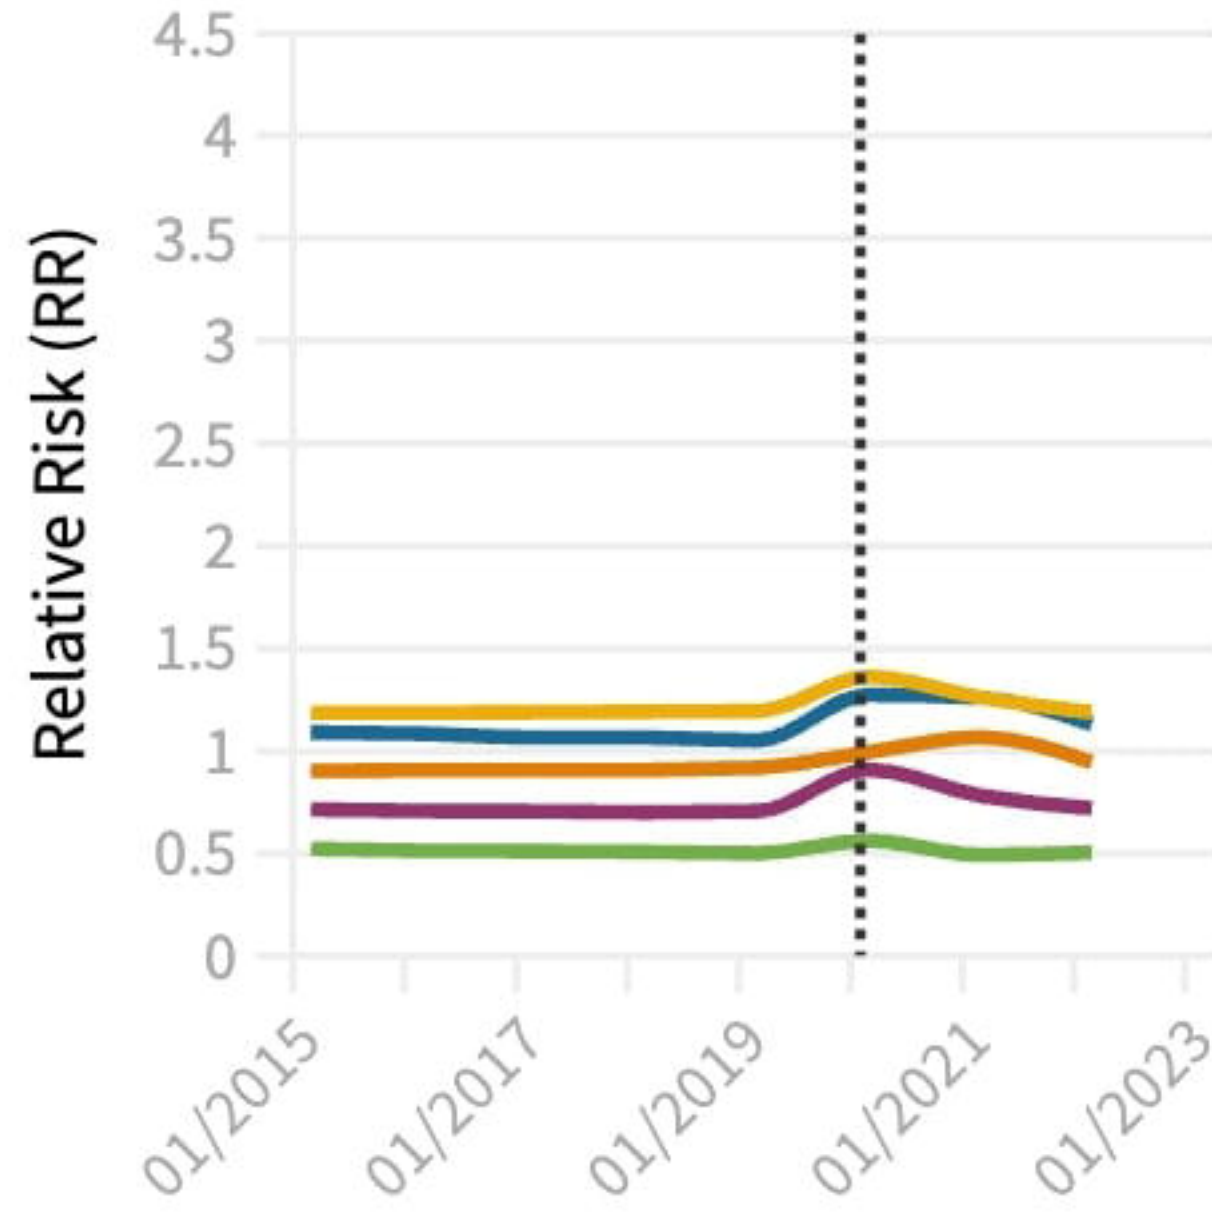

**C. All ages, Monthly**

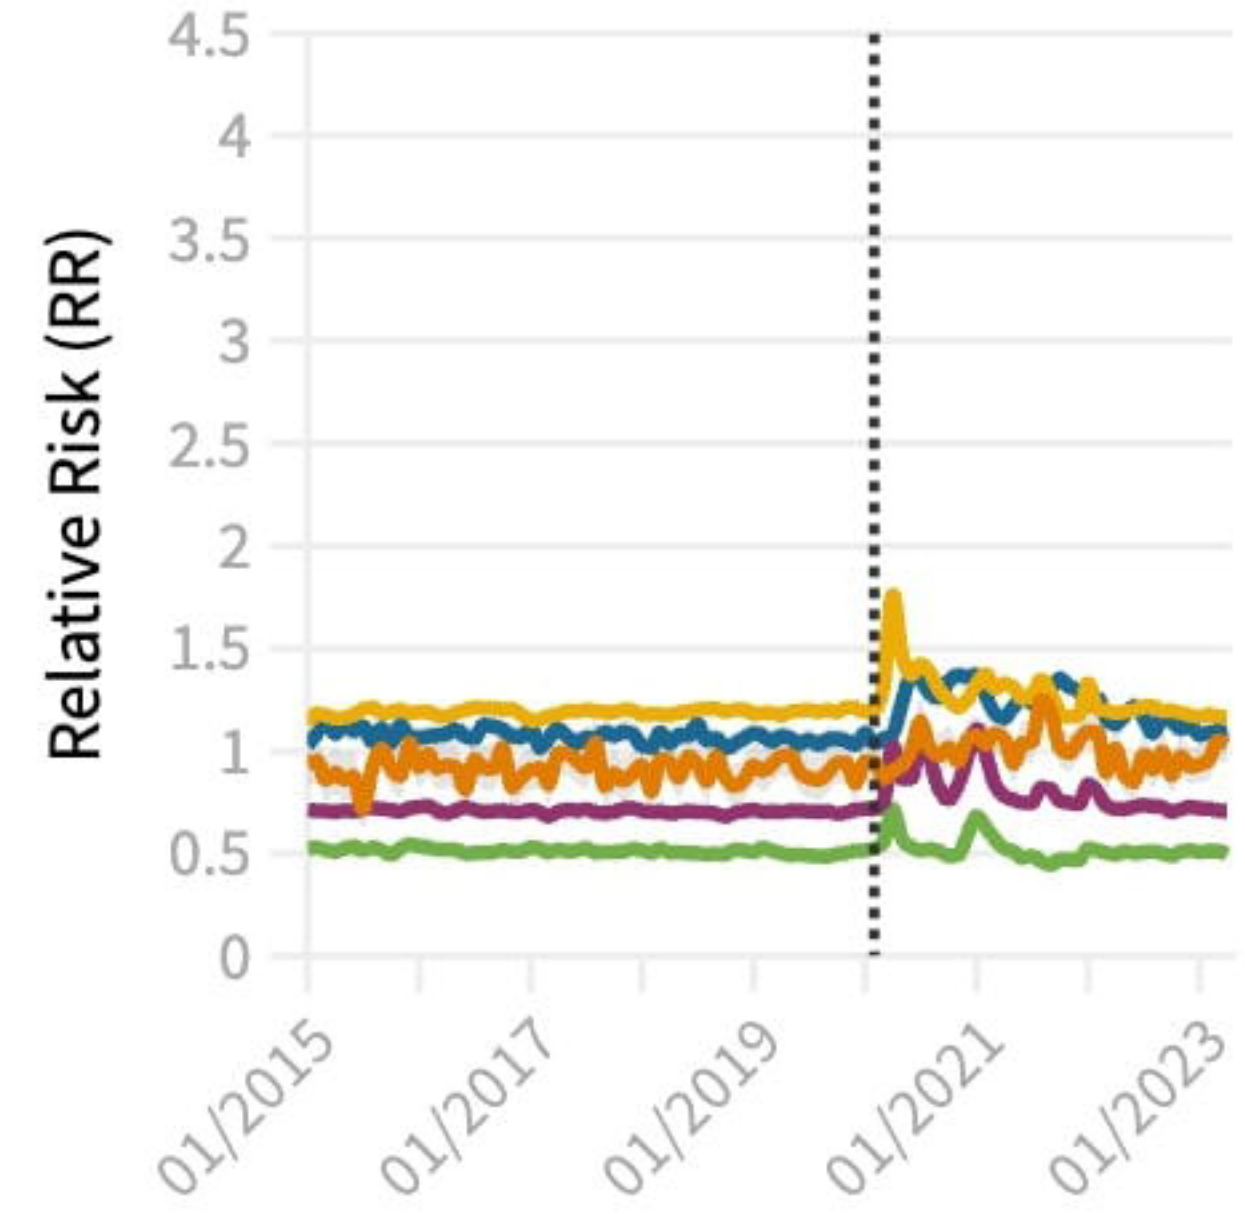

**D. <25 years, Pandemic periods**

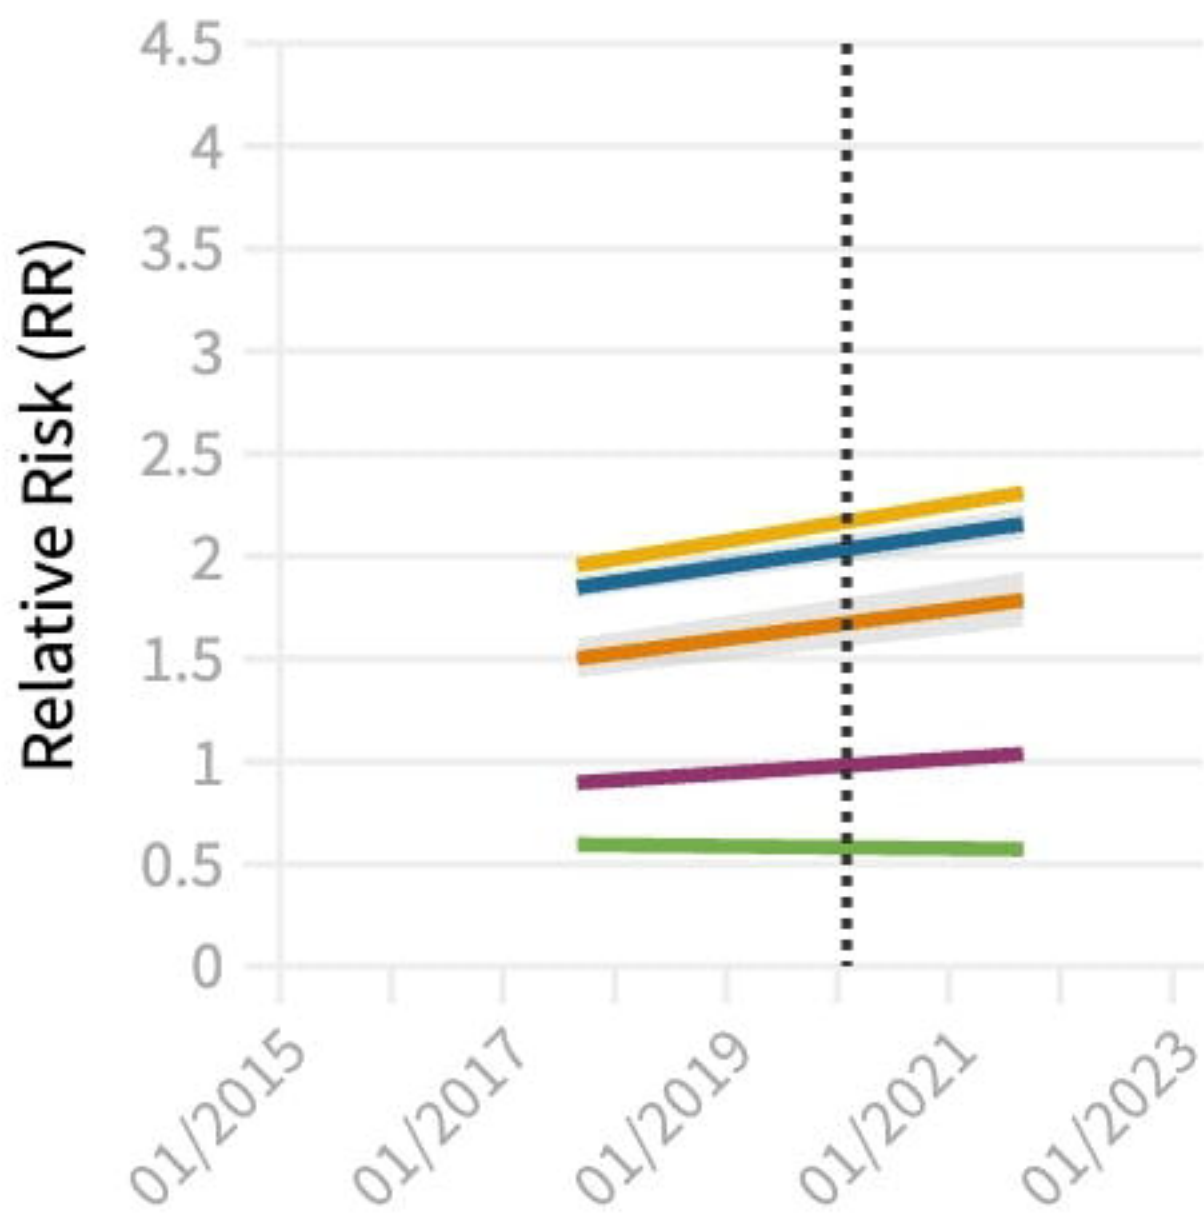

**E. <25 years, Yearly**

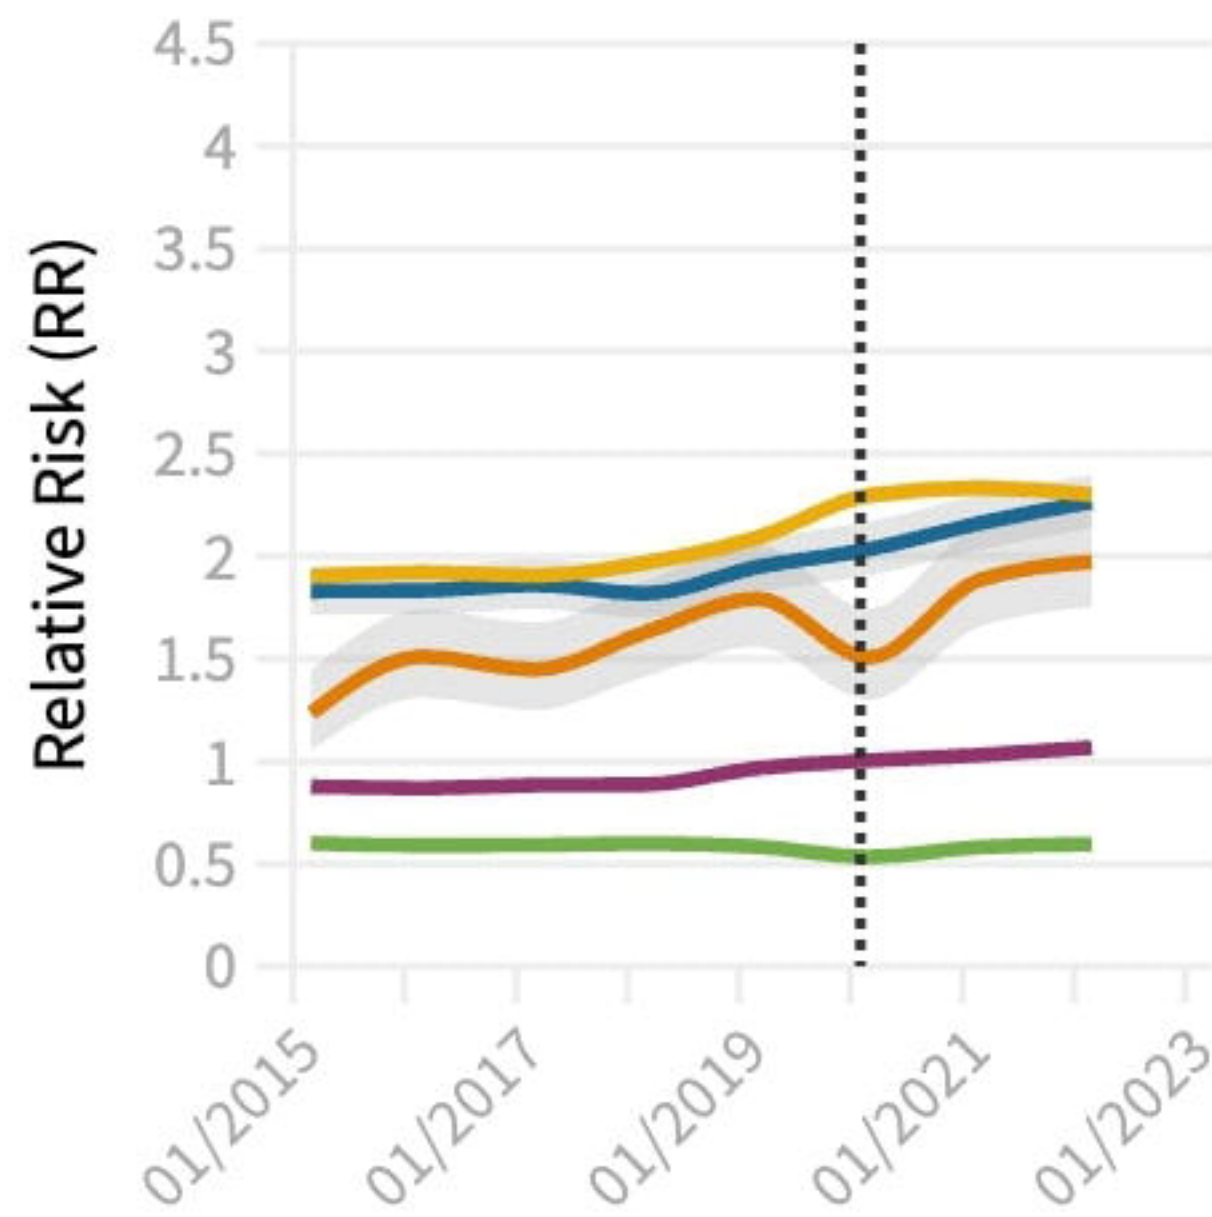

**F. <25 years, Monthly**

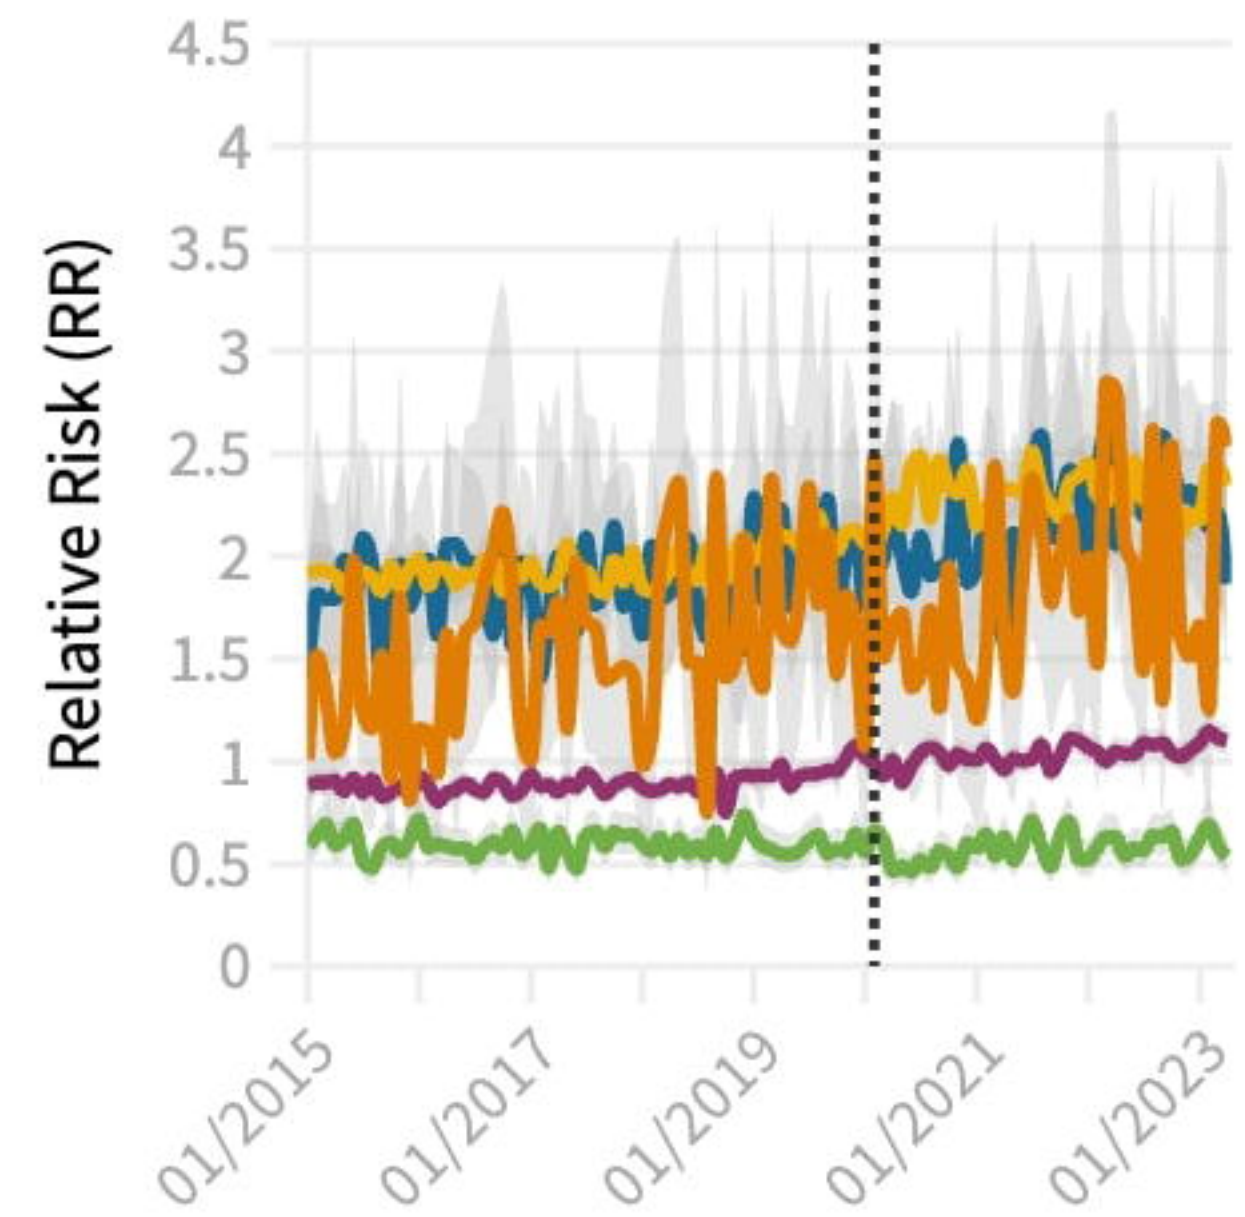

**G. 25-64 years, Pandemic periods**

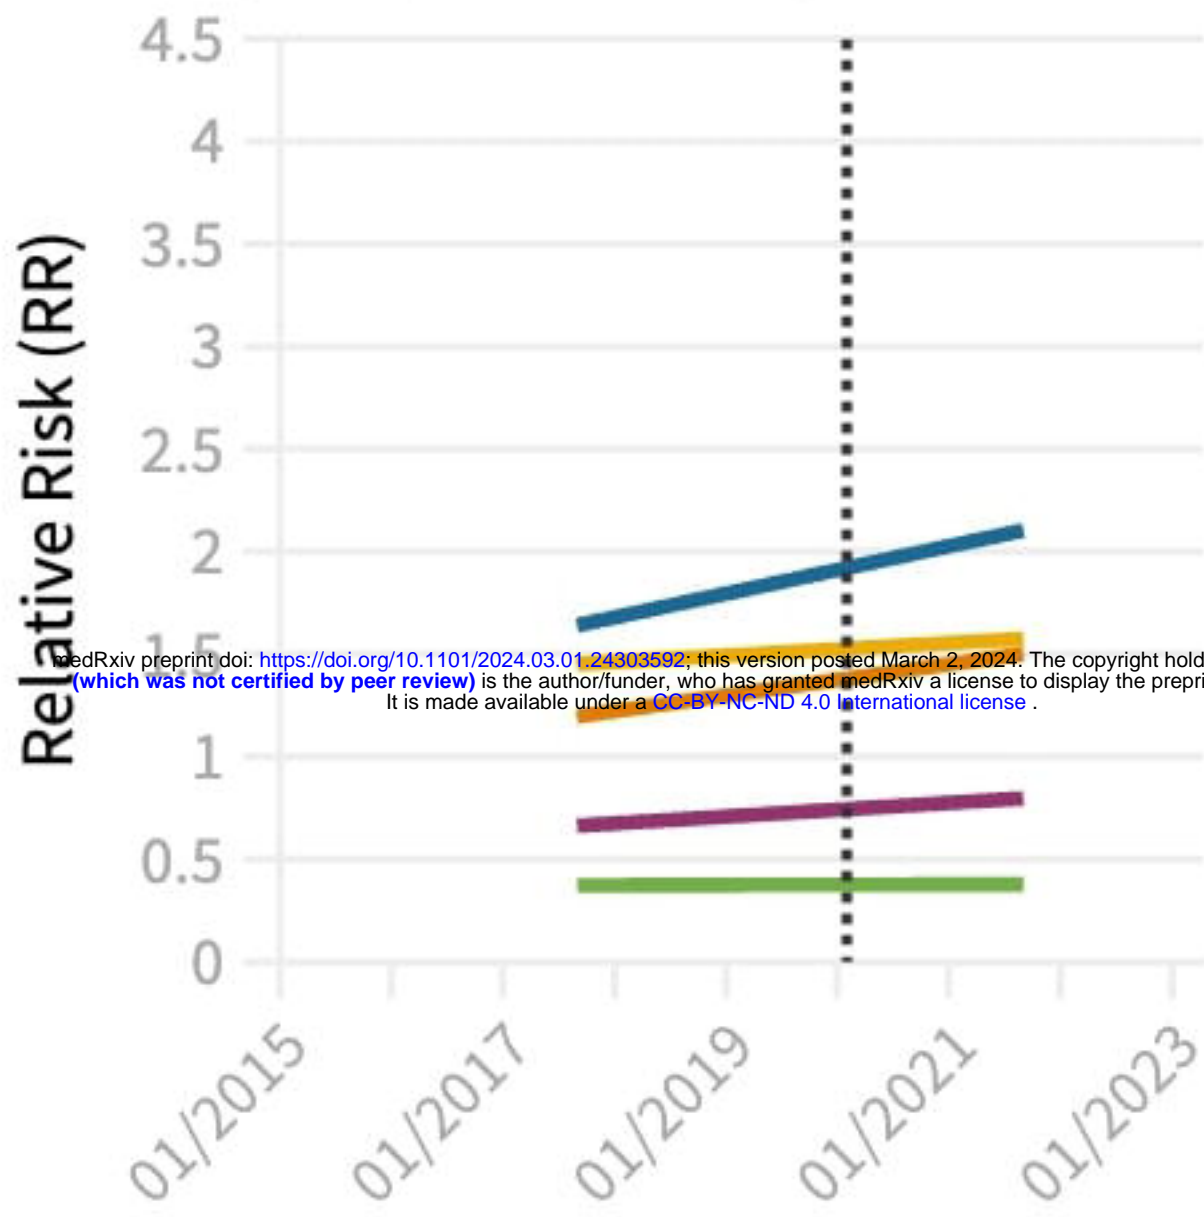

**H. 25-64 years, Yearly**

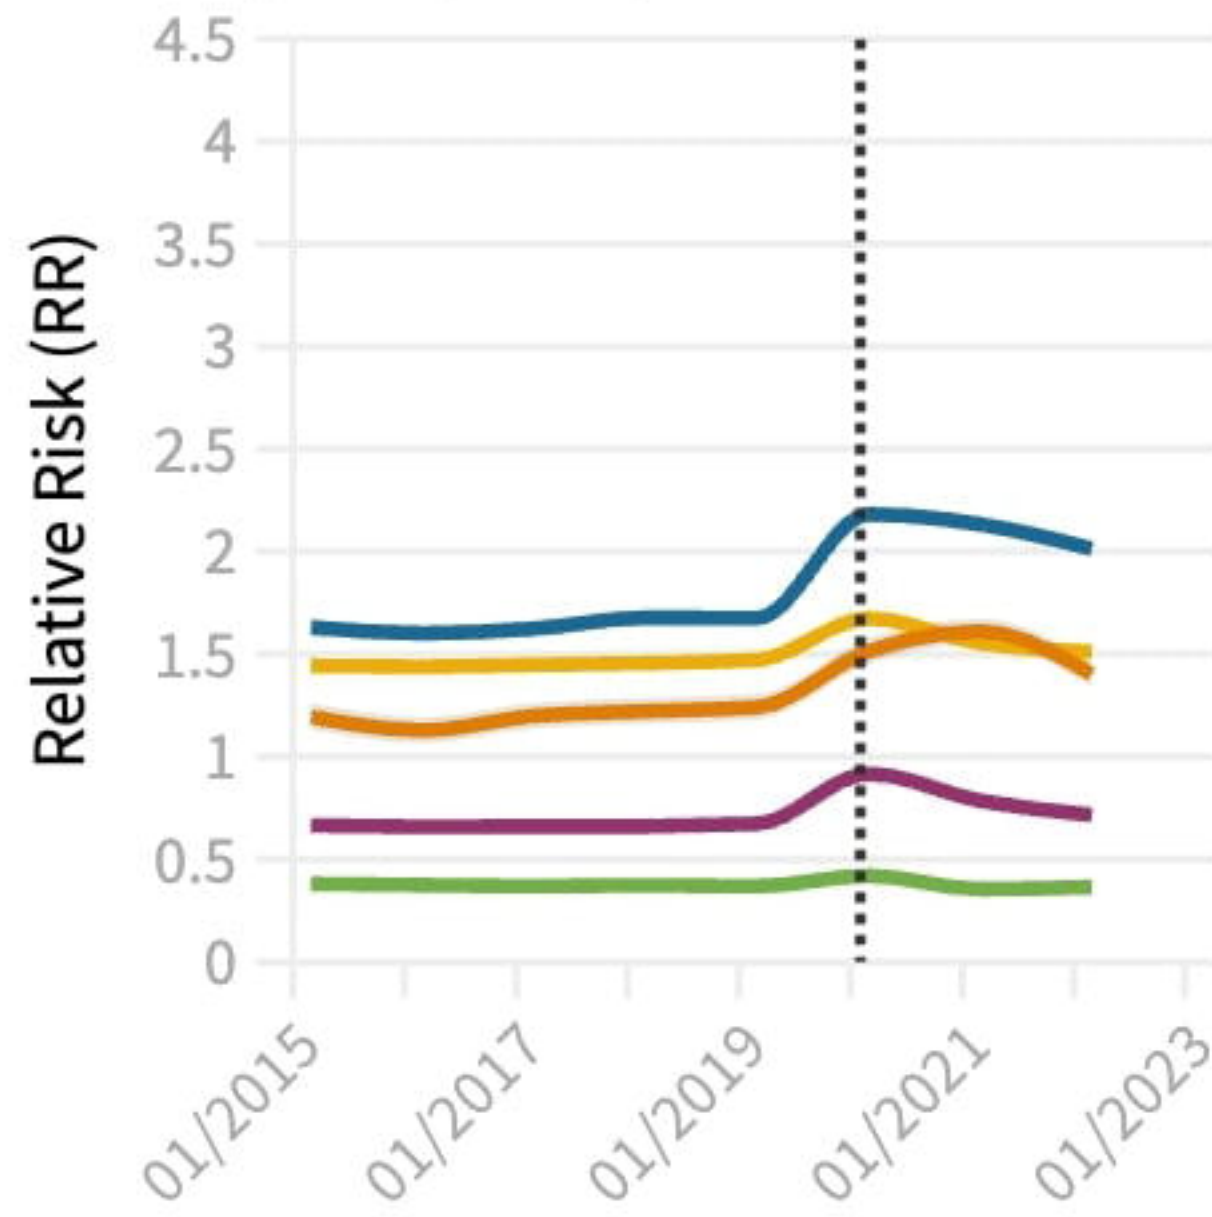

**I. 25-64 years, Monthly**

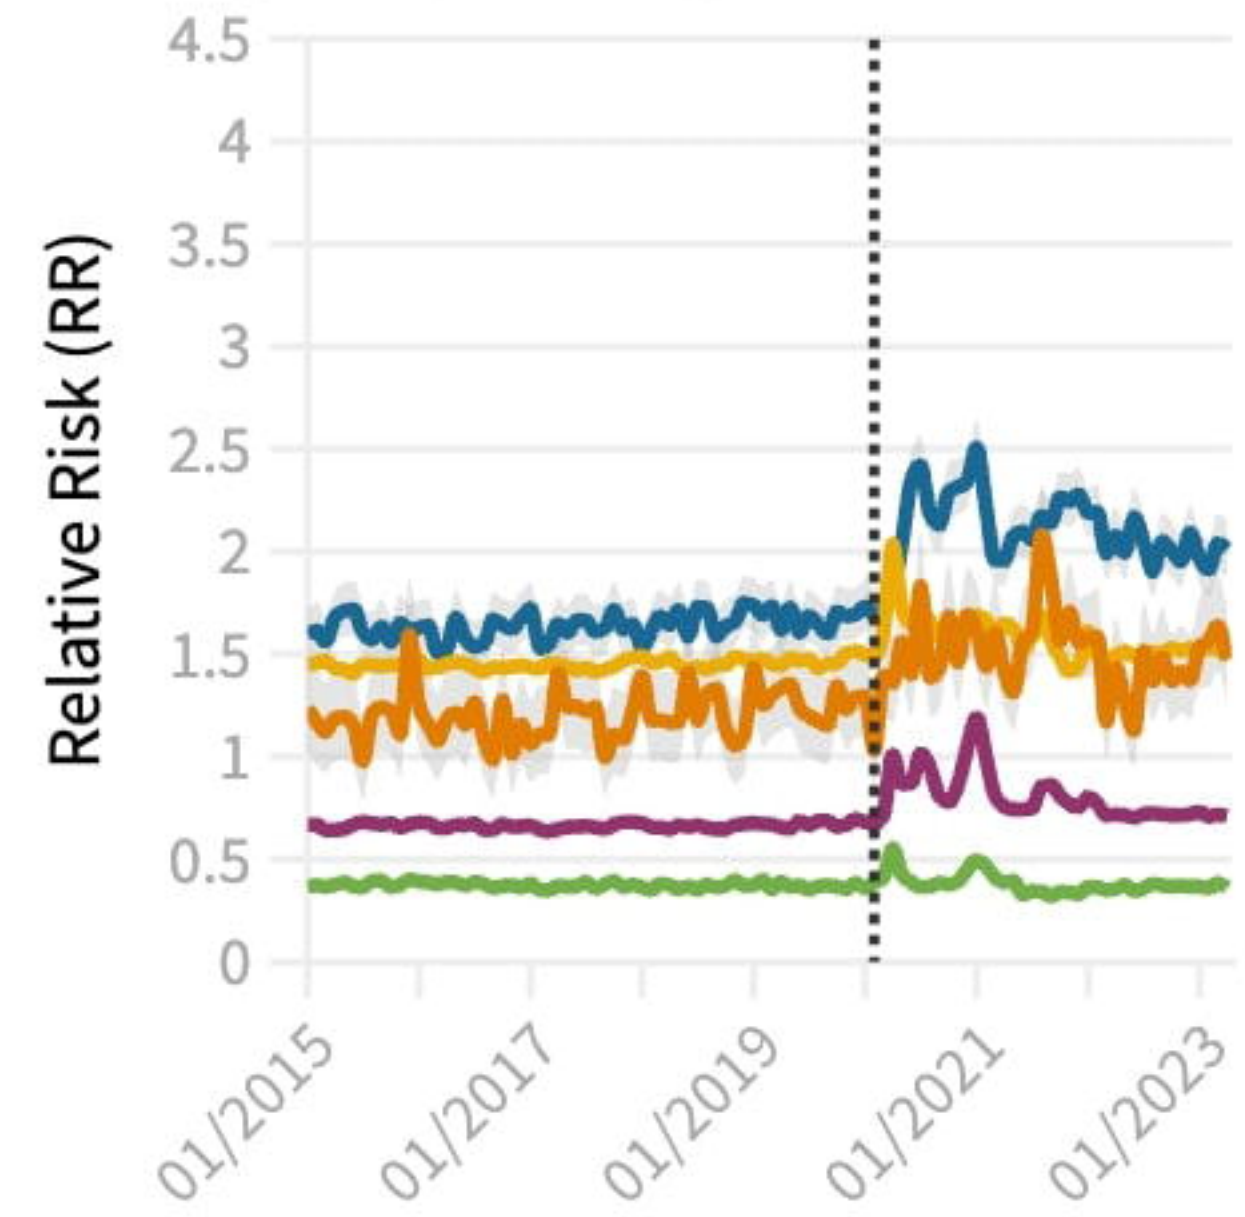

**J. 65+ years, Pandemic periods**

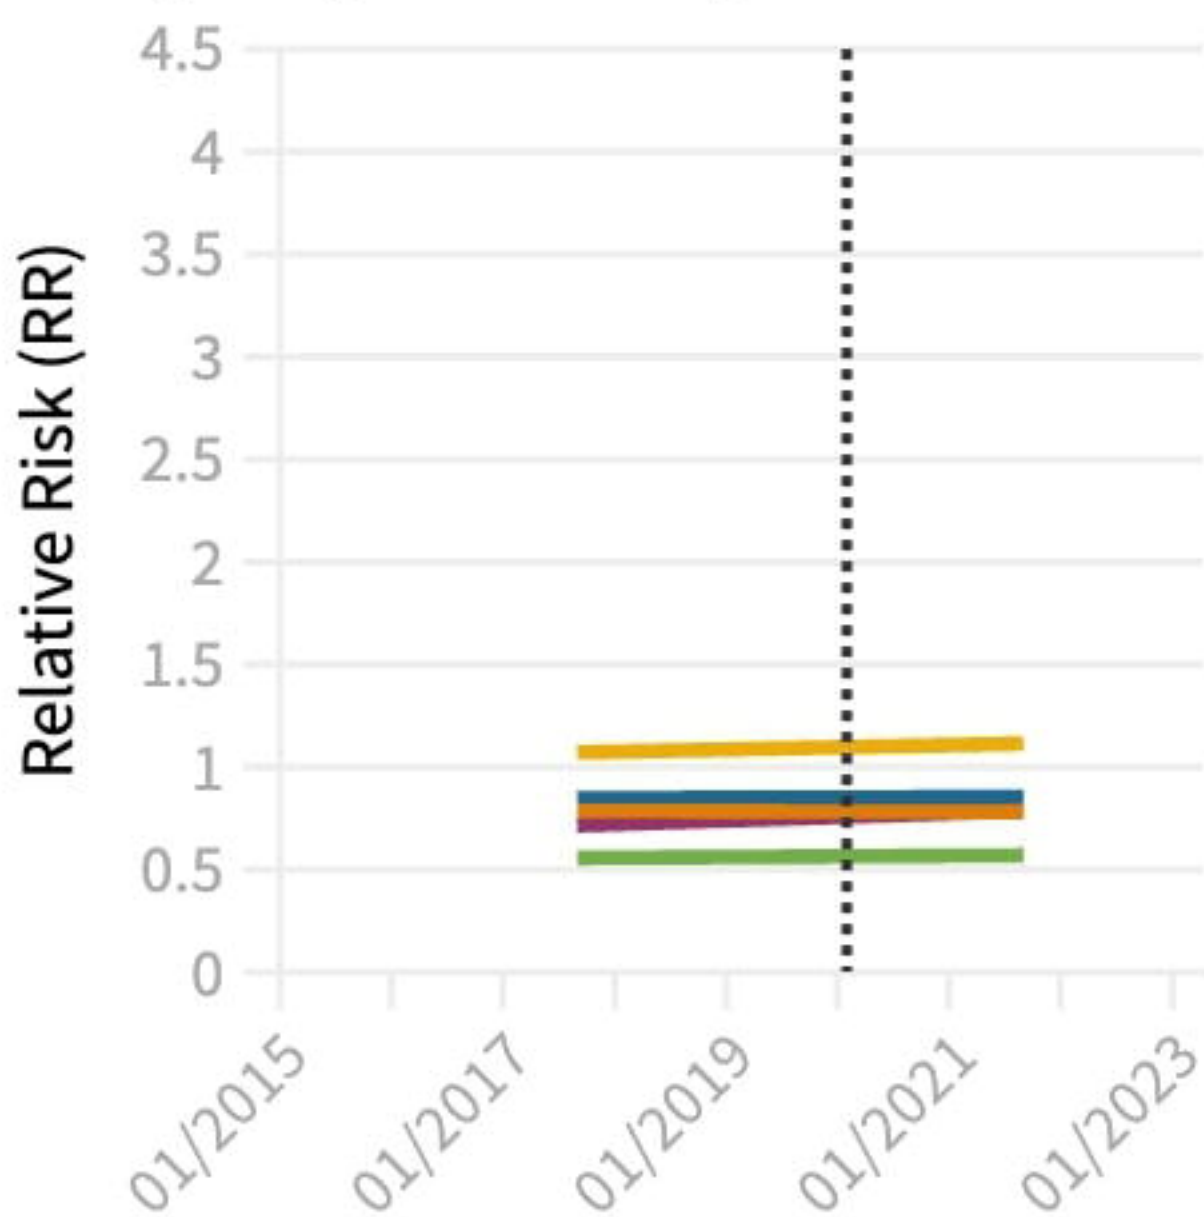

**K. 65+ years, Yearly**

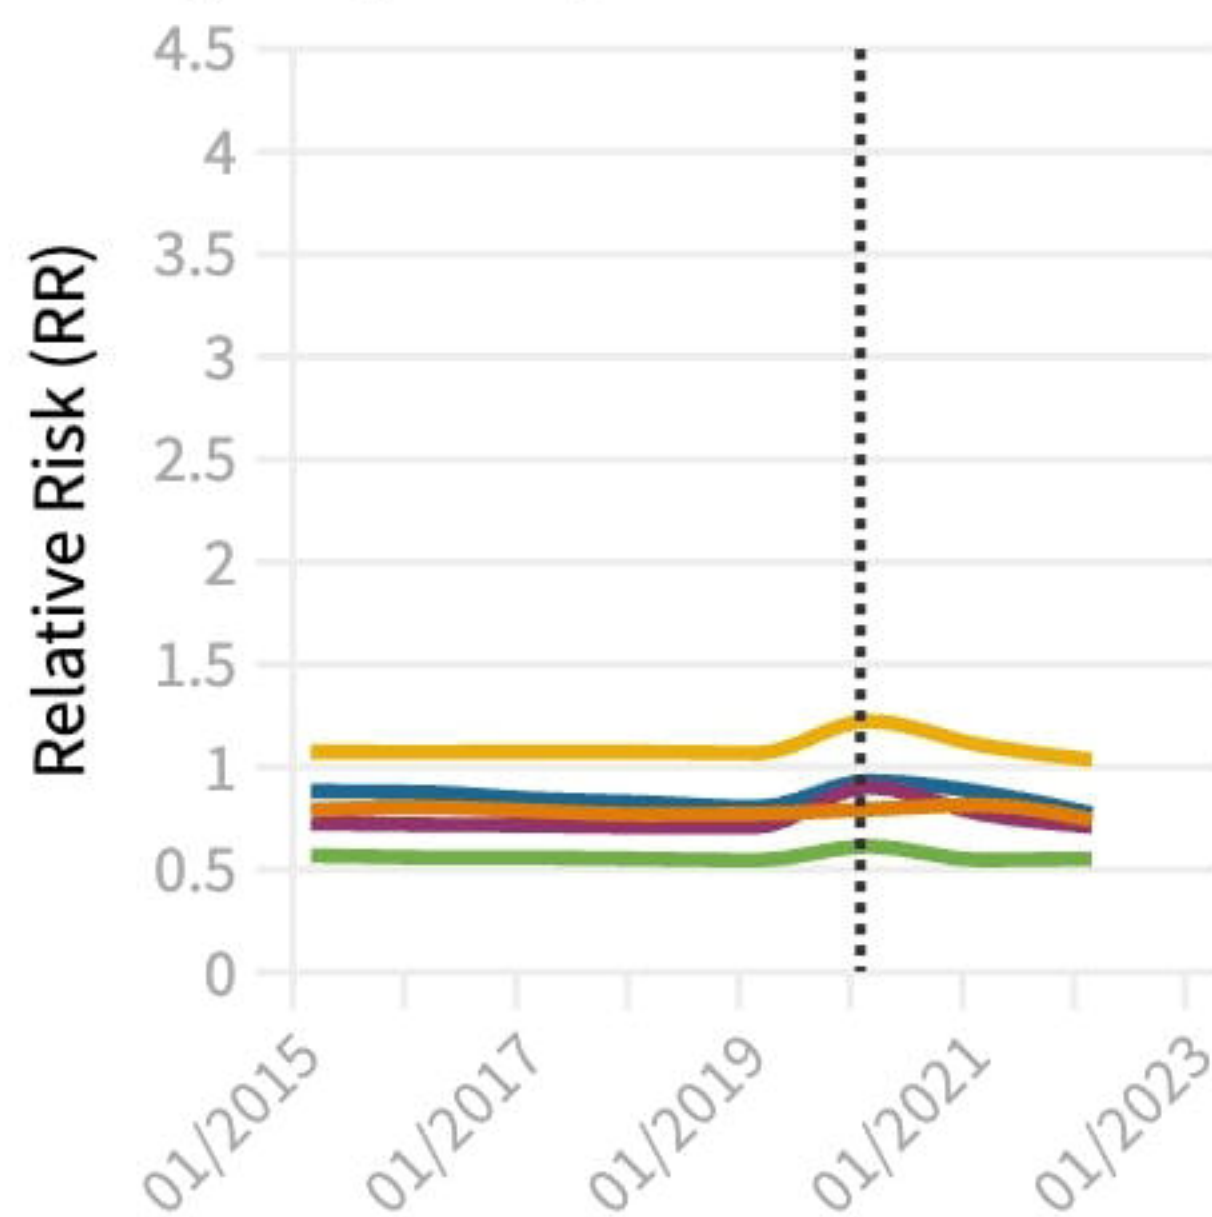

**L. 65+ years, Monthly**

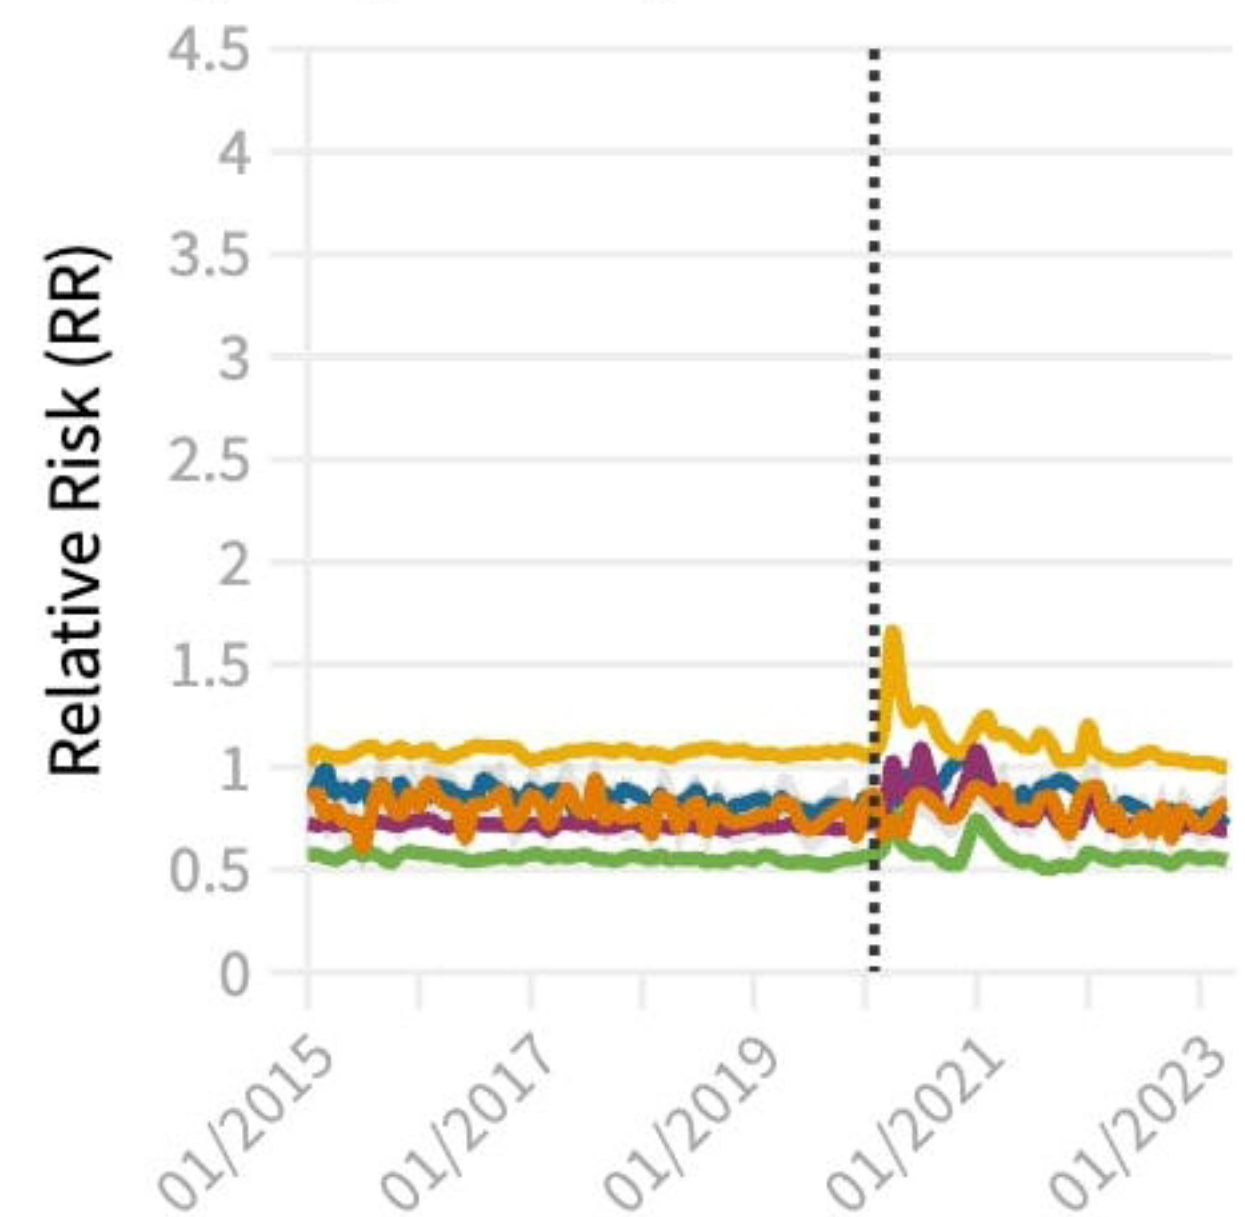

bioRxiv preprint doi: <https://doi.org/10.1101/2024.03.01.24303592>; this version posted March 2, 2024. The copyright holder for this preprint (which was not certified by peer review) is the author/funder, who has granted bioRxiv a license to display the preprint in perpetuity. It is made available under aCC-BY-NC-ND 4.0 International license.
